# Supplementary material
Source: HighWire-hosted journal article supplement (https://gut.bmj.com/content/69/8/1404)

**A Principal coordinates analysis (PCoA)**

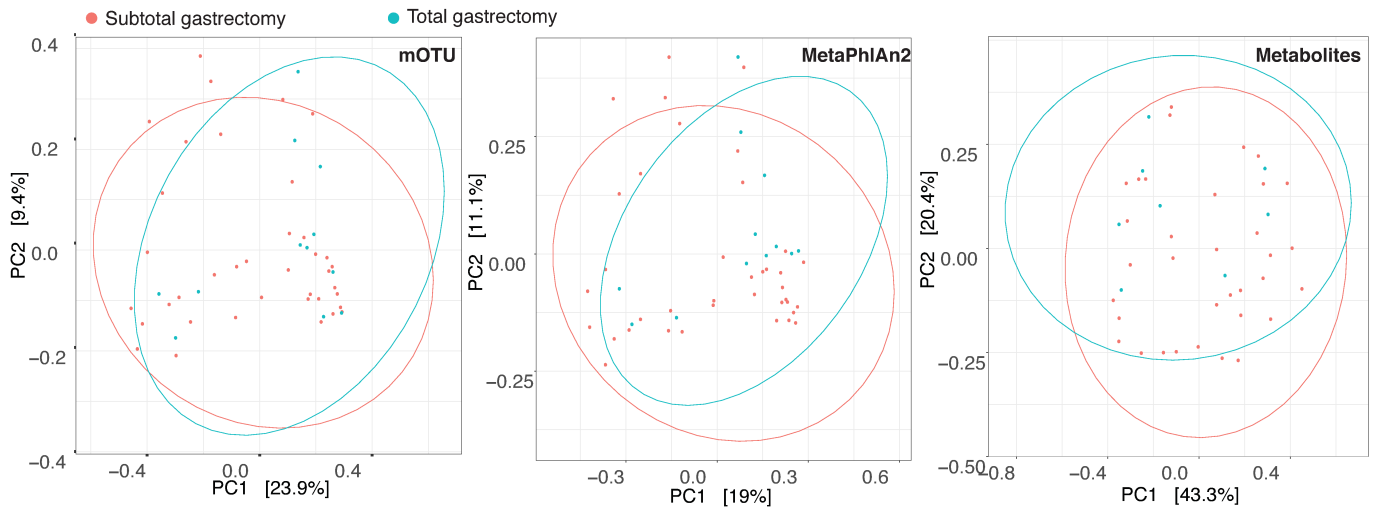

**B Species richness (Chao1 index)**

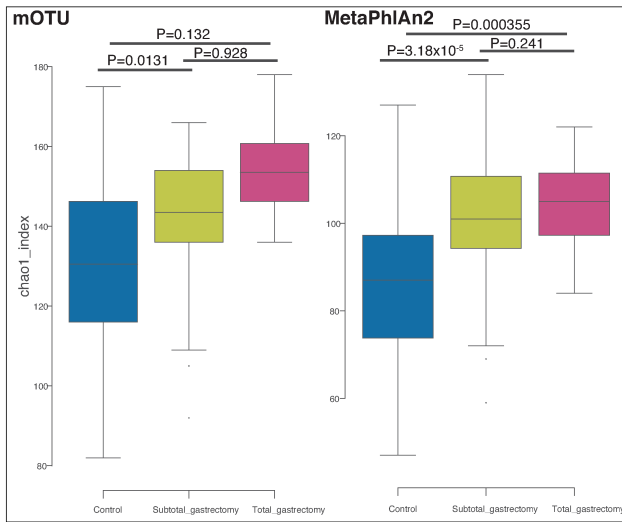

**C Species diversity (Shannon-Wiener index)**

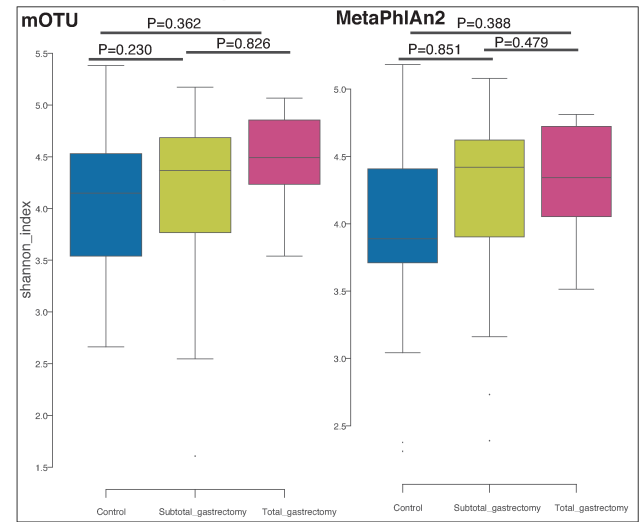

**D Oral species**

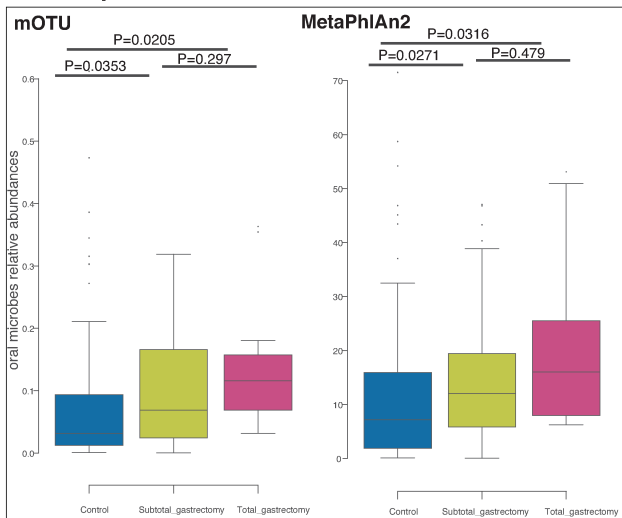

**E Aerobes**

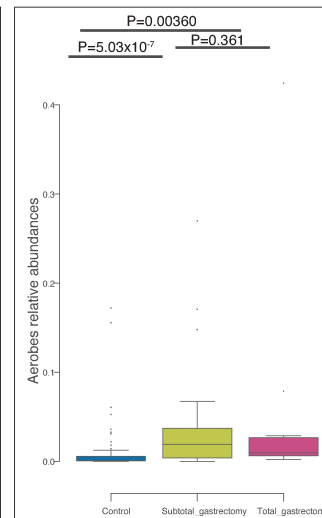

**F Facultative anaerobes**

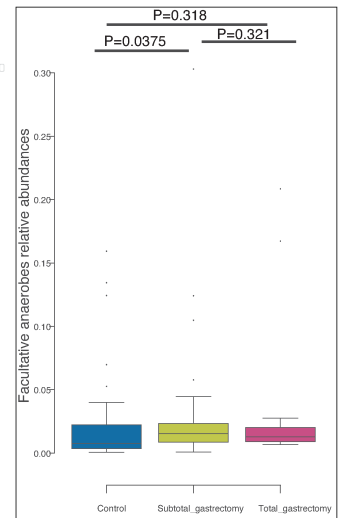

Supplement: inline-supplementary-material-8 [file inline-supplementary-material-8.pdf]
