# Supplementary material
Source: HighWire-hosted journal article supplement (https://gut.bmj.com/content/69/8/1404)
Supplement: inline-supplementary-material-14 [file inline-supplementary-material-14.xls]

## Sheet: DiabetesMed
Supplementary Table S7. Microbiome and metabolome profiles after exclusion of diabetes therapeutic medication users (control, n=43; gastrectomy, n=48)
a. Species profiles
mOTU-annotated species	p_valKW	FDR	LDA_score	enrichment	Log2FC
Streptococcussp_2_1_36FAA	5.70726e-05	0.000796012	2.07622	Gastrectomy	0.56499
Streptococcusaustralis	0.00397352	0.0226026	2.08042	Gastrectomy	0.178236
Streptococcussp_oraltaxon071	0.000797341	0.00728604	2.09116	Gastrectomy	0.890042
Streptococcusgallolyticus	0.0101869	0.0428497	2.11865	Gastrectomy	1.25602
Streptococcussp_C300	0.0174324	0.0608823	2.12333	Control	-0.206013
Anaerostipessp_3_2_56FAA	0.0167434	0.0607807	2.15846	Control	-0.342614
Clostridiumspiroforme	0.000288344	0.00332222	2.16263	Control	-0.735521
Fusobacteriumperiodonticum	0.00682535	0.0301453	2.17538	Gastrectomy	1.12051
Fusobacteriumnucleatum	0.00416255	0.0226026	2.21061	Gastrectomy	0.861414
Parvimonasmicra	0.0108185	0.0447953	2.22241	Control	-1.86957
Salmonellaenterica	0.00607811	0.028357	2.24136	Control	-1.36584
Anaerotruncuscolihominis	0.013056	0.0516395	2.24997	Gastrectomy	0.396538
Lachnospiraceaebacterium2_1_46FAA	0.0260477	0.0821744	2.27216	Control	-8.54805
Anaerostipescaccae	0.0200873	0.0682454	2.28566	Control	-1.32764
Streptococcusoralis	0.0155133	0.0570975	2.29125	Gastrectomy	0.13316
Pyramidobacterpiscolens	0.0207243	0.0695182	2.33732	Gastrectomy	2.59302
Streptococcussanguinis	0.00181829	0.013059	2.34058	Gastrectomy	1.15754
Oribacteriumsinus	0.031102	0.0905716	2.34967	Gastrectomy	1.4926
Streptococcusinfantis	0.000619904	0.00586695	2.35152	Gastrectomy	0.304438
Blautiahydrogenotrophica	0.0298432	0.088859	2.35716	Control	-5.12239
Megasphaeramicronuciformis	0.0270154	0.0842245	2.36552	Control	-1.4713
Streptococcuspasteurianus	0.00481096	0.0254981	2.3694	Gastrectomy	0.295305
Eggerthellasp_1_3_56FAA	0.000600124	0.00586695	2.38539	Control	-2.16185
Eggerthellasp_HGA1	0.00601692	0.028357	2.39158	Control	-1.79733
Desulfovibriopiger	0.0333019	0.0948925	2.40005	Gastrectomy	-0.00287282
Streptococcusmutans	1.07742e-05	0.000190345	2.4066	Gastrectomy	2.03619
Streptococcusdownei	0.000355031	0.00392013	2.40664	Gastrectomy	5.20787
Lachnospiraceaebacterium5_1_57FAA	0.0345339	0.0963313	2.43485	Control	-3.62989
Clostridiumsp_HGF2	9.3313e-06	0.000176628	2.45315	Control	-3.20554
Campylobacterconcisus	0.0041708	0.0226026	2.46065	Gastrectomy	2.1129
Prevotellamelaninogenica	0.0121843	0.0496743	2.48859	Gastrectomy	3.77788
Coprococcuseutactus	0.013562	0.0528519	2.49454	Gastrectomy	2.44114
Lactobacillusoris	0.0030876	0.0199564	2.51696	Gastrectomy	6.27406
Veillonellasp_3_1_44	5.59157e-05	0.000796012	2.52212	Gastrectomy	1.28666
Clostridiumscindens	0.0219188	0.0717098	2.52678	Control	-1.88347
Lactobacillusfermentum	0.00408132	0.0226026	2.5489	Gastrectomy	2.98822
Veillonellasp_6_1_27	9.21657e-06	0.000176628	2.5635	Gastrectomy	0.827038
Prevotelladenticola	0.00166906	0.0130088	2.57712	Gastrectomy	3.42656
Eggerthellalenta	7.01702e-06	0.000154959	2.58015	Control	-3.46002
Streptococcussp_M143	0.00245418	0.0168825	2.58046	Gastrectomy	1.20358
Streptococcusgordonii	2.29309e-06	7.59587e-05	2.58632	Gastrectomy	1.92728
Prevotellaveroralis	0.00129992	0.0110928	2.59444	Gastrectomy	4.65041
Coprobacillussp_D7	0.000138987	0.00175389	2.60349	Control	-2.00146
Streptococcusthermophilus	0.0146587	0.0547122	2.62496	Control	-0.895197
Aggregatibactersegnis	0.0067246	0.0301453	2.63889	Gastrectomy	2.09944
Prevotellabuccae	2.94083e-06	8.65912e-05	2.64025	Gastrectomy	9.94208
Klebsiellavariicola	0.00609943	0.028357	2.65729	Control	-2.0121
Bifidobacteriumcatenulatum	0.0174606	0.0608823	2.67262	Control	-3.52882
Bacteroidessp_2_2_4	0.0277193	0.0844325	2.6885	Control	-1.60658
Lachnospiraceaebacterium8_1_57FAA	0.00794017	0.0339378	2.69694	Control	-2.28635
Streptococcusmitis	0.0237	0.0765913	2.69812	Gastrectomy	0.0855667
Bifidobacteriumdentium	0.00182333	0.013059	2.70904	Control	-0.658166
Clostridiumsp_7_2_43FAA	0.0173513	0.0608823	2.73995	Control	-6.19719
Streptococcusperoris	0.00180904	0.013059	2.74255	Gastrectomy	0.589422
Klebsiellasp_1_1_55	0.00592752	0.028357	2.75687	Control	-2.72487
Blautiahansenii	0.0140107	0.0538092	2.78518	Control	-4.68586
Lachnospiraceaebacterium4_1_37FAA	0.0345248	0.0963313	2.80097	Control	-4.6547
Dorealongicatena	0.0193741	0.0666772	2.80213	Control	-0.281417
Atopobiumparvulum	0.00637309	0.0291184	2.81281	Gastrectomy	1.02703
Streptococcussp_C150	2.71416e-05	0.000449532	2.83252	Gastrectomy	2.66378
Ruminococcusobeum	0.00608857	0.028357	2.91158	Gastrectomy	0.155094
Veillonelladispar	4.47714e-06	0.000107858	2.92057	Gastrectomy	0.881956
Clostridiumramosum	0.000530271	0.00562088	2.92293	Control	-2.17002
Streptococcusanginosus	4.82779e-07	4.19562e-05	2.93639	Gastrectomy	3.90272
Solobacteriummoorei	2.90789e-05	0.000453288	2.96054	Gastrectomy	1.54352
Veillonellaparvula	3.30125e-06	8.74831e-05	2.98437	Gastrectomy	1.23119
Atopobiumrimae	0.0057385	0.028357	2.98513	Gastrectomy	1.403
Lachnospiraceaebacterium3_1_46FAA	0.00375887	0.0226026	2.98986	Control	-1.94566
Veillonellasp_oraltaxon158	7.50255e-05	0.000994087	3.03173	Gastrectomy	2.49603
Odoribactersplanchnicus	0.00362043	0.0226026	3.0606	Gastrectomy	0.887406
Enterobacteraerogenes	0.0145891	0.0547122	3.06224	Gastrectomy	3.06536
Lactobacillusgasseri	0.0260449	0.0821744	3.1214	Gastrectomy	3.72413
butyrate_producingbacteriumSS3_4	0.0213038	0.070569	3.14155	Gastrectomy	0.508874
Streptococcusequinus	0.0329183	0.0948189	3.28351	Gastrectomy	1.57639
Lachnospiraceaebacterium9_1_43BFAA	0.012445	0.0499686	3.30183	Control	-4.0337
Streptococcusvestibularis	6.33301e-07	4.19562e-05	3.31757	Gastrectomy	1.57006
Alistipesshahii	0.000560897	0.00571684	3.34614	Gastrectomy	1.35927
Roseburiainulinivorans	0.00138136	0.0110928	3.35568	Gastrectomy	0.610224
Streptococcusparasanguinis	0.000159348	0.00191941	3.3604	Gastrectomy	0.499121
Eubacteriumbiforme	0.00400484	0.0226026	3.37642	Gastrectomy	1.28787
Lachnospiraceaebacterium2_1_58FAA	2.78535e-08	3.69059e-06	3.38177	Control	-3.84764
Veillonellaatypica	1.66562e-06	7.35649e-05	3.38188	Gastrectomy	1.21923
Lactobacillussalivarius	0.00708988	0.0308003	3.38871	Gastrectomy	2.53579
Roseburiaintestinalis	0.0275275	0.0844325	3.40364	Control	-1.08736
Roseburiahominis	2.26199e-06	7.59587e-05	3.4829	Gastrectomy	1.30828
Eubacteriumeligens	0.00275917	0.0182795	3.57649	Gastrectomy	0.234272
Akkermansiamuciniphila	0.00417935	0.0226026	3.57687	Gastrectomy	2.4914
Bacteroidesintestinalis	0.00122088	0.0107844	3.64888	Gastrectomy	4.0548
Lactobacillusreuteri	0.0304676	0.0897101	3.65557	Gastrectomy	inf
Bifidobacteriumlongum	0.00248459	0.0168825	3.81529	Control	-2.49614
Alistipesputredinis	0.0057587	0.028357	3.85056	Gastrectomy	1.12564
Ruminococcusgnavus	1.35134e-08	3.58105e-06	3.8751	Control	-3.88227
Streptococcussalivarius	1.48336e-06	7.35649e-05	4.04354	Gastrectomy	1.41528
Klebsiellapneumoniae	0.00136987	0.0110928	4.07644	Gastrectomy	2.73864
Bacteroidesvulgatus	0.0287939	0.0867089	4.31455	Control	-0.758276
MetaPhlan2-annotated species	p_valKW	FDR	LDA_score	enrichment	Log2FC
Atopobium_parvulum	0.00037984	0.00476699	2.21248	Gastrectomy	0.680988
Anaerostipes_unclassified	0.0126958	0.0569042	2.27672	Control	-2.59534
Streptococcus_mutans	9.74451e-05	0.00222352	2.27991	Gastrectomy	1.98481
Anaerotruncus_colihominis	0.0025749	0.0179528	2.28073	Gastrectomy	0.454321
Scardovia_wiggsiae	0.00308161	0.0198329	2.29427	Gastrectomy	3.69934
Alistipes_indistinctus	0.00350717	0.0220075	2.29946	Gastrectomy	2.32044
Oribacterium_sinus	0.000265535	0.00392054	2.33242	Gastrectomy	1.23816
Streptococcus_sanguinis	0.00123714	0.0107077	2.33803	Gastrectomy	1.69218
Streptococcus_sobrinus	0.00285027	0.0188268	2.35238	Gastrectomy	2.98623
Lachnospiraceae_bacterium_2_1_58FAA	0.0164881	0.0701441	2.38783	Control	-1.8037
Veillonella_dispar	6.88904e-06	0.00022488	2.40122	Gastrectomy	0.775624
Blautia_producta	0.000378824	0.00476699	2.41451	Control	-5.09814
Lachnospiraceae_bacterium_9_1_43BFAA	0.00022918	0.00359526	2.41599	Control	-7.59097
Prevotella_histicola	0.000951028	0.00884104	2.43379	Gastrectomy	8.86208
Streptococcus_gordonii	0.00116159	0.0104128	2.43989	Gastrectomy	1.40214
Blautia_hydrogenotrophica	0.00277501	0.0188251	2.44076	Control	-7.42557
Clostridium_ramosum	0.000325635	0.0045408	2.45121	Control	-1.4561
Megasphaera_micronuciformis	0.00207654	0.0162879	2.46461	Control	-1.23204
Prevotella_melaninogenica	0.01967	0.0783679	2.48623	Gastrectomy	9.76295
Lactobacillus_oris	0.00537263	0.0293159	2.49155	Gastrectomy	inf
Streptococcus_tigurinus	0.00142407	0.0119147	2.49227	Gastrectomy	3.30879
Stomatobaculum_longum	0.0153784	0.0665514	2.53313	Gastrectomy	2.31587
Pyramidobacter_piscolens	0.0260704	0.0964631	2.5498	Gastrectomy	2.69955
Oxalobacter_formigenes	0.00537263	0.0293159	2.56412	Gastrectomy	inf
Lactobacillus_fermentum	0.0188901	0.0764743	2.56415	Gastrectomy	3.22712
Bacteroides_faecis	0.00255714	0.0179528	2.56846	Gastrectomy	1.25151
Methanobrevibacter_smithii	0.0223259	0.0875593	2.57623	Gastrectomy	3.89529
Lachnospiraceae_bacterium_5_1_57FAA	0.00795334	0.0383902	2.59088	Control	-5.12114
Eggerthella_lenta	8.48697e-07	7.50806e-05	2.59303	Control	-4.40846
Prevotella_veroralis	0.0171339	0.0705018	2.60753	Gastrectomy	inf
Rothia_unclassified	0.0250857	0.0954017	2.62936	Gastrectomy	0.361926
Prevotella_denticola	0.00537263	0.0293159	2.73483	Gastrectomy	inf
Odoribacter_laneus	0.0171339	0.0705018	2.75754	Gastrectomy	inf
Prevotella_buccae	0.000486642	0.00581653	2.80355	Gastrectomy	inf
Bacteroidales_bacterium_ph8	0.000625806	0.00654489	2.81938	Gastrectomy	2.71729
Catenibacterium_mitsuokai	0.0069917	0.0365607	2.89043	Gastrectomy	1.27259
Eubacterium_ramulus	0.00375888	0.0230117	2.90002	Gastrectomy	1.30725
Lactobacillus_gasseri	0.00846525	0.0400901	2.91153	Gastrectomy	3.15063
Bifidobacterium_dentium	0.000894922	0.00863944	2.91961	Control	-1.0434
Haemophilus_sputorum	0.00537263	0.0293159	2.92375	Gastrectomy	inf
Bacteroides_finegoldii	0.00570519	0.0304681	2.93427	Gastrectomy	0.233003
Streptococcus_anginosus	6.9892e-06	0.00022488	2.94338	Gastrectomy	4.07186
Veillonella_parvula	7.16748e-06	0.00022488	2.95092	Gastrectomy	0.556691
Eggerthella_unclassified	2.34698e-05	0.000654546	2.95369	Control	-2.27898
Veillonella_atypica	8.97378e-07	7.50806e-05	3.13411	Gastrectomy	1.6609
Coprobacillus_unclassified	3.95502e-05	0.000992711	3.15004	Control	-2.21266
Odoribacter_splanchnicus	0.000850091	0.00853491	3.15241	Gastrectomy	1.27876
Streptococcus_vestibularis	0.000143168	0.0025668	3.15968	Gastrectomy	1.69146
Eubacterium_biforme	0.00968389	0.0450121	3.19502	Gastrectomy	0.561184
Alistipes_shahii	0.000203549	0.00340605	3.26224	Gastrectomy	1.58884
Lactobacillus_salivarius	0.00793403	0.0383902	3.31533	Gastrectomy	2.70981
Clostridium_nexile	0.000125391	0.00252921	3.3524	Control	-5.11639
Eubacterium_eligens	0.0112255	0.0512293	3.41373	Gastrectomy	0.153831
Roseburia_hominis	5.80986e-06	0.00022488	3.43829	Gastrectomy	1.03533
Alistipes_onderdonkii	0.0141758	0.0624231	3.44981	Gastrectomy	2.26615
Ruminococcus_torques	0.00226851	0.0172544	3.50608	Control	-1.28274
Roseburia_inulinivorans	0.00417874	0.024973	3.51495	Gastrectomy	0.703576
Veillonella_unclassified	0.000512332	0.00583181	3.54147	Gastrectomy	1.12198
Streptococcus_parasanguinis	0.000130995	0.00252921	3.54316	Gastrectomy	0.849666
Bacteroides_cellulosilyticus	0.000534389	0.00583181	3.66709	Gastrectomy	4.54084
Akkermansia_muciniphila	0.00165838	0.0134275	3.71356	Gastrectomy	2.28459
Alistipes_putredinis	0.00729709	0.037379	3.80291	Gastrectomy	1.34407
Bacteroides_fragilis	0.0228416	0.0882036	3.83411	Control	-3.14075
Ruminococcus_gnavus	1.63494e-08	4.1037e-06	4.01047	Control	-3.66967
Bifidobacterium_longum	0.00750801	0.0376902	4.06056	Control	-2.37276
Streptococcus_salivarius	5.43343e-06	0.00022488	4.06644	Gastrectomy	1.59536
Klebsiella_pneumoniae	0.0025749	0.0179528	4.08609	Gastrectomy	2.14655
Prevotella_copri	0.0261334	0.0964631	4.59965	Gastrectomy	1.59083
b. KEGG modules annotated by in house pipeline
KEGG-gene based	p_valKW	FDR	LDA_score	enrichment	Log2FC	Definitions
M00281	0.000708905	0.00682912	2.01632	Gastrectomy	1.05981	PTS system, lactose-specific II component
M00708	0.000286638	0.00360167	2.03166	Gastrectomy	0.904359	Multidrug resistance, PatAB transporter
M00349	0.0109256	0.0410066	2.03308	Gastrectomy	0.462668	Microcin C transport system
M00518	0.00725691	0.0313022	2.03705	Gastrectomy	1.02746	GlnK-GlnL (glutamine utilization) two-component regulatory system
M00468	0.000574159	0.00595661	2.04423	Gastrectomy	0.932797	SaeS-SaeR (staphylococcal virulence regulation) two-component regulatory system
M00706	0.00188029	0.0143001	2.04915	Gastrectomy	1.13401	Multidrug resistance, EfrAB transporter
M00635	9.67145e-05	0.00177172	2.0948	Gastrectomy	0.64699	Tetracycline resistance, TetAB(46) transporter
M00220	0.000123214	0.00178055	2.11106	Gastrectomy	1.14956	Rhamnose transport system
M00530	0.000968862	0.00875004	2.11421	Gastrectomy	0.910392	Dissimilatory nitrate reduction, nitrate => ammonia
M00251	0.0318362	0.0877323	2.11466	Gastrectomy	0.123063	Teichoic acid transport system
M00767	0.00315402	0.0182641	2.12129	Gastrectomy	1.33133	Multidrug resistance, efflux pump OqxAB
M00323	0.000113659	0.00178055	2.12241	Gastrectomy	2.33805	Urea transport system
M00300	0.0180932	0.0574607	2.12575	Gastrectomy	0.500993	Putrescine transport system
M00648	0.0253579	0.0740245	2.12634	Gastrectomy	0.381144	Multidrug resistance, efflux pump MdtABC
M00589	0.0324822	0.0877323	2.13641	Gastrectomy	0.136167	Putative lysine transport system
M00088	0.00517173	0.024107	2.14196	Gastrectomy	0.656423	Ketone body biosynthesis, acetyl-CoA => acetoacetate/3-hydroxybutyrate/acetone
M00545	0.0168484	0.05471	2.15483	Gastrectomy	0.690243	Trans-cinnamate degradation, trans-cinnamate => acetyl-CoA
M00213	0.00463464	0.0223235	2.16645	Gastrectomy	0.475367	L-Arabinose transport system
M00471	0.00107446	0.00940964	2.17331	Gastrectomy	0.508669	NarX-NarL (nitrate respiration) two-component regulatory system
M00348	0.00953043	0.0387929	2.17768	Gastrectomy	0.480746	Glutathione transport system
M00227	0.00341155	0.0182641	2.1816	Gastrectomy	0.41402	Glutamine transport system
M00473	0.0139074	0.0482553	2.19072	Gastrectomy	0.536953	UhpB-UhpA (hexose phosphates uptake) two-component regulatory system
M00229	0.0149785	0.0497563	2.19235	Gastrectomy	0.4794	Arginine transport system
M00456	0.00348837	0.0182641	2.19255	Gastrectomy	1.01714	ArcB-ArcA (anoxic redox control) two-component regulatory system
M00241	0.00893486	0.0368882	2.19499	Gastrectomy	0.583243	Vitamin B12 transport system
M00445	0.00353906	0.0182641	2.19541	Gastrectomy	0.635444	EnvZ-OmpR (osmotic stress response) two-component regulatory system
M00176	0.0358424	0.0941676	2.19707	Gastrectomy	0.346799	Assimilatory sulfate reduction, sulfate => H2S
M00585	0.000326581	0.00393258	2.1977	Gastrectomy	0.886417	L-Cystine transport system
M00481	2.50096e-05	0.00065707	2.19947	Gastrectomy	0.983084	LiaS-LiaR (cell wall stress response) two-component regulatory system
M00436	0.0331323	0.0886597	2.20039	Gastrectomy	0.426963	Sulfonate transport system
M00226	0.0323304	0.0877323	2.20259	Gastrectomy	0.534724	Histidine transport system
M00754	2.33019e-05	0.00065707	2.20769	Gastrectomy	0.998098	Nisin resistance, phage shock protein homolog LiaH
M00246	0.021595	0.0652946	2.20848	Gastrectomy	0.510998	Nickel transport system
M00417	0.0101878	0.0394487	2.23557	Gastrectomy	0.5449	Cytochrome o ubiquinol oxidase
M00593	1.83508e-06	0.000185823	2.23942	Gastrectomy	1.48155	Inositol transport system
M00446	0.0017695	0.0142051	2.24763	Gastrectomy	0.585105	RstB-RstA two-component regulatory system
M00219	0.00884539	0.0368882	2.24949	Gastrectomy	1.42777	AI-2 transport system
M00709	0.0172082	0.0552574	2.25338	Gastrectomy	0.531536	Macrolide resistance, MacAB-TolC transporter
M00245	0.0186195	0.0578605	2.25746	Gastrectomy	0.48205	Cobalt/nickel transport system
M00739	0.0128318	0.0457826	2.26028	Gastrectomy	0.52938	Cationic peptide transport system
M00324	0.0140258	0.0482553	2.26658	Gastrectomy	0.467234	Dipeptide transport system
M00761	0.0104243	0.0396399	2.27272	Gastrectomy	0.739918	Undecaprenylphosphate alpha-L-Ara4N biosynthesis, UDP-GlcA => undecaprenyl phosphate alpha-L-Ara4N
M00711	0.0344468	0.0913314	2.28737	Gastrectomy	0.810666	Multidrug resistance, efflux pump MdtIJ
M00442	0.000647662	0.00645429	2.29215	Gastrectomy	0.985989	Putative hydroxymethylpyrimidine transport system
M00319	4.80401e-06	0.000277672	2.29414	Gastrectomy	1.26921	Manganese/zinc/iron transport system
M00429	0.00594971	0.0264533	2.29547	Gastrectomy	0.492665	Competence-related DNA transformation transporter
M00230	0.0047437	0.0224743	2.2995	Gastrectomy	0.675009	Glutamate/aspartate transport system
M00701	0.0101006	0.0394487	2.31392	Gastrectomy	0.427914	Multidrug resistance, efflux pump EmrAB
M00225	0.012041	0.0434982	2.32013	Gastrectomy	0.805517	Lysine/arginine/ornithine transport system
M00461	0.0216896	0.0652946	2.32736	Control	-2.49859	MtrB-MtrA (osmotic stress response) two-component regulatory system
M00023	0.0299899	0.0841464	2.33636	Control	-0.295751	Tryptophan biosynthesis, chorismate => tryptophan
M00521	0.00034303	0.00396543	2.34322	Gastrectomy	0.870411	CiaH-CiaR two-component regulatory system
M00120	0.000926942	0.00864149	2.34694	Gastrectomy	0.509656	Coenzyme A biosynthesis, pantothenate => CoA
M00444	0.00342674	0.0182641	2.34848	Gastrectomy	1.25002	PhoQ-PhoP (magnesium transport) two-component regulatory system
M00492	7.51468e-05	0.00155124	2.35235	Gastrectomy	1.14017	LytS-LytR two-component regulatory system
M00744	0.00342674	0.0182641	2.35567	Gastrectomy	1.25002	Cationic antimicrobial peptide (CAMP) resistance, protease PgtE
M00172	0.000109234	0.00178055	2.35631	Gastrectomy	1.54492	C4-dicarboxylic acid cycle, NADP - malic enzyme type
M00318	1.18043e-05	0.000487347	2.39179	Gastrectomy	1.2125	Iron/zinc/manganese/copper transport system
M00307	1.48311e-07	4.28618e-05	2.39216	Gastrectomy	1.30353	Pyruvate oxidation, pyruvate => acetyl-CoA
M00117	0.00217657	0.0146286	2.40163	Gastrectomy	0.72156	Ubiquinone biosynthesis, prokaryotes, chorismate => ubiquinone
M00646	0.00267843	0.0168275	2.40226	Gastrectomy	0.447887	Multidrug resistance, efflux pump AcrAD-TolC
M00223	0.00539688	0.0247571	2.40708	Gastrectomy	0.43043	Phosphonate transport system
M00447	0.00342438	0.0182641	2.42387	Gastrectomy	0.691584	CpxA-CpxR (envelope stress response) two-component regulatory system
M00728	0.00342438	0.0182641	2.42387	Gastrectomy	0.691584	Cationic antimicrobial peptide (CAMP) resistance, envelope protein folding and degrading factors DegP and DsbA
M00459	1.92896e-06	0.000185823	2.44587	Gastrectomy	1.38181	VicK-VicR (cell wall metabolism) two-component regulatory system
M00317	0.00140897	0.0119762	2.45562	Gastrectomy	1.78872	Manganese/iron transport system
M00727	0.0244554	0.0721185	2.46362	Gastrectomy	0.501049	Cationic antimicrobial peptide (CAMP) resistance, N-acetylmuramoyl-L-alanine amidase AmiA and AmiC
M00724	0.00203184	0.0146286	2.46423	Gastrectomy	1.62668	Cationic antimicrobial peptide (CAMP) resistance, palmitoyl transferase PagP
M00497	0.00980442	0.0393538	2.46472	Gastrectomy	0.704885	GlnL-GlnG (nitrogen regulation) two-component regulatory system
M00270	0.00215121	0.0146286	2.47623	Gastrectomy	0.504412	PTS system, trehalose-specific II component
M00121	0.0293931	0.0832806	2.48544	Gastrectomy	0.287128	Heme biosynthesis, glutamate => protoheme/siroheme
M00265	0.0102376	0.0394487	2.49862	Gastrectomy	0.499574	PTS system, glucose-specific II component
M00169	7.90872e-06	0.000380937	2.51348	Gastrectomy	0.977878	CAM (Crassulacean acid metabolism), light
M00150	0.00738437	0.0313836	2.5135	Gastrectomy	0.499403	Fumarate reductase, prokaryotes
M00166	0.00013259	0.0018247	2.52462	Gastrectomy	0.935599	Reductive pentose phosphate cycle, ribulose-5P => glyceraldehyde-3P
M00742	0.0324822	0.0877323	2.52824	Gastrectomy	0.186697	Aminoglycoside resistance, protease FtsH
M00006	0.00318517	0.0182641	2.55666	Control	-0.511834	Pentose phosphate pathway, oxidative phase, glucose 6P => ribulose 5P
M00063	0.0131288	0.0462711	2.56086	Gastrectomy	0.405962	CMP-KDO biosynthesis
M00740	0.0188555	0.0579705	2.58881	Gastrectomy	0.872406	Methylaspartate cycle
M00335	0.0186195	0.0578605	2.60358	Control	-0.146937	Sec (secretion) system
M00016	0.0387455	0.0990924	2.61818	Control	-0.185563	Lysine biosynthesis, succinyl-DAP pathway, aspartate => lysine
M00222	0.000577111	0.00595661	2.64478	Control	-0.161003	Phosphate transport system
M00188	0.0265602	0.0759991	2.64492	Gastrectomy	0.294604	NitT/TauT family transport system
M00095	1.47196e-05	0.000531746	2.66643	Gastrectomy	1.2066	C5 isoprenoid biosynthesis, mevalonate pathway
M00064	0.000189722	0.00249226	2.67975	Gastrectomy	0.707604	ADP-L-glycero-D-manno-heptose biosynthesis
M00048	0.0222224	0.0662089	2.68552	Gastrectomy	3.99593	Inosine monophosphate biosynthesis, PRPP + glutamine => IMP
M00026	0.00183186	0.0143001	2.68749	Control	-0.287742	Histidine biosynthesis, PRPP => histidine
M00572	0.00553037	0.0249731	2.69604	Gastrectomy	0.303297	Pimeloyl-ACP biosynthesis, BioC-BioH pathway, malonyl-ACP => pimeloyl-ACP
M00228	0.00361972	0.0183526	2.73496	Gastrectomy	0.912794	Putative glutamine transport system
M00212	0.0143469	0.0487796	2.73716	Gastrectomy	0.290899	Ribose transport system
M00209	4.09663e-05	0.000986604	2.74788	Gastrectomy	0.91161	Osmoprotectant transport system
M00096	0.00371285	0.0185002	2.77467	Control	-0.242126	C5 isoprenoid biosynthesis, non-mevalonate pathway
M00283	0.016361	0.0537312	2.78276	Gastrectomy	0.690216	PTS system, ascorbate-specific II component
M00454	0.00639728	0.0280124	2.83322	Control	-0.409999	KdpD-KdpE (potassium transport) two-component regulatory system
M00122	0.00453993	0.022238	2.83785	Control	-0.374244	Cobalamin biosynthesis, cobinamide => cobalamin
M00250	0.00215121	0.0146286	2.85935	Control	-0.872604	Lipopolysaccharide transport system
M00526	0.0120031	0.0434982	2.86378	Control	-0.256649	Lysine biosynthesis, DAP dehydrogenase pathway, aspartate => lysine
M00620	0.00215121	0.0146286	2.86608	Control	-0.546172	Incomplete reductive citrate cycle, acetyl-CoA => oxoglutarate
M00525	0.000497874	0.00553407	2.86642	Control	-0.232373	Lysine biosynthesis, acetyl-DAP pathway, aspartate => lysine
M00275	2.43e-05	0.00065707	2.87384	Gastrectomy	0.695987	PTS system, cellobiose-specific II component
M00157	0.00232934	0.0152995	2.89239	Control	-0.191546	F-type ATPase, prokaryotes and chloroplasts
M00002	0.00265646	0.0168275	2.9084	Control	-0.257302	Glycolysis, core module involving three-carbon compounds
M00019	0.0380024	0.0980597	2.92976	Control	-0.229007	Valine/isoleucine biosynthesis, pyruvate => valine / 2-oxobutanoate => isoleucine
M00570	0.0380024	0.0980597	2.92976	Control	-0.229007	Isoleucine biosynthesis, threonine => 2-oxobutanoate => isoleucine
M00527	9.8088e-05	0.00177172	2.96859	Control	-0.298296	Lysine biosynthesis, DAP aminotransferase pathway, aspartate => lysine
M00495	2.82803e-06	0.000204325	2.97622	Gastrectomy	1.28489	AgrC-AgrA (exoprotein synthesis) two-component regulatory system
M00256	4.54027e-05	0.00100934	2.99595	Control	-0.323209	Cell division transport system
M00793	0.00168909	0.0139471	3.1034	Control	-0.384764	dTDP-L-rhamnose biosynthesis
M00255	0.0117354	0.0434811	3.17708	Control	-0.574257	Lipoprotein-releasing system
M00535	0.000123222	0.00178055	3.18193	Control	-0.362451	Isoleucine biosynthesis, pyruvate => 2-oxobutanoate
c. KEGG modules annotated by HUMAnN2 pipeline
Uniref90-based	p_valKW	FDR	LDA_score	enrichment	Log2FC	Definitions
M00442	0.00183156	0.0169295	2.00845	Gastrectomy	0.867217	Putative hydroxymethylpyrimidine transport system
M00530	0.00380815	0.027133	2.01446	Gastrectomy	0.509028	Dissimilatory nitrate reduction, nitrate => ammonia
M00475	0.0231422	0.0746662	2.01683	Gastrectomy	0.467659	BarA-UvrY (central carbon metabolism) two-component regulatory system
M00488	0.0290849	0.0854611	2.01705	Gastrectomy	0.358818	DcuS-DcuR (C4-dicarboxylate metabolism) two-component regulatory system
M00213	0.00563568	0.0332311	2.01761	Gastrectomy	0.702847	L-Arabinose transport system
M00302	1.83267e-05	0.00294682	2.01981	Gastrectomy	4.09873	2-Aminoethylphosphonate transport system
M00230	0.0331316	0.0913792	2.02055	Gastrectomy	0.465727	Glutamate/aspartate transport system
M00656	0.0225179	0.0734773	2.02076	Control	-0.23712	VanS-VanR (VanB type vancomycin resistance) two-component regulatory system
M00227	0.0153233	0.0601891	2.03028	Gastrectomy	0.551998	Glutamine transport system
M00502	0.00993979	0.045938	2.03147	Gastrectomy	0.57539	GlrK-GlrR (amino sugar metabolism) two-component regulatory system
M00194	0.00983986	0.045938	2.03294	Gastrectomy	0.661621	Maltose/maltodextrin transport system
M00446	0.0155479	0.0601891	2.04144	Gastrectomy	0.851653	RstB-RstA two-component regulatory system
M00474	0.0283042	0.0848503	2.04266	Gastrectomy	0.480844	RcsC-RcsD-RcsB (capsule synthesis) two-component regulatory system
M00451	0.0195184	0.065444	2.0439	Gastrectomy	0.532064	BasS-BasR (antimicrobial peptide resistance) two-component regulatory system
M00761	0.00397192	0.0277224	2.04601	Gastrectomy	0.638238	Undecaprenylphosphate alpha-L-Ara4N biosynthesis, UDP-GlcA => undecaprenyl phosphate alpha-L-Ara4N
M00449	0.0327455	0.0910485	2.04916	Gastrectomy	0.651734	CreC-CreB (phosphate regulation) two-component regulatory system
M00229	0.00344692	0.0250818	2.05725	Gastrectomy	0.817132	Arginine transport system
M00739	0.00908882	0.0457114	2.05765	Gastrectomy	0.764148	Cationic peptide transport system
M00324	0.0190194	0.0646656	2.06234	Gastrectomy	0.474898	Dipeptide transport system
M00461	0.000420227	0.00741158	2.06377	Control	-2.72316	MtrB-MtrA (osmotic stress response) two-component regulatory system
M00200	0.00870704	0.0444449	2.06444	Control	-0.274387	Putative sorbitol/mannitol transport system
M00300	0.0116867	0.0488697	2.06871	Gastrectomy	0.719944	Putrescine transport system
M00722	0.0053766	0.032779	2.07106	Gastrectomy	0.500466	Cationic antimicrobial peptide (CAMP) resistance, ethanolaminephosphotransferase EptA
M00445	0.01618	0.0608082	2.07622	Gastrectomy	0.437192	EnvZ-OmpR (osmotic stress response) two-component regulatory system
M00481	0.00020672	0.00504986	2.07829	Gastrectomy	1.24727	LiaS-LiaR (cell wall stress response) two-component regulatory system
M00754	0.00020672	0.00504986	2.07829	Gastrectomy	1.24727	Nisin resistance, phage shock protein homolog LiaH
M00724	0.0174866	0.0615897	2.08264	Gastrectomy	0.731447	Cationic antimicrobial peptide (CAMP) resistance, palmitoyl transferase PagP
M00226	0.0190972	0.0646656	2.08515	Gastrectomy	0.707865	Histidine transport system
M00429	0.0109638	0.0486961	2.0941	Gastrectomy	0.275674	Competence-related DNA transformation transporter
M00764	0.0117354	0.0488697	2.10385	Control	-0.350645	PTS system, fructoselysine/glucoselysine-specific II component
M00095	0.000329409	0.00704111	2.11185	Gastrectomy	0.920491	C5 isoprenoid biosynthesis, mevalonate pathway
M00447	0.0175841	0.0615897	2.1122	Gastrectomy	0.629384	CpxA-CpxR (envelope stress response) two-component regulatory system
M00728	0.0175841	0.0615897	2.1122	Gastrectomy	0.629384	Cationic antimicrobial peptide (CAMP) resistance, envelope protein folding and degrading factors DegP and DsbA
M00117	0.00252294	0.0215712	2.1146	Gastrectomy	0.593305	Ubiquinone biosynthesis, prokaryotes, chorismate => ubiquinone
M00746	0.00511833	0.032779	2.11526	Gastrectomy	0.679472	Multidrug resistance, repression of porin OmpF
M00533	0.000771474	0.00938526	2.1224	Gastrectomy	1.97563	Homoprotocatechuate degradation, homoprotocatechuate => 2-oxohept-3-enedioate
M00307	0.000192751	0.00504986	2.14021	Gastrectomy	0.76481	Pyruvate oxidation, pyruvate => acetyl-CoA
M00723	0.00835055	0.043271	2.15193	Gastrectomy	0.841838	Cationic antimicrobial peptide (CAMP) resistance, ethanolaminephosphotransferase EptB
M00444	0.00940646	0.045938	2.15198	Gastrectomy	0.887287	PhoQ-PhoP (magnesium transport) two-component regulatory system
M00744	0.00940646	0.045938	2.15198	Gastrectomy	0.887287	Cationic antimicrobial peptide (CAMP) resistance, protease PgtE
M00349	0.000433426	0.00741158	2.16206	Gastrectomy	0.793923	Microcin C transport system
M00743	0.00720999	0.0391399	2.16588	Gastrectomy	0.587841	Aminoglycoside resistance, protease HtpX
M00453	0.000653013	0.00893322	2.1683	Gastrectomy	0.708207	QseC-QseB (quorum sensing) two-component regulatory system
M00225	0.0122936	0.0494635	2.17837	Gastrectomy	0.846129	Lysine/arginine/ornithine transport system
M00443	0.0101319	0.046069	2.1846	Control	-1.95582	SenX3-RegX3 (phosphate starvation response) two-component regulatory system
M00334	0.00546316	0.032779	2.18613	Gastrectomy	0.550824	Type VI secretion system
M00417	0.00226945	0.0199014	2.19334	Gastrectomy	0.879863	Cytochrome o ubiquinol oxidase
M00317	0.000463097	0.00754187	2.19508	Gastrectomy	1.49124	Manganese/iron transport system
M00456	0.00344388	0.0250818	2.20376	Gastrectomy	0.792974	ArcB-ArcA (anoxic redox control) two-component regulatory system
M00134	0.0254949	0.0799497	2.20492	Gastrectomy	0.308615	Polyamine biosynthesis, arginine => ornithine => putrescine
M00233	0.00984229	0.045938	2.20605	Control	-1.57494	Glutamate transport system
M00202	0.00258786	0.0215865	2.21518	Control	-0.424129	Oligogalacturonide transport system
M00344	0.00175814	0.0169295	2.21599	Gastrectomy	0.665222	Formaldehyde assimilation, xylulose monophosphate pathway
M00486	0.00608947	0.0352983	2.22837	Gastrectomy	0.754928	CitA-CitB (citrate fermentation) two-component regulatory system
M00605	0.00977752	0.045938	2.28055	Control	-0.263429	Glucose/mannose transport system
M00298	0.0156633	0.0601891	2.28193	Gastrectomy	0.474736	Multidrug/hemolysin transport system
M00166	0.000156156	0.00504986	2.29314	Gastrectomy	1.45499	Reductive pentose phosphate cycle, ribulose-5P => glyceraldehyde-3P
M00606	0.00639728	0.0364645	2.31523	Control	-0.291148	N,N'-Diacetylchitobiose transport system
M00206	0.00687493	0.037923	2.32185	Control	-0.291127	Cellobiose transport system
M00596	0.011473	0.0488697	2.32331	Control	-0.403052	Dissimilatory sulfate reduction, sulfate => H2S
M00589	0.0271071	0.0835193	2.3424	Gastrectomy	0.423624	Putative lysine transport system
M00223	0.000416197	0.00741158	2.3453	Gastrectomy	0.674091	Phosphonate transport system
M00228	0.0234742	0.0750297	2.35021	Gastrectomy	0.665159	Putative glutamine transport system
M00120	0.000795826	0.00938526	2.35183	Gastrectomy	0.593034	Coenzyme A biosynthesis, pantothenate => CoA
M00452	0.0013304	0.0137878	2.36568	Gastrectomy	0.980713	CusS-CusR (copper tolerance) two-component regulatory system
M00707	0.0120031	0.0488697	2.37442	Gastrectomy	0.380141	Multidrug resistance, MdlAB/SmdAB transporter
M00459	7.20531e-06	0.00246421	2.37984	Gastrectomy	1.04128	VicK-VicR (cell wall metabolism) two-component regulatory system
M00602	0.00655307	0.0367402	2.38492	Control	-0.293315	Arabinosaccharide transport system
M00277	0.000416197	0.00741158	2.38777	Control	-0.679264	PTS system, N-acetylgalactosamine-specific II component
M00250	0.0102376	0.046069	2.41884	Control	-0.362155	Lipopolysaccharide transport system
M00535	0.0299899	0.0861895	2.46556	Control	-0.0748845	Isoleucine biosynthesis, pyruvate => 2-oxobutanoate
M00267	0.00302508	0.0234082	2.4676	Control	-0.353656	PTS system, N-acetylglucosamine-specific II component
M00205	0.0017355	0.0169295	2.48305	Control	-0.537713	N-Acetylglucosamine transport system
M00335	0.00178308	0.0169295	2.49446	Gastrectomy	0.118748	Sec (secretion) system
M00222	0.016009	0.0608082	2.5582	Control	-0.0855624	Phosphate transport system
M00809	0.0318431	0.0907527	2.60409	Control	-0.360986	PTS system, glucose-specific II component
M00495	0.000186471	0.00504986	2.60501	Gastrectomy	1.19468	AgrC-AgrA (exoprotein synthesis) two-component regulatory system
M00122	0.00193312	0.0173981	2.62257	Control	-0.228205	Cobalamin biosynthesis, cobinamide => cobalamin
M00183	0.00410754	0.0280955	2.63116	Gastrectomy	0.155544	RNA polymerase, bacteria
M00014	0.0172436	0.0615897	2.67248	Gastrectomy	1.34827	Glucuronate pathway (uronate pathway)
M00159	0.00830906	0.043271	2.67974	Control	-0.297685	V/A-type ATPase, prokaryotes
M00454	0.0167199	0.0615897	2.71729	Control	-0.207536	KdpD-KdpE (potassium transport) two-component regulatory system
M00271	0.0186195	0.0643218	2.75175	Control	-0.24151	PTS system, beta-glucoside-specific II component
M00153	0.0117354	0.0488697	2.82678	Gastrectomy	0.353045	Cytochrome d ubiquinol oxidase
M00212	0.0112158	0.0488697	2.8837	Control	-0.25542	Ribose transport system
M00519	0.000865793	0.00987004	3.13574	Control	-0.351	YesM-YesN two-component regulatory system
M00033	0.00467814	0.0313711	3.17132	Gastrectomy	0.483278	Ectoine biosynthesis, aspartate => ectoine
M00196	0.0120031	0.0488697	3.20027	Control	-0.437768	Raffinose/stachyose/melibiose transport system
M00207	0.000611975	0.00872065	3.23802	Control	-0.481295	Putative multiple sugar transport system
d. Metabolome profiles
Metabolites	p_valKW	FDR	LDA_score	enrichment	Log2FC
C00628_2_5_Dihydroxybenzoate	0.00621439	0.0175084	2.02529	Control	-1.74965
C00357_N_Acetylglucosamine6_phosphate	1.3696e-06	4.17176e-05	2.03714	Control	-2.63043
C05771_Isopropanolamine	0.000286221	0.00181835	2.03767	Control	-0.682882
C05598_Phenaceturate	0.00111644	0.00489573	2.03893	Control	-5.2727
C00294_Inosine	0.00134397	0.00551197	2.04924	Control	-0.811221
C00581_Guanidinoacetate	0.000684231	0.00330882	2.06578	Control	-2.13885
f__Cysteine_glutathionedisulphide_Divalent	0.0189799	0.0409966	2.07322	Control	0.308002
f__Cysteine_glutathionedisulphide	0.0502734	0.0909679	2.10397	Gastrectomy	1.6498
C02614_Citramalate	0.00944258	0.0237163	2.11364	Control	-0.890161
C01152_3_Methylhistidine	0.00155344	0.00596175	2.12669	Control	-1.34286
C05123_Isethionate	0.00349742	0.0112496	2.15413	Control	-0.978846
C00156_p_Hydroxybenzoate	0.0129759	0.0298169	2.1795	Control	-5.1535
C00318_Carnitine	0.000825826	0.00387779	2.20075	Control	-0.624735
C08306_Hexylamine	0.0327752	0.0624656	2.21753	Control	-3.67549
C03793_N6_N6_N6_Trimethyllysine	0.0452185	0.0827729	2.2511	Control	-1.72386
C01996_Acetylcholine	2.19109e-06	4.17775e-05	2.26532	Control	-2.70542
C06524_Nornicotine	2.36357e-08	2.55265e-06	2.27122	Control	-5.6723
C00093_Glycerophosphate	5.80987e-05	0.000508756	2.2978	Control	-0.902126
f__2_Hydroxyoctanoate	0.0232554	0.0482743	2.30222	Control	-2.73928
C05660_5_Methoxyindoleacetate	0.00056101	0.00293173	2.30367	Control	-2.72037
C00864_Pantothenate	0.00036424	0.00214571	2.33099	Gastrectomy	2.05285
f__2_Hydroxypentanoate	0.00136229	0.00551729	2.3339	Control	-1.55999
C00003_NAD_	0.0038175	0.0117797	2.33427	Control	-1.11098
C11331_Leu_Leu_Tyr	0.0235412	0.0482743	2.36735	Control	-inf
C17714_Heptanoate	0.0258506	0.0523476	2.38204	Gastrectomy	1.72079
C02567_N1_Acetylspermine_div	0.000509647	0.00270698	2.39235	Control	-1.50089
C00383_Malonate	0.00641174	0.0175215	2.39715	Control	-1.10872
C00423_trans_Cinnamate	0.000323926	0.00198023	2.39753	Control	-1.74257
C00299_Uridine	0.0307264	0.059258	2.42211	Gastrectomy	0.620273
C00329_Glucosamine	0.00150215	0.00593534	2.44006	Gastrectomy	3.33067
C05584_4_Hydroxy_3_methoxymandelate	0.00640995	0.0175215	2.4425	Control	-5.10631
C00152_Asn	0.00644645	0.0175215	2.44766	Control	-1.30438
C00993_Ala_Ala	0.00064931	0.00318752	2.46342	Control	-1.02885
C11527_4_Hydroxymandelate	0.000158416	0.00116652	2.46673	Control	-5.63459
C00078_Trp	0.00320618	0.0107093	2.49898	Gastrectomy	0.726303
C00942_cGMP	0.0125467	0.0290366	2.51423	Control	-inf
C02713_N_Acetylmuramate	0.00670576	0.0175215	2.53164	Gastrectomy	3.8832
C16741_5_Hydroxylysine	0.000275996	0.0018091	2.54838	Control	-2.41055
C00295_Orotate	0.00102589	0.00461649	2.56518	Gastrectomy	3.93957
C01586_Hippurate	0.00314217	0.0107093	2.58382	Control	-4.86113
C02989_Methioninesulfoxide	1.67385e-06	4.17176e-05	2.62255	Gastrectomy	1.45345
C00233_4_Methyl_2_oxopentanoate	0.019529	0.0419032	2.63037	Gastrectomy	5.59541
C11284_3_Indolebutyrate	0.000154474	0.00116395	2.66216	Control	0.0674943
C00214_Thymidine	1.66631e-06	4.17176e-05	2.68335	Gastrectomy	1.3181
C00931_Porphobilinogen	0.00497634	0.014792	2.69788	Control	-6.81761
C05607_3_Phenyllactate	0.000638784	0.00318409	2.70337	Gastrectomy	3.26785
C02679_Dodecanoate	0.0439099	0.0808341	2.71567	Gastrectomy	1.70304
C00262_Hypoxanthine	7.65665e-07	2.7564e-05	2.73507	Gastrectomy	3.70422
C00483_Tyramine	0.0545175	0.0965227	2.73615	Gastrectomy	2.26298
C00064_Gln	0.0343432	0.064807	2.73746	Control	-0.312317
C00135_His	0.00598005	0.0169959	2.77387	Control	-0.588116
C00253_Nicotinate	1.44501e-06	4.17176e-05	2.77765	Gastrectomy	2.37914
C09815_Benzamide	2.41397e-05	0.000260709	2.77859	Gastrectomy	2.76778
C00116_Glycerol	0.000702205	0.0033458	2.79186	Gastrectomy	inf
C11003_2_4_Dimethylaniline	2.61251e-07	1.20941e-05	2.82727	Control	-inf
C00785_Urocanate	0.000370997	0.00214648	2.83809	Gastrectomy	5.06869
C00624_N_Acetylglutamate	0.00772366	0.0197045	2.84852	Gastrectomy	0.71929
C03264_2_Hydroxy_4_methylpentanoate	0.000487499	0.00267711	2.8956	Gastrectomy	2.80323
C00178_Thymine	0.00985845	0.0244976	2.91317	Gastrectomy	1.50918
C05582_Homovanillate	0.00698349	0.0181012	2.91416	Gastrectomy	0.759035
C05122_Taurocholate	2.90215e-05	0.000293843	2.94586	Control	-1.12167
C00077_Ornithine	0.027075	0.0541501	2.95937	Gastrectomy	0.945525
C00044_GTP	0.0125467	0.0290366	3.03765	Control	-inf
C00073_Met	0.000854393	0.00395462	3.06789	Gastrectomy	1.54232
C00065_Ser	0.00111816	0.00489573	3.06973	Gastrectomy	1.0694
C00300_Creatine	0.00320618	0.0107093	3.08006	Control	-0.633746
C11118_1_Methyl_2_pyrrolidinone	0.00158244	0.00596175	3.08868	Gastrectomy	2.10022
C00062_Arg	2.12975e-05	0.000237944	3.15684	Control	-1.41182
C02630_2_Hydroxyglutarate	0.00150165	0.00593534	3.18908	Gastrectomy	1.692
C02703_SerineO_sulfate	0.0125467	0.0290366	3.19378	Control	-inf
C01879_5_Oxoproline	7.81389e-06	0.000115077	3.25041	Gastrectomy	1.36888
C01921_Glycocholate	0.0110296	0.026869	3.29543	Control	-0.318628
C00106_Uracil	5.63775e-07	2.28329e-05	3.33563	Gastrectomy	4.42603
C04137_Octopine	0.0021194	0.00762985	3.341	Control	-6.36501
C00791_Creatinine	0.00408302	0.0124802	3.37349	Control	-2.64749
C00327_Citrulline	3.27454e-08	2.65237e-06	3.3796	Gastrectomy	2.15428
C00082_Tyr	0.000140743	0.00108573	3.40616	Gastrectomy	1.31757
C00385_Xanthine	2.61293e-07	1.20941e-05	3.49822	Gastrectomy	4.04852
C00245_Taurine	1.72753e-05	0.000207432	3.49837	Control	-1.49625
C00140_N_Acetylglucosamine	2.32097e-06	4.17775e-05	3.53456	Gastrectomy	3.77482
C00407_Ile	0.000116161	0.000917951	3.54822	Gastrectomy	1.3527
C04483_DCA	0.000449253	0.00255365	3.59394	Gastrectomy	0.940011
C00123_Leu	0.00487776	0.0146333	3.60661	Gastrectomy	0.795351
C00148_Pro	4.13696e-05	0.000382964	3.65465	Gastrectomy	1.40091
C00183_Val	0.00292431	0.0101879	3.65579	Gastrectomy	0.786894
C00695_Cholate	4.55041e-05	0.000409537	3.73755	Control	-1.23646
C00037_Gly	0.00651764	0.0175215	3.91903	Gastrectomy	0.955904
C00042_Succinate	0.0505377	0.0909679	3.98367	Gastrectomy	0.538634
C00025_Glu	0.017739	0.0390982	4.00716	Gastrectomy	0.385752
C00086_Urea	0.00010066	0.000815346	4.04482	Control	-2.31467
C00431_5_Aminovalerate	0.000238212	0.00160793	4.07362	Control	-1.4422
C00041_Ala	9.94721e-05	0.000815346	4.20651	Gastrectomy	1.41058
C00429_Dihydrouracil	1.41513e-09	4.58501e-07	4.64679	Control	-3.22137
Notes
significantly different species that were overlap from all samples analysis (control, n=56; gastrectomy, n=50)
overlap* microbiome features with similar enrichment pattern to the "originaly reported"
overlap* microbiome features with different enrichment pattern to the "originaly reported"
Only observed after exclussions
"originally reported" are the microbial features enrichment in comparison between the gastrectomy (n=50) and control (n=56) groups
*overlap: between different pipeline annotations
significantly different species that were overlap from all samples analysis (control, n=56; gastrectomy, n=50)
microbiome features that we disscuss the most
Only observed after exclussions
