# Supplementary material
Source: HighWire-hosted journal article supplement (https://gut.bmj.com/content/69/8/1404)
Supplement: inline-supplementary-material-18 [file inline-supplementary-material-18.xls]

## Sheet: MetaPhlAn2
Supplementary Table S11. Significantly different taxa between gastrectomy and control groups and their associated clinical information (annotation with MetaPhlAn2)
a. Phylum (statistically significant: LEfSe: P≤0.05; q≤0.1; LDA score≥2.0)
Phylum	P value	FDR	LDA score	Enriched in	Log2FC
Actinobacteria	0.000891803	0.00697804	4.51453	Control	-1.63263
Verrucomicrobia	0.00126874	0.00697804	3.82537	Gastrectomy	2.1537
Synergistetes	0.0184952	0.0678156	4.4363	Gastrectomy	3.70728
Proteobacteria	0.048316	0.132869	-	Gastrectomy	0.605417
Euryarchaeota	0.0847511	0.186452	-	Gastrectomy	3.2957
Fusobacteria	0.256854	0.4709	-	Control	-4.88479
Bacteroidetes	0.573257	0.900833	-	Gastrectomy	0.0726459
Candidatus_Saccharibacteria	0.806954	0.933295	-	Control	-2.36543
Firmicutes	0.829628	0.933295	-	Control	-0.0495895
Spirochaetes	0.933295	0.933295	-	Gastrectomy	2.49417
b. Class (statistically significant: LEfSe: P≤0.05; q≤0.1; LDA score≥2.0)
Class	P value	FDR	LDA score	Enriched in	Log2FC
Bacilli	1.54233e-05	0.000262197	4.25821	Gastrectomy	0.969444
Actinobacteria	0.000891803	0.0071895	4.51875	Control	-1.63263
Verrucomicrobiae	0.00126874	0.0071895	3.99733	Gastrectomy	2.1537
Gammaproteobacteria	0.00800678	0.0340288	4.40348	Gastrectomy	0.751267
Synergistia	0.0184952	0.0628836	4.34429	Gastrectomy	3.70728
Methanobacteria	0.0847511	0.240128	-	Gastrectomy	3.2957
Clostridia	0.224318	0.544773	-	Control	-0.172487
Fusobacteriia	0.256854	0.545816	-	Control	-4.88479
Deltaproteobacteria	0.393985	0.744193	-	Control	-0.209977
Epsilonproteobacteria	0.450642	0.757732	-	Gastrectomy	0.620381
Erysipelotrichia	0.490297	0.757732	-	Gastrectomy	0.058135
Bacteroidia	0.573257	0.812114	-	Gastrectomy	0.0726459
Candidatus_Saccharibacteria_noname	0.806954	0.934336	-	Control	-2.36543
Negativicutes	0.894269	0.934336	-	Control	-0.425431
Spirochaetia	0.933295	0.934336	-	Gastrectomy	2.49417
Betaproteobacteria	0.934336	0.934336	-	Control	-0.542522
c. Order (statistically significant: LEfSe: P≤0.05; q≤0.1; LDA score≥2.0)
Order	P value	FDR	LDA score	Enriched in	Log2FC
Lactobacillales	1.15538e-05	0.000277291	4.26244	Gastrectomy	0.980518
Verrucomicrobiales	0.00126874	0.0152248	3.96657	Gastrectomy	2.1537
Enterobacteriales	0.00578925	0.046314	4.38753	Gastrectomy	0.753667
Bifidobacteriales	0.0119796	0.0718774	4.4838	Control	-1.93502
Synergistales	0.0184952	0.0887768	3.74307	Gastrectomy	3.70728
Coriobacteriales	0.0242564	0.0970254	4.06581	Control	-0.632751
Aeromonadales	0.0829567	0.254253	-	Gastrectomy	3.03366
Methanobacteriales	0.0847511	0.254253	-	Gastrectomy	3.2957
Actinomycetales	0.205626	0.538364	-	Control	-0.312128
Clostridiales	0.224318	0.538364	-	Control	-0.172487
Fusobacteriales	0.256854	0.56041	-	Control	-4.88479
Neisseriales	0.291566	0.583131	-	Gastrectomy	1.61039
Desulfovibrionales	0.393985	0.727357	-	Control	-0.209977
Campylobacterales	0.450642	0.772529	-	Gastrectomy	0.620381
Erysipelotrichales	0.490297	0.782235	-	Gastrectomy	0.058135
Pasteurellales	0.52149	0.782235	-	Gastrectomy	0.333069
Bacteroidales	0.573257	0.809304	-	Gastrectomy	0.0726459
Pseudomonadales	0.633558	0.844744	-	Gastrectomy	1.39513
Candidatus_Saccharibacteria_noname	0.806954	0.93315	-	Control	-2.36543
Bacillales	0.857743	0.93315	-	Control	-0.913347
Caudovirales	0.864725	0.93315	-	Gastrectomy	5.78213
Burkholderiales	0.891503	0.93315	-	Control	-0.554017
Selenomonadales	0.894269	0.93315	-	Control	-0.425431
Spirochaetales	0.933295	0.933295	-	Gastrectomy	2.49417
d. Family (statistically significant: LEfSe: P≤0.05; q≤0.1; LDA score≥2.0)
Family	P value	FDR	LDA score	Enriched in	Log2FC
Streptococcaceae	0.000294535	0.00752961	4.09114	Gastrectomy	0.792984
Lactobacillaceae	0.000345737	0.00752961	3.8531	Gastrectomy	2.08368
Bacteroidales_noname	0.000460997	0.00752961	2.78937	Gastrectomy	2.10376
Verrucomicrobiaceae	0.00126874	0.015542	3.49488	Gastrectomy	2.1537
Rikenellaceae	0.00175232	0.0171727	4.04251	Gastrectomy	1.35849
Prevotellaceae	0.00347043	0.0283419	4.61246	Gastrectomy	0.956449
Enterobacteriaceae	0.00578925	0.0396393	4.39958	Gastrectomy	0.753667
Lachnospiraceae	0.00688435	0.0396393	4.20905	Control	-0.539611
Leptotrichiaceae	0.00728069	0.0396393	3.50226	Gastrectomy	0.426533
Bifidobacteriaceae	0.0119796	0.0586999	4.4345	Control	-1.93502
Synergistaceae	0.0184952	0.0782852	3.23916	Gastrectomy	3.70728
Leuconostocaceae	0.0191719	0.0782852	3.46928	Gastrectomy	2.57561
Coriobacteriaceae	0.0242564	0.0914278	3.38787	Control	-0.632751
Oxalobacteraceae	0.0280604	0.0982113	3.24881	Gastrectomy	3.92267
Bacteroidaceae	0.0415634	0.135774	-	Control	-0.468085
Oscillospiraceae	0.0625512	0.191563	-	Control	-0.566157
Aeromonadaceae	0.0728761	0.210055	-	Gastrectomy	3.06847
Clostridiales_Family_XI_Incertae_Sedis	0.0845848	0.218569	-	Control	-3.08002
Methanobacteriaceae	0.0847511	0.218569	-	Gastrectomy	3.2957
Micrococcaceae	0.132494	0.324611	-	Gastrectomy	0.0546275
Fusobacteriaceae	0.160001	0.373336	-	Control	-4.96056
Burkholderiales_noname	0.200172	0.437669	-	Gastrectomy	0.731318
Bacillaceae	0.205436	0.437669	-	Control	-1.38712
Veillonellaceae	0.276353	0.559075	-	Control	-0.613043
Neisseriaceae	0.291566	0.559075	-	Gastrectomy	1.61039
Corynebacteriaceae	0.310405	0.559075	-	Control	-2.90135
Peptostreptococcaceae	0.315408	0.559075	-	Gastrectomy	0.73402
Clostridiales_noname	0.319471	0.559075	-	Control	-0.737407
Porphyromonadaceae	0.342455	0.578631	-	Gastrectomy	0.0692
Eubacteriaceae	0.355484	0.580625	-	Gastrectomy	0.11807
Desulfovibrionaceae	0.393985	0.615364	-	Control	-0.209977
Siphoviridae	0.40187	0.615364	-	Gastrectomy	7.64899
Clostridiales_Family_XIII_Incertae_Sedis	0.415145	0.616428	-	Control	-0.44455
Campylobacteraceae	0.481552	0.686416	-	Gastrectomy	0.399484
Erysipelotrichaceae	0.490297	0.686416	-	Gastrectomy	0.058135
Pasteurellaceae	0.52149	0.709806	-	Gastrectomy	0.333069
Propionibacteriaceae	0.549936	0.728294	-	Gastrectomy	1.38661
Carnobacteriaceae	0.606115	0.781569	-	Gastrectomy	0.351274
Pseudomonadaceae	0.633558	0.796008	-	Gastrectomy	1.39513
Clostridiaceae	0.727777	0.881378	-	Control	-0.316307
Aerococcaceae	0.751233	0.881378	-	Control	-1.46329
Actinomycetaceae	0.755467	0.881378	-	Control	-1.49165
Acidaminococcaceae	0.791883	0.898654	-	Control	-0.01974
Candidatus_Saccharibacteria_noname	0.806954	0.898654	-	Control	-2.36543
Ruminococcaceae	0.84446	0.919523	-	Control	-0.0425768
Enterococcaceae	0.881057	0.937242	-	Control	-0.323587
Sutterellaceae	0.898987	0.937242	-	Control	-0.586258
Brachyspiraceae	0.933295	0.952739	-	Gastrectomy	2.49417
Bacillales_noname	0.97936	0.97936	-	Control	-0.887391
e. Genus (statistically significant: LEfSe: P≤0.05; q≤0.1; LDA score ≥2.0)
Genus	P value	FDR	LDA score	Enriched in	Log2FC
Blautia	1.13403e-06	0.000119073	4.20113	Control	-1.76113
Eggerthella	1.17165e-05	0.000615115	2.96439	Control	-2.39999
Coprobacillus	1.87591e-05	0.000637504	2.98208	Control	-2.11122
Veillonella	2.42859e-05	0.000637504	3.72378	Gastrectomy	0.573521
Streptococcus	0.000219019	0.00459939	4.06948	Gastrectomy	0.796378
Lactobacillus	0.000345737	0.0060504	3.84776	Gastrectomy	2.08368
Bacteroidales_noname	0.000460997	0.00691495	2.84743	Gastrectomy	2.10376
Odoribacter	0.000604485	0.00793387	3.13745	Gastrectomy	1.25589
Atopobium	0.000944443	0.0110185	3.21531	Gastrectomy	0.265067
Akkermansia	0.00123857	0.013005	3.55527	Gastrectomy	2.1537
Prevotella	0.00143369	0.0136852	4.58599	Gastrectomy	0.998907
Alistipes	0.00160705	0.0140572	4.02191	Gastrectomy	1.35849
Oribacterium	0.00174042	0.0140572	3.41168	Gastrectomy	1.22903
Lachnospiraceae_noname	0.00188722	0.0141542	3.40993	Control	-1.07549
Anaerotruncus	0.00218662	0.0153064	2.85793	Control	-0.328042
Klebsiella	0.00386569	0.0250807	4.04835	Gastrectomy	1.85376
Roseburia	0.00406068	0.0250807	3.57741	Gastrectomy	0.187052
Catenibacterium	0.00655017	0.0382093	2.89094	Gastrectomy	0.591974
Bifidobacterium	0.00911566	0.050376	4.41715	Control	-1.93446
Coprococcus	0.0116292	0.0610535	3.18636	Gastrectomy	0.778851
Leptotrichiaceae_unclassified	0.0131668	0.0618317	3.73823	Gastrectomy	1.07708
Megasphaera	0.0132638	0.0618317	3.0412	Gastrectomy	0.0251115
Stomatobaculum	0.0135441	0.0618317	3.61992	Gastrectomy	2.46269
Anaerostipes	0.0167057	0.0730873	2.61551	Control	-0.308914
Scardovia	0.0214902	0.090259	3.13328	Gastrectomy	3.15161
Barnesiella	0.0270622	0.109124	-	Gastrectomy	1.5746
Oxalobacter	0.0280604	0.109124	-	Gastrectomy	3.92267
Aggregatibacter	0.0395761	0.145042	-	Gastrectomy	0.649511
Flavonifractor	0.0400591	0.145042	-	Control	-1.70053
Bacteroides	0.0422005	0.147702	-	Control	-0.468085
Subdoligranulum	0.048316	0.163651	-	Gastrectomy	0.609342
Turicibacter	0.0568882	0.186664	-	Control	-0.426813
Leptotrichia	0.0594139	0.189044	-	Control	-0.453674
Oscillibacter	0.0643569	0.194744	-	Control	-0.566157
Pyramidobacter	0.0649148	0.194744	-	Gastrectomy	0.456781
Butyricimonas	0.0703876	0.205297	-	Gastrectomy	2.52015
Aeromonas	0.0728761	0.206811	-	Gastrectomy	3.06847
Bulleidia	0.0802177	0.221654	-	Gastrectomy	0.998014
Raoultella	0.0851407	0.226521	-	Gastrectomy	2.98133
Methanobrevibacter	0.0865556	0.226521	-	Gastrectomy	3.25093
Megamonas	0.0884509	0.226521	-	Control	-3.59961
Gordonibacter	0.0921558	0.23039	-	Control	-1.75093
Neisseria	0.0956991	0.233684	-	Gastrectomy	1.88748
Alloscardovia	0.111823	0.266851	-	Control	-2.79453
Desulfovibrio	0.123739	0.288725	-	Gastrectomy	1.09419
Finegoldia	0.127269	0.290506	-	Control	-4.14765
Rothia	0.130858	0.291607	-	Gastrectomy	0.0546275
Parasutterella	0.133306	0.291607	-	Gastrectomy	0.668609
Fusobacterium	0.137296	0.294206	-	Control	-5.23512
Parvimonas	0.141721	0.297614	-	Control	-2.84297
Dialister	0.145204	0.298949	-	Control	-0.221299
Peptostreptococcaceae_noname	0.149599	0.302074	-	Gastrectomy	0.861025
Butyricicoccus	0.17568	0.348046	-	Control	-4.31843
Candidatus_Saccharibacteria_noname	0.180129	0.350251	-	Control	-3.95784
Burkholderiales_noname	0.200172	0.382146	-	Gastrectomy	0.731318
Bacillus	0.205436	0.384716	-	Control	-1.38712
Propionibacteriaceae_unclassified	0.208846	0.384716	-	Gastrectomy	1.7247
Slackia	0.259408	0.469618	-	Gastrectomy	0.106194
Paraprevotella	0.265381	0.472288	-	Control	-0.236361
Pseudoflavonifractor	0.271503	0.475131	-	Gastrectomy	1.04497
Holdemania	0.29005	0.499266	-	Control	-0.358594
Corynebacterium	0.310405	0.525686	-	Control	-2.90135
Parascardovia	0.336874	0.555828	-	Gastrectomy	4.31909
Pantoea	0.346773	0.555828	-	Gastrectomy	0.149892
Faecalibacterium	0.352188	0.555828	-	Control	-0.478633
Eubacterium	0.352199	0.555828	-	Gastrectomy	0.118079
Dorea	0.358591	0.555828	-	Control	-0.134829
Phascolarctobacterium	0.361349	0.555828	-	Gastrectomy	0.159746
Escherichia	0.365258	0.555828	-	Gastrectomy	0.40222
Bilophila	0.396831	0.593291	-	Control	-0.37424
Erysipelotrichaceae_noname	0.404938	0.593291	-	Gastrectomy	0.45222
Solobacterium	0.406828	0.593291	-	Control	-0.0431541
Clostridiales_Family_XIII_Incertae_Sedis_unclassified	0.419161	0.602903	-	Control	-0.159049
Clostridiales_Family_XIII_Incertae_Sedis_noname	0.444119	0.630169	-	Control	-1.90203
Clostridiales_noname	0.456482	0.639075	-	Gastrectomy	0.891299
Lactococcus	0.465767	0.643493	-	Control	-2.78284
Campylobacter	0.481552	0.6488	-	Gastrectomy	0.399484
Adlercreutzia	0.481966	0.6488	-	Control	-0.820133
Haemophilus	0.529771	0.704126	-	Gastrectomy	0.333622
Acidaminococcaceae_unclassified	0.574395	0.753894	-	Control	-4.58566
Ruminococcaceae_noname	0.583687	0.756632	-	Control	-1.42737
Granulicatella	0.59725	0.764772	-	Gastrectomy	0.352456
Pseudomonas	0.633558	0.801489	-	Gastrectomy	1.39513
Siphoviridae_noname	0.682982	0.845366	-	Gastrectomy	7.20045
Candidatus_Saccharibacteria_noname_unclassified	0.684344	0.845366	-	Control	-1.30864
Actinomyces	0.750212	0.896878	-	Control	-1.49165
Abiotrophia	0.751233	0.896878	-	Control	-1.46329
Clostridium	0.751669	0.896878	-	Control	-0.298009
Mitsuokella	0.763289	0.90051	-	Control	-0.263134
Parabacteroides	0.785514	0.906944	-	Control	-0.189306
Sutterellaceae_unclassified	0.787724	0.906944	-	Control	-0.775644
Acidaminococcus	0.794655	0.906944	-	Control	-0.374589
Coprobacter	0.815211	0.9204	-	Control	-0.99414
Ruminococcus	0.836098	0.933939	-	Control	-0.117087
Clostridiaceae_noname	0.864865	0.940125	-	Control	-0.274574
Peptostreptococcus	0.86561	0.940125	-	Control	-0.42407
Collinsella	0.869033	0.940125	-	Control	-0.405952
Enterococcus	0.881057	0.940125	-	Control	-0.323587
Enterobacter	0.889646	0.940125	-	Gastrectomy	0.46676
Actinobacillus	0.895357	0.940125	-	Control	-0.493267
Brachyspira	0.933295	0.962268	-	Gastrectomy	2.49417
Olsenella	0.934774	0.962268	-	Control	-0.582664
Citrobacter	0.957275	0.975862	-	Gastrectomy	2.15308
Gemella	0.969045	0.978363	-	Control	-0.887391
Sutterella	0.994773	0.994773	-	Control	-0.587384
f. Species (statistically significant: LEfSe: P≤0.05; q≤0.1; LDA score≥2.0. MaAsLin:P≤0.005; q≤0.1 )
Species	P value	FDR	LDA score	Enriched in	Log2FC	demographic association (coefficient)*	Adjusted coefficient**
Veillonella_atypica	9.28325e-07	7.85982e-05	2.96301	Gastrectomy	0.774329	Control- (-0.0277463)	Control- (-0.02816982)
Roseburia_hominis	7.24684e-06	0.000460174	3.29068	Gastrectomy	0.988528	Control- (-0.0327230), BMI- (-0.0046013)
Veillonella_parvula	9.51654e-06	0.00048344	2.86977	Gastrectomy	0.145681	Control- (-0.0203641)
Veillonella_dispar	2.0759e-05	0.000753254	2.32837	Gastrectomy	0.215172	Control- (-0.0135996)
Streptococcus_anginosus	4.86442e-05	0.00137285	2.93673	Gastrectomy	2.81681	Control- (-0.0073845)
Coprobacillus_unclassified	1.93271e-05	0.000753254	3.09278	Control	-2.11861	Control+ (0.0231651)	Control+ (0.02254875)
Alistipes_shahii	8.28286e-05	0.00210385	3.22424	Gastrectomy	1.49134	Control- (-0.0286356)
Eggerthella_unclassified	3.59357e-05	0.00114096	2.86865	Control	-2.13844	Control+ (0.0123971)	Control+ (0.01562804)
Streptococcus_salivarius	0.000135441	0.00312747	3.89889	Gastrectomy	0.791258	Control- (-0.0667774)	Control- (-0.0716668)
Streptococcus_vestibularis	0.000297767	0.00521473	3.06525	Gastrectomy	1.41973
Atopobium_parvulum	0.000629245	0.0070214	2.16081	Gastrectomy	0.263536	Control- (-0.0032702)
Prevotella_buccae	0.000649883	0.0070214	2.7506	Gastrectomy	6.69812
Bacteroides_cellulosilyticus	0.000240195	0.00469304	3.66764	Gastrectomy	3.89623
Streptococcus_parasanguinis	0.000776456	0.00788879	3.51669	Gastrectomy	0.635191	Control- (-0.0435846)	Control- (-0.056984201)
Clostridium_nexile	0.000325292	0.00521473	3.30367	Control	-4.87192	Control+ (0.0315328), BMI+ (0.00454193)
Akkermansia_muciniphila	0.00139631	0.0131357	3.61404	Gastrectomy	2.17801	BMI- (-0.000952356)
Odoribacter_splanchnicus	0.00220318	0.0174877	3.0255	Gastrectomy	1.01434
Streptococcus_tigurinus	0.000483902	0.00648764	2.4288	Gastrectomy	3.27088
Bacteroidales_bacterium_ph8	0.000485296	0.00648764	2.75186	Gastrectomy	2.04913	Control- (-0.0129281)
Veillonella_unclassified	0.00052962	0.00672617	3.50075	Gastrectomy	0.61009	Control- (-0.0412832)
Streptococcus_sobrinus	0.000593797	0.0070214	2.24428	Gastrectomy	3.30843
Alistipes_putredinis	0.00229719	0.0176814	3.79061	Gastrectomy	1.35544
Roseburia_inulinivorans	0.00236688	0.017682	3.48989	Gastrectomy	0.385818	Control- (-0.04402535)
Prevotella_histicola	0.00066344	0.0070214	2.29478	Gastrectomy	8.76924
Eubacterium_biforme	0.00260492	0.0189043	3.20622	Gastrectomy	0.684481
Blautia_producta	0.000888231	0.00867734	2.41566	Control	-4.93045	Control+ (0.0040122)
Streptococcus_gordonii	0.00334178	0.0224163	2.22193	Gastrectomy	0.754001	Age+ (0.000311930)
Bacteroides_faecis	0.00146359	0.0132768	2.67794	Gastrectomy	1.53983
Lactobacillus_salivarius	0.00401896	0.0251973	3.43623	Gastrectomy	0.729296	Stop drinking- (0.125842124)
Haemophilus_sputorum	0.00196641	0.0166062	2.33449	Gastrectomy	inf
Oribacterium_sinus	0.00202674	0.0166062	2.33857	Gastrectomy	1.143
Klebsiella_pneumoniae	0.00406728	0.0251973	4.08412	Gastrectomy	1.97874
Streptococcus_sanguinis	0.00456905	0.0269893	2.28213	Gastrectomy	0.860265
Lactobacillus_gasseri	0.00554563	0.031302	2.83656	Gastrectomy	3.39341
Prevotella_melaninogenica	0.00787243	0.038756	2.23211	Gastrectomy	10.0851
Prevotella_veroralis	0.00793431	0.038756	2.45855	Gastrectomy	inf
Prevotella_denticola	0.00918398	0.0436737	2.72734	Gastrectomy	4.37283
Eubacterium_eligens	0.00928497	0.0436737	3.20681	Gastrectomy	0.215052	BMI- (-0.00971098)
Lactobacillus_oris	0.0152119	0.0633412	2.26338	Gastrectomy	3.91584	Stop drinking+ (0.016780278)
Desulfovibrio_piger	0.0171991	0.0672089	2.17748	Gastrectomy	1.85772
Ruminococcus_gnavus	1.901e-08	4.82854e-06	4.05438	Control	-3.88585	Control+ (0.08650561),BMI+ (0.01075551)	Control+ (0.07327217)
Holdemania_unclassified	0.00423196	0.0255933	2.42571	Gastrectomy	1.80795
Eggerthella_lenta	8.48077e-07	7.85982e-05	2.46661	Control	-4.14514	Control+ (0.00509733)	Control+ (0.00633347)
Ruminococcus_torques	0.00495451	0.028601	3.52264	Control	-1.30026		Control+ ( 0.04320508)
Streptococcus_mutans	0.000197629	0.00418315	2.39988	Control	-0.855062	Age+ (0.0002317498)
Catenibacterium_mitsuokai	0.00673248	0.036394	2.71271	Gastrectomy	0.595032
Eubacterium_ramulus	0.00673433	0.036394	2.74508	Gastrectomy	0.503436
Scardovia_wiggsiae	0.00768805	0.038756	2.3308	Gastrectomy	3.18886
Clostridium_ramosum	0.000328487	0.00521473	2.51329	Control	-1.67786
Lactobacillus_reuteri	0.00793431	0.038756	3.61542	Gastrectomy	inf
Odoribacter_laneus	0.00793431	0.038756	2.59745	Gastrectomy	inf
Lachnospiraceae_bacterium_9_1_43BFAA	0.000430246	0.00642838	2.28577	Control	-7.2728
Anaerotruncus_colihominis	0.00160955	0.0140974	2.17136	Control	-0.992259
Bifidobacterium_longum	0.00271011	0.0191213	4.08851	Control	-2.33021	Control+ (0.0459304)	Control+ (0.05645226)
Megasphaera_micronuciformis	0.00335361	0.0224163	2.32828	Control	-1.14261
Bacteroides_finegoldii	0.0107602	0.048805	2.84622	Control	-0.0979577
Alistipes_onderdonkii	0.0110159	0.0490884	3.42724	Gastrectomy	1.97319
Alistipes_indistinctus	0.0127802	0.0559685	2.54616	Control	-0.680037	Stop drinking+ (0.039858577)
Stomatobaculum_longum	0.0147422	0.0633412	2.57408	Gastrectomy	2.4586
Fusobacterium_nucleatum	0.0150711	0.0633412	2.3986	Control	-0.115943
Bifidobacterium_dentium	0.00370257	0.0241141	3.10379	Control	-1.7541	Age+ (0.0066663); BMI- (-0.002256887)
Blautia_hydrogenotrophica	0.0158557	0.0649573	2.21635	Control	-7.48384
Fusobacterium_varium	0.0100914	0.0466038	2.18273	Control	-inf
Rothia_unclassified	0.0171985	0.0672089	2.5326	Gastrectomy	-0.188609
Lachnospiraceae_bacterium_2_1_58FAA	0.0163261	0.0658226	2.54657	Control	-2.46357
Anaerostipes_unclassified	0.0202257	0.0775165	2.25972	Control	-2.2766
Slackia_piriformis	0.0206384	0.0775165	2.57018	Gastrectomy	0.568966
Lachnospiraceae_bacterium_5_1_57FAA	0.0207524	0.0775165	2.42032	Control	-4.80768
Lachnospiraceae_bacterium_5_1_63FAA	0.0211887	0.0779991	2.79285	Control	-2.33143
Clostridium_asparagiforme	0.023012	0.0835006	-	Gastrectomy	0.382807
Bacteroides_caccae	0.0234886	0.0840296	3.23308	Control	-0.213733
Barnesiella_intestinihominis	0.0285272	0.0994206	3.37982	Gastrectomy	1.54193
Actinomyces_graevenitzii	0.028831	0.0994206	2.79959	Control	-4.33179
Oxalobacter_formigenes	0.0289651	0.0994206	2.60446	Gastrectomy	4.58179
Subdoligranulum_unclassified	0.0299486	0.101426	-	Gastrectomy	0.632818
Erysipelotrichaceae_bacterium_21_3	0.0314185	0.105004	-	Control	-1.70988
Parabacteroides_johnsonii	0.0327743	0.106998	-	Gastrectomy	2.21894
Erysipelotrichaceae_bacterium_6_1_45	0.0328576	0.106998	-	Control	-4.94627
Alistipes_sp_AP11	0.0355314	0.11424	-	Gastrectomy	3.2636
Pyramidobacter_piscolens	0.0360287	0.114391	-	Gastrectomy	0.326331
Alistipes_senegalensis	0.0367115	0.11512	-	Control	-0.528247
Turicibacter_unclassified	0.0382548	0.118497	-	Control	-0.327733
Ruminococcus_obeum	0.039683	0.12144	-	Control	-0.0244225
Bacteroides_fragilis	0.0443759	0.134184	-	Control	-3.00886
Raoultella_ornithinolytica	0.0515574	0.154066	-	Gastrectomy	3.22284
Flavonifractor_plautii	0.0567815	0.163977	-	Control	-1.70553
Bacteroides_nordii	0.0568335	0.163977	-	Gastrectomy	2.08835
Lachnospiraceae_bacterium_1_4_56FAA	0.0572894	0.163977	-	Control	-3.98428	BMI+ (0.00204797)
Lachnospiraceae_bacterium_3_1_46FAA	0.0574564	0.163977	-	Gastrectomy	1.07378
Neisseria_unclassified	0.0583537	0.164687	-	Gastrectomy	1.59966
Peptostreptococcaceae_noname_unclassified	0.0619289	0.17207	-	Control	-0.766593
Haemophilus_influenzae	0.0630362	0.17207	-	Gastrectomy	1.35787
Coprococcus_sp_ART55_1	0.0638317	0.17207	-	Gastrectomy	3.09533
Gordonibacter_pamelaeae	0.0639011	0.17207	-	Control	-1.86978
Oscillibacter_unclassified	0.0643569	0.17207	-	Control	-0.564146
Megasphaera_unclassified	0.065172	0.172434	-	Gastrectomy	0.781555
Fusobacterium_ulcerans	0.0660798	0.173034	-	Control	-5.8117
Coprococcus_comes	0.0671591	0.173857	-	Control	-0.115766
Enterococcus_casseliflavus	0.0679692	0.173857	-	Gastrectomy	9.03746
Bifidobacterium_catenulatum	0.0684477	0.173857	-	Control	-4.53975
Butyricimonas_synergistica	0.0703876	0.177014	-	Gastrectomy	2.3643
Prevotella_copri	0.0809886	0.201678	-	Gastrectomy	1.05519
Turicibacter_sanguinis	0.0822411	0.202808	-	Control	-0.219761
Lactobacillus_fermentum	0.0842374	0.205734	-	Gastrectomy	1.47152
Methanobrevibacter_smithii	0.0921558	0.222929	-	Gastrectomy	3.00686
Megamonas_unclassified	0.0938886	0.224978	-	Control	-3.41435	BMI+ (0.0147650303)
Alistipes_finegoldii	0.0984797	0.233052	-	Gastrectomy	0.259228
Lachnospiraceae_bacterium_1_1_57FAA	0.099093	0.233052	-	Control	-1.81846
Methanobrevibacter_unclassified	0.100778	0.234842	-	Gastrectomy	5.92602
Lachnospiraceae_bacterium_8_1_57FAA	0.103384	0.238724	-	Gastrectomy	0.481777
Clostridium_citroniae	0.105894	0.242315	-	Gastrectomy	0.324729
Dorea_longicatena	0.108155	0.245279	-	Control	-0.676937
Alloscardovia_omnicolens	0.111823	0.251112	-	Control	-2.79214	Stop drinking+ (0.060019237); Glucose- (-0.00061779)
Parabacteroides_goldsteinii	0.112704	0.251112	-	Gastrectomy	1.14714
Lachnospiraceae_bacterium_7_1_58FAA	0.116127	0.254728	-	Control	-0.61697
Megamonas_funiformis	0.116332	0.254728	-	Control	-2.46877
Dorea_formicigenerans	0.117933	0.256027	-	Gastrectomy	0.276348
Bacteroides_clarus	0.120616	0.258734	-	Gastrectomy	1.41613
Fusobacterium_mortiferum	0.121601	0.258734	-	Control	-5.43014
Parasutterella_excrementihominis	0.122237	0.258734	-	Gastrectomy	0.707086
Bacteroides_massiliensis	0.123461	0.259166	-	Control	-0.21674
Finegoldia_magna	0.127269	0.26497	-	Control	-4.23701
Erysipelotrichaceae_bacterium_2_2_44A	0.135183	0.279157	-	Control	-0.862911
Parvimonas_unclassified	0.139575	0.283436	-	Control	-2.82737
Burkholderiales_bacterium_1_1_47	0.140271	0.283436	-	Gastrectomy	0.756114
Anaerostipes_caccae	0.140602	0.283436	-	Gastrectomy	0.288707
Haemophilus_haemolyticus	0.144008	0.288016	-	Gastrectomy	1.95817
Lactobacillus_mucosae	0.145976	0.28967	-	Gastrectomy	0.829521	Stop drinking+ ( 0.015998102)
Ruminococcus_callidus	0.156971	0.30742	-	Gastrectomy	0.737702
Eubacterium_hallii	0.157564	0.30742	-	Control	-0.203177
Roseburia_intestinalis	0.158551	0.30742	-	Control	-0.957053
Bifidobacterium_pseudocatenulatum	0.159938	0.30776	-	Control	-3.75629
Paraprevotella_unclassified	0.166131	0.315582	-	Control	-0.210771
Butyricicoccus_pullicaecorum	0.167029	0.315582	-	Control	-4.50634
Prevotella_stercorea	0.167731	0.315582	-	Gastrectomy	0.684673
Megamonas_hypermegale	0.171883	0.318673	-	Control	-4.41799	BMI+ (0.007422018)
Megamonas_rupellensis	0.171883	0.318673	-	Control	-8.94288
Lactobacillus_vaginalis	0.176217	0.324341	-	Gastrectomy	2.74075	Smoking+ (0.015613607)
Anaerotruncus_unclassified	0.181859	0.332318	-	Gastrectomy	1.51491
Dialister_invisus	0.194175	0.352288	-	Control	-0.267373
Enterobacter_aerogenes	0.2009	0.361905	-	Gastrectomy	3.58299
Bacillus_subtilis	0.20944	0.372164	-	Control	-1.31672
Paraprevotella_clara	0.209525	0.372164	-	Control	-0.373511
Clostridium_perfringens	0.215027	0.379283	-	Gastrectomy	3.12298
Bacteroides_thetaiotaomicron	0.217022	0.380106	-	Gastrectomy	0.0144385
Streptococcus_lutetiensis	0.218486	0.380106	-	Gastrectomy	3.7132
Roseburia_unclassified	0.224654	0.388178	-	Control	-0.123115
Parvimonas_micra	0.238263	0.408911	-	Control	-3.67546
Eubacterium_rectale	0.247884	0.422568	-	Control	-0.121556
Clostridium_clostridioforme	0.255695	0.432978	-	Control	-3.07847
Alistipes_unclassified	0.259408	0.436355	-	Control	-1.64972
Clostridium_bartlettii	0.267583	0.447145	-	Gastrectomy	1.46512
Pseudoflavonifractor_capillosus	0.271503	0.44885	-	Gastrectomy	1.07249
Bacteroides_plebeius	0.272137	0.44885	-	Control	-0.370282
Clostridium_symbiosum	0.276214	0.452635	-	Control	-0.982646
Bacteroides_uniformis	0.294867	0.479476	-	Gastrectomy	0.260611
Atopobium_rimae	0.296369	0.479476	-	Control	-0.140316
Rothia_mucilaginosa	0.304199	0.487905	-	Control	-0.0819548
Streptococcus_infantis	0.305421	0.487905	-	Control	-0.692135
Paraprevotella_xylaniphila	0.313438	0.497583	-	Control	-0.223252
Coprococcus_catus	0.319362	0.503839	-	Gastrectomy	0.0058522
Pantoea_unclassified	0.324639	0.505879	-	Control	-0.57024
Erysipelotrichaceae_bacterium_3_1_53	0.324639	0.505879	-	Gastrectomy	1.24055
Streptococcus_agalactiae	0.335064	0.51894	-	Control	-0.678984
Lactobacillus_casei_paracasei	0.355745	0.547631	-	Gastrectomy	2.08031
Phascolarctobacterium_succinatutens	0.368755	0.56424	-	Gastrectomy	0.132079
Gemella_unclassified	0.376957	0.568408	-	Gastrectomy	0.0979187
Faecalibacterium_prausnitzii	0.37901	0.568408	-	Control	-0.499196
Desulfovibrio_desulfuricans	0.379439	0.568408	-	Control	-0.52284
Enterococcus_faecium	0.38043	0.568408	-	Control	-2.36137
Citrobacter_freundii	0.385086	0.571999	-	Gastrectomy	3.43201
Bifidobacterium_animalis	0.394813	0.57369	-	Control	-1.30204
Bacteroides_eggerthii	0.399423	0.57369	-	Control	-0.45366
Clostridium_leptum	0.402363	0.57369	-	Control	-0.137358
Streptococcus_intermedius	0.402828	0.57369	-	Gastrectomy	2.70004
Bacteroides_xylanisolvens	0.404659	0.57369	-	Control	-0.941696
Clostridium_hathewayi	0.405414	0.57369	-	Control	-2.5294
Parabacteroides_unclassified	0.408408	0.57369	-	Control	-0.275655
Lactococcus_lactis	0.40952	0.57369	-	Control	-0.506966
Eubacterium_sp_3_1_31	0.40952	0.57369	-	Control	-2.70456
Gemella_sanguinis	0.413329	0.57369	-	Control	-1.97687
Anaerostipes_hadrus	0.413985	0.57369	-	Control	-0.329373
Bacteroides_ovatus	0.421281	0.57369	-	Control	-1.60744
Bilophila_unclassified	0.422148	0.57369	-	Control	-0.432565
Streptococcus_mitis_oralis_pneumoniae	0.422503	0.57369	-	Gastrectomy	0.722559
Bacteroides_vulgatus	0.42425	0.57369	-	Control	-0.108154
Bacteroides_stercoris	0.42504	0.57369	-	Control	-0.657484
Streptococcus_thermophilus	0.42609	0.57369	-	Control	-2.86129
Collinsella_tanakaei	0.42688	0.57369	-	Control	-2.11241
Ruminococcus_bromii	0.432403	0.577124	-	Control	-0.00749111
Bifidobacterium_breve	0.433979	0.577124	-	Control	-0.140334
Parabacteroides_merdae	0.45367	0.600168	-	Gastrectomy	0.176953
Bacteroides_salyersiae	0.491746	0.646841	-	Gastrectomy	0.598247
Adlercreutzia_equolifaciens	0.494757	0.646841	-	Control	-0.873288
Pseudomonas_unclassified	0.496811	0.646841	-	Control	-0.111407
Escherichia_coli	0.499137	0.646841	-	Gastrectomy	0.664773
Bifidobacterium_adolescentis	0.510177	0.657792	-	Control	-1.73269
Granulicatella_adiacens	0.514908	0.660538	-	Gastrectomy	0.208282
Gemella_haemolysans	0.523607	0.668323	-	Control	-0.349721
Haemophilus_parainfluenzae	0.542316	0.684244	-	Gastrectomy	0.326928	GastricAcidMed + (0.042783)
Clostridium_sp_ATCC_BAA_442	0.547781	0.684244	-	Control	-1.24986
Parabacteroides_distasonis	0.547784	0.684244	-	Control	-0.575143
Solobacterium_moorei	0.548517	0.684244	-	Control	-0.172047
Bacteroides_intestinalis	0.551148	0.684244	-	Gastrectomy	4.13111
Fusobacterium_periodonticum	0.552245	0.684244	-	Gastrectomy	1.58961
Ruminococcaceae_bacterium_D16	0.55633	0.68596	-	Control	-1.55173
Klebsiella_unclassified	0.579953	0.709366	-	Control	-0.545427
Bifidobacterium_bifidum	0.583687	0.709366	-	Control	-0.492034
Escherichia_unclassified	0.584955	0.709366	-	Control	-1.1636
Lactobacillus_crispatus	0.586484	0.709366	-	Control	-0.252508
Lachnospiraceae_bacterium_3_1_57FAA_CT1	0.591666	0.712243	-	Control	-0.756951
Acidaminococcus_fermentans	0.600669	0.719669	-	Control	-2.43677
Campylobacter_concisus	0.604572	0.719806	-	Gastrectomy	1.35771
Streptococcus_constellatus	0.60645	0.719806	-	Control	-1.12271
Enterococcus_faecalis	0.615933	0.72766	-	Gastrectomy	1.63338
Rothia_dentocariosa	0.6234	0.733073	-	Gastrectomy	0.216637
Eubacterium_brachy	0.629847	0.73724	-	Gastrectomy	0.700035
Streptococcus_cristatus	0.645977	0.747192	-	Gastrectomy	0.682135
Mitsuokella_multacida	0.646817	0.747192	-	Control	-1.85741
Peptostreptococcus_unclassified	0.647174	0.747192	-	Gastrectomy	0.997778
Clostridiales_bacterium_1_7_47FAA	0.655214	0.750453	-	Control	-0.136155
Ruminococcus_lactaris	0.655908	0.750453	-	Control	-0.181408
Citrobacter_unclassified	0.709514	0.808146	-	Gastrectomy	1.45356
Actinomyces_odontolyticus	0.718291	0.811236	-	Control	-0.455714
Eubacterium_ventriosum	0.718614	0.811236	-	Control	-0.477076
Abiotrophia_defectiva	0.728792	0.819084	-	Control	-1.43995
Acidaminococcus_unclassified	0.734893	0.822303	-	Control	-1.52219	Age- (-0.002329132)
Clostridium_bolteae	0.746647	0.831791	-	Control	-0.0613237
Odoribacter_unclassified	0.788457	0.874533	-	Gastrectomy	0.363977
Holdemania_filiformis	0.792211	0.874876	-	Control	-0.72087
Coprobacter_fastidiosus	0.802721	0.882646	-	Control	-0.867186
Enterobacter_cloacae	0.815186	0.892488	-	Control	-0.928651
Eubacterium_siraeum	0.82563	0.900043	-	Gastrectomy	1.28801
Megasphaera_elsdenii	0.84828	0.920782	-	Control	-2.58966
Clostridiaceae_bacterium_JC118	0.876035	0.94647	-	Control	-0.30824
Lactobacillus_delbrueckii	0.883124	0.94647	-	Gastrectomy	6.57384	Stop drinking+ (0.034920828)
Eubacterium_cylindroides	0.883124	0.94647	-	Gastrectomy	3.52741
Ruminococcus_sp_5_1_39BFAA	0.887018	0.94665	-	Control	-0.425661
Granulicatella_elegans	0.893147	0.949203	-	Gastrectomy	1.38331
Klebsiella_oxytoca	0.901559	0.95415	-	Control	-3.76699
Brachyspira_unclassified	0.914302	0.959751	-	Control	-0.941444
Gemella_morbillorum	0.918187	0.959751	-	Control	-1.89868
Bacteroides_coprophilus	0.918187	0.959751	-	Control	-1.96338
Bacteroides_dorei	0.926637	0.964614	-	Control	-1.03478
Collinsella_aerofaciens	0.93424	0.968559	-	Control	-0.433134
Dorea_unclassified	0.946001	0.976766	-	Gastrectomy	0.386048
Bilophila_wadsworthia	0.951034	0.977986	-	Control	-0.456635
Bacteroides_coprocola	0.959435	0.980126	-	Control	-1.01959
Acidaminococcus_intestini	0.960832	0.980126	-	Control	-1.53699
Streptococcus_australis	0.973579	0.985509	-	Gastrectomy	0.0649313
Sutterella_wadsworthensis	0.97387	0.985509	-	Control	-0.618876
Mitsuokella_unclassified	0.99046	0.998321	-	Gastrectomy	3.23034
Granulicatella_unclassified	1	1	-	Gastrectomy	0.224812
Peptostreptococcus_stomatis	1	1	-	Control	-1.88757
f. Species relative abundance that might be affected by confounding factors
Species	confounder	associations coefficient
		crude	adjusted	Crude - adjusted	with counfounder
Roseburia hominis	BMI	-0.032723	-0.0261482	0.0065748	-0.00460102
Ruminococcus gnavus	BMI	0.0865057	0.0732824	0.0132233	0.0107555
Notes
FC: Fold Change
FDR: P corrected value by Benjamini-Hochberg (BH) False Discovery Rate (FDR) analysis
LDA: Linear Discriminant Analysis
LEfSe: LDA effect size
Significantly different features
Features that were confirmed significant in two annotations methods
*Demographic information associated with the features and its association coefficient
**The demographic information were taken into account in calculating the features association with the patients group by MaAsLin (Control and Gastrectomy)
**The association coefficien will be displayed if the MaAsLin results conssisten to the LEfSe result
**The coefficient were adjusted by possible confounder (BMI, total cholesterol, diabetes medications, and gastric acids medications, gender, age)
+positive association; -negative association
	the differences between crude and adjusted coefficient were more than 10%
