# Supplementary material
Source: HighWire-hosted journal article supplement (https://gut.bmj.com/content/69/8/1404)
Supplement: inline-supplementary-material-19 [file inline-supplementary-material-19.xls]

## Sheet: Functional_profiles
Supplementary Table S12. Significantly different KEGG modules between gastrectomy and control groups and their associated demographic information (annotation by in house pipeline and HUMAnN2)
A. KEGG modules annotated by in-house pipeline (statistically significant: LEfSe: P≤0.05; q≤0.1; LDA score≥2.0. MaAsLin:P≤0.005; q≤0.1 )
Module	P value	FDR	LDA score	Enriched in	Log2FC	demographic association (coefficient)*	Adjusted coefficient**
md:M00459 VicK-VicR (cell wall metabolism) two-component regulatory system	5.61874e-05	0.00603753	2.26208	Gastrectomy	0.664124	Control- (-0.007529)
md:M00349 Microcin C transport system	7.37008e-05	0.00603753	2.13171	Gastrectomy	0.88485	Control- (-0.008659)
md:M00461 MtrB-MtrA (osmotic stress response) two-component regulatory system	7.92833e-05	0.00603753	2.07547	Control	-3.03774	Control+ (0.004667)
md:M00223 Phosphonate transport system	8.48859e-05	0.00603753	2.33428	Gastrectomy	0.646453	Control- (-0078539) BMI- (-0.0013048)
md:M00600 alpha-1,4-Digalacturonate transport system	8.8268e-05	0.00603753	-	Control	-1.99881	Control+ (0.003683)
md:M00302 2-Aminoethylphosphonate transport system	0.000193391	0.00942399	-	Gastrectomy	1.98745	Control- (-0.003134)
md:M00202 Oligogalacturonide transport system	0.000294535	0.00942399	2.26583	Control	-0.490525	Control+ (0.0050320)	Control+ (0.0075553)
md:M00807 PTS system, galactose-specific II component	0.000296289	0.00942399	-	Gastrectomy	0.774622
md:M00207 Putative multiple sugar transport system	0.000301822	0.00942399	3.21059	Control	-0.495945	Control+ (0.0137119)
md:M00323 Urea transport system	0.000302551	0.00942399	-	Gastrectomy	1.49605
md:M00468 SaeS-SaeR (staphylococcal virulence regulation) two-component regulatory system	0.000310865	0.00942399	-	Gastrectomy	1.43831
md:M00166 Reductive pentose phosphate cycle, ribulose-5P => glyceraldehyde-3P	0.000330666	0.00942399	2.25799	Gastrectomy	0.904159	Control- (-0.0101040)
md:M00453 QseC-QseB (quorum sensing) two-component regulatory system	0.000411811	0.0103025	2.11632	Gastrectomy	0.685098
md:M00452 CusS-CusR (copper tolerance) two-component regulatory system	0.000421741	0.0103025	2.26236	Gastrectomy	0.61705	Control- (-0.010978)
md:M00319 Manganese/zinc/iron transport system	0.00059524	0.0128922	-	Gastrectomy	0.177761
md:M00277 PTS system, N-acetylgalactosamine-specific II component	0.000603144	0.0128922	2.39726	Control	-0.663353
md:M00417 Cytochrome o ubiquinol oxidase	0.00071124	0.0135973	2.17131	Gastrectomy	0.954538
md:M00438 Nitrate/nitrite transport system	0.000715645	0.0135973	-	Gastrectomy	1.61256	Control- (-0.0031763)
md:M00307 Pyruvate oxidation, pyruvate => acetyl-CoA	0.000912248	0.0147162	2.041	Gastrectomy	0.506968	Control- ( -0.0048563), Age+ (0.0002252)
md:M00342 Bacterial proteasome	0.00103237	0.0147162	-	Control	-2.23921	Control+ (0.00303983) Age+ (0.0001525)
md:M00767 Multidrug resistance, efflux pump OqxAB	0.00109878	0.0147162	-	Gastrectomy	0.985217	Control- ( -0.0045944)
md:M00317 Manganese/iron transport system	0.00110484	0.0147162	2.17483	Gastrectomy	1.18993	Control- (-0.0079417)
md:M00495 AgrC-AgrA (exoprotein synthesis) two-component regulatory system	0.00110728	0.0147162	2.41877	Gastrectomy	0.500701	Control- (-0.0128615)
md:M00205 N-Acetylglucosamine transport system	0.0011168	0.0147162	2.4429	Control	-0.515526	Control+ (0.0065011)
md:M00551 Benzoate degradation, benzoate => catechol / methylbenzoate => methylcatechol	0.00113072	0.0147162	-	Gastrectomy	1.51251	Control- (-0.002461)BMI- ( -0.0004410)
md:M00519 YesM-YesN two-component regulatory system	0.0011939	0.0147162	3.00315	Control	-0.325199	Control+ (0.010770)
md:M00481 LiaS-LiaR (cell wall stress response) two-component regulatory system	0.00123828	0.0147162	-	Gastrectomy	0.581154
md:M00754 Nisin resistance, phage shock protein homolog LiaH	0.00123828	0.0147162	-	Gastrectomy	0.581154
md:M00743 Aminoglycoside resistance, protease HtpX	0.00124786	0.0147162	2.17905	Gastrectomy	0.695887
md:M00233 Glutamate transport system	0.0013127	0.0149647	2.26018	Control	-1.77576
md:M00095 C5 isoprenoid biosynthesis, mevalonate pathway	0.00137099	0.0150007	-	Gastrectomy	0.398916	Age+ (0.0004266)
md:M00635 Tetracycline resistance, TetAB(46) transporter	0.00140357	0.0150007	-	Gastrectomy	0.451005
md:M00722 Cationic antimicrobial peptide (CAMP) resistance, ethanolaminephosphotransferase EptA	0.0014781	0.0153185	2.04685	Gastrectomy	0.63211
md:M00791 Manganese/zinc transport system	0.00158354	0.0158818	-	Gastrectomy	0.288908
md:M00117 Ubiquinone biosynthesis, prokaryotes, chorismate => ubiquinone	0.00162533	0.0158818	2.06707	Gastrectomy	0.629985
md:M00761 Undecaprenylphosphate alpha-L-Ara4N biosynthesis, UDP-GlcA => undecaprenyl phosphate alpha-L-Ara4N	0.00169117	0.0160662	-	Gastrectomy	0.689684
md:M00443 SenX3-RegX3 (phosphate starvation response) two-component regulatory system	0.00182001	0.0168228	2.23594	Control	-2.21308	Age+ (0.0002290)
md:M00213 L-Arabinose transport system	0.00187899	0.0169109	-	Gastrectomy	0.755139
md:M00334 Type VI secretion system	0.00221359	0.0194114	2.12739	Gastrectomy	0.692143
md:M00344 Formaldehyde assimilation, xylulose monophosphate pathway	0.00257116	0.0215846	2.15984	Gastrectomy	0.573092
md:M00649 Multidrug resistance, efflux pump AdeABC	0.00260835	0.0215846	-	Gastrectomy	3.79583
md:M00533 Homoprotocatechuate degradation, homoprotocatechuate => 2-oxohept-3-enedioate	0.00272986	0.0215846	-	Gastrectomy	1.36667
md:M00655 AdeS-AdeR two-component regulatory system	0.00276317	0.0215846	-	Gastrectomy	3.79516
md:M00229 Arginine transport system	0.00277697	0.0215846	2.00548	Gastrectomy	0.737152
md:M00746 Multidrug resistance, repression of porin OmpF	0.00285483	0.0216967	2.08575	Gastrectomy	0.84383
md:M00400 p97-Ufd1-Npl4 complex	0.00311681	0.0223011	-	Gastrectomy	0.782285
md:M00403 HRD1/SEL1 ERAD complex	0.00311681	0.0223011	-	Gastrectomy	0.782285
md:M00502 GlrK-GlrR (amino sugar metabolism) two-component regulatory system	0.00315555	0.0223011	2.03276	Gastrectomy	0.663448
md:M00486 CitA-CitB (citrate fermentation) two-component regulatory system	0.00319518	0.0223011	2.16702	Gastrectomy	0.72622
md:M00445 EnvZ-OmpR (osmotic stress response) two-component regulatory system	0.00342103	0.0233998	2.08586	Gastrectomy	0.572951
md:M00194 Maltose/maltodextrin transport system	0.00362407	0.0243026	2.00781	Gastrectomy	0.699394
md:M00456 ArcB-ArcA (anoxic redox control) two-component regulatory system	0.00379898	0.0249364	2.13398	Gastrectomy	0.663302
md:M00225 Lysine/arginine/ornithine transport system	0.00387335	0.0249364	2.12017	Gastrectomy	0.873274
md:M00723 Cationic antimicrobial peptide (CAMP) resistance, ethanolaminephosphotransferase EptB	0.00400037	0.0249364	2.10226	Gastrectomy	0.855708
md:M00444 PhoQ-PhoP (magnesium transport) two-component regulatory system	0.00408316	0.0249364	2.1177	Gastrectomy	0.898545
md:M00744 Cationic antimicrobial peptide (CAMP) resistance, protease PgtE	0.00408316	0.0249364	2.1177	Gastrectomy	0.898545
md:M00300 Putrescine transport system	0.00421759	0.0253055	2.06793	Gastrectomy	0.81242
md:M00764 PTS system, fructoselysine/glucoselysine-specific II component	0.00466991	0.0275364	2.12823	Control	-0.424395
md:M00206 Cellobiose transport system	0.00495451	0.0286511	2.34412	Control	-0.341584	Age+ (0.0002302)
md:M00204 Trehalose/maltose transport system	0.00502651	0.0286511	-	Gastrectomy	0.742853
md:M00606 N,N'-Diacetylchitobiose transport system	0.00525471	0.0294608	2.34198	Control	-0.341015	Age+ (0.0002272)
md:M00568 Catechol ortho-cleavage, catechol => 3-oxoadipate	0.00570608	0.0314755	-	Gastrectomy	1.2405
md:M00226 Histidine transport system	0.00611314	0.0327956	2.03353	Gastrectomy	0.765211
md:M00183 RNA polymerase, bacteria	0.00613719	0.0327956	2.56916	Gastrectomy	0.100466
md:M00602 Arabinosaccharide transport system	0.00625641	0.0329184	2.36598	Control	-0.323985
md:M00451 BasS-BasR (antimicrobial peptide resistance) two-component regulatory system	0.00648229	0.0331848	2.00372	Gastrectomy	0.664692
md:M00530 Dissimilatory nitrate reduction, nitrate => ammonia	0.00650112	0.0331848	-	Gastrectomy	0.356134
md:M00442 Putative hydroxymethylpyrimidine transport system	0.00675386	0.0334784	-	Gastrectomy	0.633061	BMI- ( -0.0004725)
md:M00200 Putative sorbitol/mannitol transport system	0.00675441	0.0334784	2.07949	Control	-0.319813	Age+ (0.00016276)
md:M00605 Glucose/mannose transport system	0.00715099	0.033561	2.29626	Control	-0.30916	Age+ (0.00021954)
md:M00724 Cationic antimicrobial peptide (CAMP) resistance, palmitoyl transferase PagP	0.00730622	0.033561	2.04101	Gastrectomy	0.748949
md:M00241 Vitamin B12 transport system	0.00731171	0.033561	-	Gastrectomy	0.69833
md:M00192 Putative thiamine transport system	0.0073776	0.033561	-	Gastrectomy	0.721645
md:M00122 Cobalamin biosynthesis, cobinamide => cobalamin	0.00742686	0.033561	2.53135	Control	-0.204034
md:M00446 RstB-RstA two-component regulatory system	0.007448	0.033561	-	Gastrectomy	0.899341
md:M00196 Raffinose/stachyose/melibiose transport system	0.00756835	0.033561	3.1515	Control	-0.457531
md:M00474 RcsC-RcsD-RcsB (capsule synthesis) two-component regulatory system	0.00759642	0.033561	-	Gastrectomy	0.615493
md:M00475 BarA-UvrY (central carbon metabolism) two-component regulatory system	0.00765426	0.033561	2.00587	Gastrectomy	0.539816
md:M00521 CiaH-CiaR two-component regulatory system	0.00845698	0.0364163	-	Gastrectomy	0.38168
md:M00590 Erythritol transport system	0.00854255	0.0364163	-	Gastrectomy	1.06919
md:M00227 Glutamine transport system	0.00862492	0.0364163	-	Gastrectomy	0.456567	Control- (-0.002461)
md:M00721 Cationic antimicrobial peptide (CAMP) resistance, arnBCADTEF operon	0.00874794	0.0364853	-	Gastrectomy	0.619413
md:M00267 PTS system, N-acetylglucosamine-specific II component	0.00895455	0.0368971	2.35175	Control	-0.320949
md:M00739 Cationic peptide transport system	0.00960024	0.0390867	-	Gastrectomy	0.674454
md:M00535 Isoleucine biosynthesis, pyruvate => 2-oxobutanoate	0.010185	0.0409798	2.48081	Control	-0.115084
md:M00432 Leucine biosynthesis, 2-oxoisovalerate => 2-oxoisocaproate	0.0103726	0.0412492	2.42524	Control	-0.106995
md:M00335 Sec (secretion) system	0.0105632	0.0415244	2.3817	Gastrectomy	0.0643056
md:M00601 Putative chitobiose transport system	0.0110884	0.0430059	-	Gastrectomy	0.446268
md:M00473 UhpB-UhpA (hexose phosphates uptake) two-component regulatory system	0.0112908	0.0430059	-	Gastrectomy	0.442797
md:M00488 DcuS-DcuR (C4-dicarboxylate metabolism) two-component regulatory system	0.0113415	0.0430059	2.00786	Gastrectomy	0.508534
md:M00449 CreC-CreB (phosphate regulation) two-component regulatory system	0.0114865	0.0430059	2.01387	Gastrectomy	0.760935
md:M00645 Multidrug resistance, efflux pump SmeABC	0.0116946	0.0430059	-	Gastrectomy	0.497502
md:M00450 BaeS-BaeR (envelope stress response) two-component regulatory system	0.0116946	0.0430059	-	Gastrectomy	0.497502
md:M00648 Multidrug resistance, efflux pump MdtABC	0.0122109	0.0444268	-	Gastrectomy	0.503681
md:M00033 Ectoine biosynthesis, aspartate => ectoine	0.0123938	0.0446176	3.0858	Gastrectomy	0.391275
md:M00271 PTS system, beta-glucoside-specific II component	0.0131058	0.0466896	2.87933	Control	-0.401478
md:M00217 D-Allose transport system	0.0139021	0.0484725	2.01794	Gastrectomy	1.05226
md:M00728 Cationic antimicrobial peptide (CAMP) resistance, envelope protein folding and degrading factors DegP and DsbA	0.0141164	0.0484725	2.04612	Gastrectomy	0.554575
md:M00447 CpxA-CpxR (envelope stress response) two-component regulatory system	0.0141164	0.0484725	2.04612	Gastrectomy	0.554575
md:M00593 Inositol transport system	0.014315	0.0484725	-	Gastrectomy	0.514321
md:M00324 Dipeptide transport system	0.014315	0.0484725	-	Gastrectomy	0.454612
md:M00153 Cytochrome bd ubiquinol oxidase	0.0145695	0.0488506	2.80496	Gastrectomy	0.302302
md:M00610 PTS system, D-glucosaminate-specific II component	0.0166001	0.0551187	-	Control	-1.2275
md:M00120 Coenzyme A biosynthesis, pantothenate => CoA	0.0167662	0.0551352	2.30849	Gastrectomy	0.431317	Control- (-0.009852)
md:M00708 Multidrug resistance, PatAB transporter	0.0171853	0.0559748	-	Gastrectomy	0.208601	Age+ (0.0001945)
md:M00496 ComD-ComE (competence) two-component regulatory system	0.0179421	0.0578886	-	Gastrectomy	0.255685
md:M00230 Glutamate/aspartate transport system	0.0182435	0.0583109	-	Gastrectomy	0.520809
md:M00656 VanS-VanR (VanB type vancomycin resistance) two-component regulatory system	0.0191989	0.0607964	-	Control	-0.241156
md:M00603 Putative aldouronate transport system	0.0205401	0.0644471	2.89313	Control	-0.316082
md:M00477 EvgS-EvgA (acid and drug tolerance) two-component regulatory system	0.0209422	0.0651113	2.33766	Gastrectomy	1.53386	Total cholesterol - (-0.000188)
md:M00707 Multidrug resistance, MdlAB/SmdAB transporter	0.0212409	0.065445	2.30268	Gastrectomy	0.259544	Age+ (0.0003640), BMI- (-0.0013247)
md:M00497 GlnL-GlnG (nitrogen regulation) two-component regulatory system	0.0219344	0.0669783	2.07027	Gastrectomy	0.533988
md:M00518 GlnK-GlnL (glutamine utilization) two-component regulatory system	0.0223308	0.0675852	-	Gastrectomy	0.387261
md:M00014 Glucuronate pathway (uronate pathway)	0.0226197	0.0677167	2.62268	Gastrectomy	1.11519
md:M00080 Lipopolysaccharide biosynthesis, inner core => outer core => O-antigen	0.0227703	0.0677167	2.00521	Gastrectomy	0.370008
md:M00197 Putative fructooligosaccharide transport system	0.0242564	0.0715144	2.25529	Control	-0.220307
md:M00134 Polyamine biosynthesis, arginine => ornithine => putrescine	0.0271925	0.0794859	2.17556	Gastrectomy	0.266734
md:M00483 NreB-NreC (dissimilatory nitrate/nitrite reduction) two-component regulatory system	0.0280604	0.0813275	-	Gastrectomy	4.91202
md:M00701 Multidrug resistance, efflux pump EmrAB	0.0286405	0.0823113	2.3714	Gastrectomy	0.52849
md:M00458 ResE-ResD (aerobic and anaerobic respiration) two-component regulatory system	0.0290677	0.0828429	-	Gastrectomy	0.435064
md:M00514 TtrS-TtrR (tetrathionate respiration) two-component regulatory system	0.0307198	0.0868277	-	Gastrectomy	0.837421
md:M00809 PTS system, glucose-specific II component	0.0314144	0.0880633	2.44927	Control	-0.322467
md:M00298 Multidrug/hemolysin transport system	0.0345309	0.0960129	2.09957	Gastrectomy	0.274536	Age+ (0.00039848)
md:M00023 Tryptophan biosynthesis, chorismate => tryptophan	0.0356275	0.0982629	-	Control	-0.111202
md:M00555 Betaine biosynthesis, choline => betaine	0.0360524	0.0986394	-	Gastrectomy	0.624052
md:M00506 CheA-CheYBV (chemotaxis) two-component regulatory system	0.0367531	0.0997584	2.24135	Gastrectomy	0.29864
md:M00136 GABA biosynthesis, prokaryotes, putrescine => GABA	0.0371775	0.100116	-	Gastrectomy	0.427589
md:M00627 beta-Lactam resistance, Bla system	0.0379089	0.101288	-	Control	-0.306672
md:M00287 PTS system, galactosamine-specific II component	0.0390954	0.103648	-	Control	-0.254701
md:M00697 Multidrug resistance, efflux pump MdtEF-TolC	0.0419964	0.110483	-	Gastrectomy	0.696275
md:M00696 Multidrug resistance, efflux pump AcrEF-TolC	0.0436406	0.113932	-	Gastrectomy	0.450519
md:M00545 Trans-cinnamate degradation, trans-cinnamate => acetyl-CoA	0.044133	0.114345	-	Gastrectomy	0.627984
md:M00709 Macrolide resistance, MacAB-TolC transporter	0.0453404	0.11659	-	Gastrectomy	0.469773
md:M00711 Multidrug resistance, efflux pump MdtIJ	0.0461091	0.117681	-	Gastrectomy	0.428938
md:M00212 Ribose transport system	0.0468963	0.11793	-	Control	-0.210992
md:M00159 V/A-type ATPase, prokaryotes	0.0468963	0.11793	-	Control	-0.236888
md:M00219 AI-2 transport system	0.0508817	0.127018	-	Gastrectomy	0.538602
md:M00596 Dissimilatory sulfate reduction, sulfate => H2S	0.051264	0.127046	-	Control	-0.301119
md:M00668 Tetracycline resistance, TetA transporter	0.0546111	0.134367	-	Gastrectomy	2.34671
md:M00265 PTS system, glucose-specific II component	0.0551593	0.134746	-	Gastrectomy	0.235596
md:M00215 D-Xylose transport system	0.0559673	0.13575	-	Gastrectomy	0.418711
md:M00318 Iron/zinc/manganese/copper transport system	0.0580879	0.139902	-	Gastrectomy	2.54867
md:M00222 Phosphate transport system	0.0601563	0.14387	-	Control	-0.0802942
md:M00471 NarX-NarL (nitrate respiration) two-component regulatory system	0.062291	0.146088	-	Gastrectomy	0.437171
md:M00503 PgtB-PgtA (phosphoglycerate transport) two-component regulatory system	0.0626826	0.146088	-	Control	-0.109113
md:M00259 Heme transport system	0.0627895	0.146088	-	Gastrectomy	0.477365
md:M00006 Pentose phosphate pathway, oxidative phase, glucose 6P => ribulose 5P	0.0627922	0.146088	-	Control	-0.26015
md:M00429 Competence-related DNA transformation transporter	0.0664546	0.153564	-	Gastrectomy	0.123336
md:M00454 KdpD-KdpE (potassium transport) two-component regulatory system	0.0673972	0.154697	-	Control	-0.167081
md:M00088 Ketone body biosynthesis, acetyl-CoA => acetoacetate/3-hydroxybutyrate/acetone	0.0712383	0.162423	-	Gastrectomy	0.456409
md:M00253 Sodium transport system	0.0722737	0.163693	-	Control	-0.29559
md:M00529 Denitrification, nitrate => nitrogen	0.0743089	0.167195	-	Gastrectomy	0.633885
md:M00186 Tungstate transport system	0.0753595	0.168451	-	Gastrectomy	0.346581
md:M00191 Thiamine transport system	0.0762628	0.16854	-	Gastrectomy	0.392017
md:M00189 Molybdate transport system	0.0763851	0.16854	-	Control	-0.181256
md:M00435 Taurine transport system	0.0785066	0.172111	-	Gastrectomy	0.388816
md:M00228 Aspartate/glutamate/glutamine transport system	0.0840312	0.183049	-	Gastrectomy	0.238728
md:M00345 Formaldehyde assimilation, ribulose monophosphate pathway	0.0845782	0.183074	-	Control	-0.360066
md:M00216 Multiple sugar transport system	0.0857479	0.184439	-	Control	-0.538523
md:M00331 Type II general secretion pathway	0.0898647	0.192086	-	Gastrectomy	0.269068
md:M00362 Nucleotide sugar biosynthesis, prokaryotes	0.0960189	0.203966	-	Gastrectomy	0.0587739
md:M00359 Aminoacyl-tRNA biosynthesis, eukaryotes	0.0972894	0.204129	-	Gastrectomy	0.0665202
md:M00185 Sulfate/thiosulfate transport system	0.0972894	0.204129	-	Gastrectomy	0.154133	BMI- ( -0.0011756)
md:M00032 Lysine degradation, lysine => saccharopine => acetoacetyl-CoA	0.0989309	0.206307	-	Gastrectomy	1.3273
md:M00522 SalK-SalR two-component regulatory system	0.100631	0.20721	-	Gastrectomy	0.398246
md:M00020 Serine biosynthesis, glycerate-3P => serine	0.101181	0.20721	-	Gastrectomy	0.098893
md:M00250 Lipopolysaccharide transport system	0.101181	0.20721	-	Control	-0.249205
md:M00360 Aminoacyl-tRNA biosynthesis, prokaryotes	0.103844	0.20891	-	Gastrectomy	0.080665
md:M00706 Multidrug resistance, EfrAB transporter	0.103844	0.20891	-	Gastrectomy	0.201919
md:M00239 Peptides/nickel transport system	0.103844	0.20891	-	Control	-0.212214
md:M00150 Fumarate reductase, prokaryotes	0.110745	0.221491	-	Gastrectomy	0.207432
md:M00064 ADP-L-glycero-D-manno-heptose biosynthesis	0.113605	0.22589	-	Gastrectomy	0.196373
md:M00806 PTS system, maltose-specific II component	0.12101	0.239221	-	Gastrectomy	0.0932103
md:M00258 Putative ABC transport system	0.124075	0.243871	-	Control	-0.0743888
md:M00190 Iron(III) transport system	0.128786	0.251685	-	Control	-0.204571
md:M00499 HydH-HydG (metal tolerance) two-component regulatory system	0.131084	0.25472	-	Gastrectomy	0.346033
md:M00238 D-Methionine transport system	0.132003	0.255057	-	Control	-0.00633291
md:M00549 Nucleotide sugar biosynthesis, glucose => UDP-glucose	0.143756	0.276205	-	Gastrectomy	0.031661
md:M00330 Adhesin protein transport system	0.146781	0.280442	-	Gastrectomy	0.151183
md:M00188 NitT/TauT family transport system	0.15263	0.289997	-	Control	-0.0712472
md:M00492 LytS-LytR two-component regulatory system	0.154417	0.290237	-	Gastrectomy	0.223652
md:M00793 dTDP-L-rhamnose biosynthesis	0.154454	0.290237	-	Control	-0.104186
md:M00220 Rhamnose transport system	0.155371	0.290365	-	Gastrectomy	0.258403
md:M00278 PTS system, sorbose-specific II component	0.163854	0.304554	-	Gastrectomy	1.021
md:M00210 Phospholipid transport system	0.167687	0.306679	-	Gastrectomy	0.16699	Age- (-0.0003628)
md:M00121 Heme biosynthesis, plants and bacteria, glutamate => heme	0.167687	0.306679	-	Gastrectomy	0.0676649
md:M00620 Incomplete reductive citrate cycle, acetyl-CoA => oxoglutarate	0.167687	0.306679	-	Control	-0.0964938	Age- (-0.0002611), BMI+ (0.0009373)
md:M00589 Putative lysine transport system	0.169645	0.30861	-	Gastrectomy	0.212835
md:M00394 RNA degradosome	0.17162	0.310551	-	Gastrectomy	0.069221
md:M00157 F-type ATPase, prokaryotes and chloroplasts	0.173613	0.311277	-	Control	-0.055603
md:M00305 PTS system, 2-O-A-mannosyl-D-glycerate-specific II component	0.173842	0.311277	-	Gastrectomy	0.680604
md:M00472 NarQ-NarP (nitrate respiration) two-component regulatory system	0.182483	0.325048	-	Gastrectomy	0.373813
md:M00575 Pertussis pathogenicity signature, T1SS	0.187829	0.331502	-	Gastrectomy	1.20934
md:M00133 Polyamine biosynthesis, arginine => agmatine => putrescine => spermidine	0.188045	0.331502	-	Control	-0.183481
md:M00525 Lysine biosynthesis, acetyl-DAP pathway, aspartate => lysine	0.190177	0.333541	-	Control	-0.0371801	Age- (-0.0002090)
md:M00303 PTS system, N-acetylmuramic acid-specific II component	0.201104	0.349125	-	Gastrectomy	0.14884
md:M00115 NAD biosynthesis, aspartate => NAD	0.201104	0.349125	-	Control	-0.0553861	Age- ( -0.0003624), BMI+ (0.0013821)
md:M00646 Multidrug resistance, efflux pump AcrAD-TolC	0.204492	0.351439	-	Control	-0.259993
md:M00356 Methanogenesis, methanol => methane	0.204492	0.351439	-	Control	-0.332287
md:M00119 Pantothenate biosynthesis, valine/L-aspartate => pantothenate	0.219529	0.375213	-	Control	-0.048757
md:M00570 Isoleucine biosynthesis, threonine => 2-oxobutanoate => isoleucine	0.221914	0.375213	-	Control	-0.0392679
md:M00019 Valine/isoleucine biosynthesis, pyruvate => valine / 2-oxobutanoate => isoleucine	0.221914	0.375213	-	Control	-0.0392679
md:M00332 Type III secretion system	0.222714	0.375213	-	Gastrectomy	1.29506
md:M00280 PTS system, glucitol/sorbitol-specific II component	0.226741	0.380125	-	Control	-0.0524706
md:M00046 Pyrimidine degradation, uracil => beta-alanine, thymine => 3-aminoisobutanoate	0.227958	0.380301	-	Control	-0.216377
md:M00266 PTS system, maltose/glucose-specific II component	0.229182	0.380487	-	Control	-0.283268
md:M00357 Methanogenesis, acetate => methane	0.239135	0.395092	-	Control	-0.198504
md:M00272 PTS system, beta-glucoside (arbutin/salicin/cellobiose)-specific II component	0.249388	0.408089	-	Gastrectomy	0.0661343
md:M00279 PTS system, galactitol-specific II component	0.249388	0.408089	-	Control	-0.0904257
md:M00231 Octopine/nopaline transport system	0.261026	0.425099	-	Control	-0.85635
md:M00232 General L-amino acid transport system	0.265332	0.430041	-	Gastrectomy	0.274215
md:M00224 Fluoroquinolone transport system	0.266575	0.430041	-	Control	-0.00180376
md:M00144 NADH:quinone oxidoreductase, prokaryotes	0.281976	0.45275	-	Gastrectomy	0.177222	Age- (-0.0003776)
md:M00554 Nucleotide sugar biosynthesis, galactose => UDP-galactose	0.284816	0.455173	-	Control	-0.0705776
md:M00209 Osmoprotectant transport system	0.290555	0.462185	-	Control	-0.00463166
md:M00813 Lantibiotic transport system	0.293453	0.464634	-	Control	-0.387988
md:M00628 beta-Lactam resistance, AmpC system	0.298247	0.469556	-	Gastrectomy	0.758096
md:M00631 D-Galacturonate degradation (bacteria), D-galacturonate => pyruvate + D-glyceraldehyde 3P	0.299308	0.469556	-	Control	-0.051688
md:M00247 Putative ABC transport system	0.302264	0.472029	-	Gastrectomy	0.0571689
md:M00308 Semi-phosphorylative Entner-Doudoroff pathway, gluconate => glycerate-3P	0.308235	0.479165	-	Control	-0.0483264
md:M00585 L-Cystine transport system	0.311249	0.479492	-	Gastrectomy	0.164905
md:M00016 Lysine biosynthesis, succinyl-DAP pathway, aspartate => lysine	0.311249	0.479492	-	Control	-0.0254715	Age- (-0.0001845)
md:M00500 AtoS-AtoC (cPHB biosynthesis) two-component regulatory system	0.313861	0.480285	-	Gastrectomy	0.41072
md:M00715 Lincosamide resistance, efflux pump LmrB	0.314573	0.480285	-	Control	-0.989729
md:M00817 Lantibiotic transport system	0.326612	0.496451	-	Gastrectomy	0.130309
md:M00003 Gluconeogenesis, oxaloacetate => fructose-6P	0.328064	0.496451	-	Control	-0.300346
md:M00237 Branched-chain amino acid transport system	0.329743	0.496794	-	Gastrectomy	0.0472041	Age+ (0.0002953), BMI- (-0.0009869)
md:M00254 ABC-2 type transport system	0.332893	0.49934	-	Control	-0.0547206
md:M00729 Fluoroquinolone resistance, gyrase-protecting protein Qnr	0.348934	0.521116	-	Gastrectomy	0.0519127
md:M00365 C10-C20 isoprenoid biosynthesis, archaea	0.355219	0.526303	-	Gastrectomy	0.0721569
md:M00214 Methyl-galactoside transport system	0.355486	0.526303	-	Gastrectomy	0.0682117
md:M00283 PTS system, ascorbate-specific II component	0.362114	0.533806	-	Gastrectomy	0.154226
md:M00270 PTS system, trehalose-specific II component	0.372201	0.546321	-	Control	-0.0333522
md:M00581 Biotin transport system	0.375602	0.548957	-	Control	-0.156561
md:M00179 Ribosome, archaea	0.379022	0.551598	-	Gastrectomy	0.040896
md:M00251 Teichoic acid transport system	0.385919	0.559116	-	Gastrectomy	0.119905
md:M00448 CssS-CssR (secretion stress response) two-component regulatory system	0.387458	0.559116	-	Control	-0.126377
md:M00176 Assimilatory sulfate reduction, sulfate => H2S	0.392892	0.564576	-	Gastrectomy	0.0856515
md:M00249 Capsular polysaccharide transport system	0.395064	0.565321	-	Gastrectomy	0.365176
md:M00093 Phosphatidylethanolamine (PE) biosynthesis, PA => PS => PE	0.399941	0.567551	-	Gastrectomy	0.0639439	Age- ( -0.0002721)
md:M00124 Pyridoxal biosynthesis, erythrose-4P => pyridoxal-5P	0.399941	0.567551	-	Control	-0.130176
md:M00221 Putative simple sugar transport system	0.414264	0.580892	-	Gastrectomy	0.0362178	BMI- (-0.0012239)
md:M00333 Type IV secretion system	0.414264	0.580892	-	Gastrectomy	0.144942
md:M00762 Copper-processing system	0.414437	0.580892	-	Control	-0.101198
md:M00670 Mce transport system	0.417892	0.583344	-	Gastrectomy	0.126857	Age- ( -0.0004490)
md:M00193 Putative spermidine/putrescine transport system	0.421539	0.586042	-	Control	-0.0395312
md:M00211 Putative ABC transport system	0.428887	0.591782	-	Control	-0.218735
md:M00008 Entner-Doudoroff pathway, glucose-6P => glyceraldehyde-3P + pyruvate	0.43156	0.591782	-	Gastrectomy	0.103471
md:M00573 Biotin biosynthesis, BioI pathway, long-chain-acyl-ACP => pimeloyl-ACP => biotin	0.432589	0.591782	-	Control	-0.103959
md:M00439 Oligopeptide transport system	0.432589	0.591782	-	Control	-0.0330942	Age+ (0.0004379)
md:M00273 PTS system, fructose-specific II component	0.43631	0.594494	-	Control	-0.168687	Age+ (0.0004778)
md:M00017 Methionine biosynthesis, apartate => homoserine => methionine	0.443806	0.602308	-	Control	-0.0138327
md:M00669 gamma-Hexachlorocyclohexane transport system	0.447582	0.605031	-	Gastrectomy	0.120162	Age- (-0.0004425)
md:M00320 Lipopolysaccharide export system	0.451375	0.607757	-	Gastrectomy	0.116272	Age- (-0.0004969)
md:M00577 Biotin biosynthesis, BioW pathway, pimelate => pimeloyl-CoA => biotin	0.459017	0.615623	-	Control	-0.0855686
md:M00026 Histidine biosynthesis, PRPP => histidine	0.462865	0.618358	-	Control	-0.0264415
md:M00246 Nickel transport system	0.46673	0.618689	-	Control	-0.227495
md:M00061 D-Glucuronate degradation, D-glucuronate => pyruvate + D-glyceraldehyde 3P	0.46673	0.618689	-	Control	-0.00112986
md:M00236 Putative polar amino acid transport system	0.474515	0.62658	-	Gastrectomy	0.00521154
md:M00457 TctE-TctD (tricarboxylic acid transport) two-component regulatory system	0.478154	0.627266	-	Gastrectomy	0.40175
md:M00281 PTS system, lactose-specific II component	0.480399	0.627266	-	Gastrectomy	0.753787
md:M00526 Lysine biosynthesis, DAP dehydrogenase pathway, aspartate => lysine	0.482371	0.627266	-	Control	-0.0195717	Age- (-0.0001705)
md:M00245 Cobalt/nickel transport system	0.482371	0.627266	-	Control	-0.230917
md:M00299 Spermidine/putrescine transport system	0.490297	0.635157	-	Gastrectomy	0.0363794
md:M00198 Putative sn-glycerol-phosphate transport system	0.498292	0.643079	-	Control	-0.227097
md:M00169 CAM (Crassulacean acid metabolism), light	0.502316	0.645835	-	Gastrectomy	0.111998
md:M00096 C5 isoprenoid biosynthesis, non-mevalonate pathway	0.506357	0.648592	-	Control	-0.0112315	Age- (-0.0002496)
md:M00527 Lysine biosynthesis, DAP aminotransferase pathway, aspartate => lysine	0.510414	0.65135	-	Control	-0.024008	Age- (-0.0002707)
md:M00005 PRPP biosynthesis, ribose 5P => PRPP	0.51858	0.65931	-	Gastrectomy	0.014777
md:M00009 Citrate cycle (TCA cycle, Krebs cycle)	0.526814	0.662391	-	Gastrectomy	0.0383044
md:M00440 Nickel transport system	0.526814	0.662391	-	Gastrectomy	0.0390768
md:M00346 Formaldehyde assimilation, serine pathway	0.526814	0.662391	-	Control	-0.0244686	Age- (-0.0003016)
md:M00374 Dicarboxylate-hydroxybutyrate cycle	0.547684	0.68611	-	Gastrectomy	0.0347358
md:M00582 Energy-coupling factor transport system	0.568956	0.710157	-	Gastrectomy	0.116898
md:M00234 L-Cystine transport system	0.577574	0.715689	-	Gastrectomy	0.0247882	BMI- (-0.0011124)
md:M00361 Nucleotide sugar biosynthesis, eukaryotes	0.577574	0.715689	-	Control	-0.119621
md:M00123 Biotin biosynthesis, pimeloyl-ACP/CoA => biotin	0.590614	0.729206	-	Control	-0.0574936	Age- (-0.0004817)
md:M00455 TorS-TorR (TMAO respiration) two-component regulatory system	0.601836	0.740388	-	Gastrectomy	0.279256
md:M00816 NisK-NisR (lantibiotic biosynthesis) two-component regulatory system	0.612645	0.750984	-	Gastrectomy	0.063243
md:M00240 Iron complex transport system	0.630526	0.770142	-	Control	-0.0611259
md:M00208 Glycine betaine/proline transport system	0.635031	0.772883	-	Control	-0.182336
md:M00029 Urea cycle	0.639549	0.772883	-	Gastrectomy	0.0104472	Age+ (0.0003381)
md:M00051 Uridine monophosphate biosynthesis, glutamine (+ PRPP) => UMP	0.639549	0.772883	-	Control	-0.00534094
md:M00063 CMP-KDO biosynthesis	0.644081	0.775619	-	Gastrectomy	0.0693219	Age- (-0.0004166)
md:M00178 Ribosome, bacteria	0.662339	0.791987	-	Gastrectomy	0.0289569
md:M00172 C4-dicarboxylic acid cycle, NADP - malic enzyme type	0.662339	0.791987	-	Gastrectomy	0.07913	Age- (-0.0003983)
md:M00632 Galactose degradation, Leloir pathway, galactose => alpha-D-glucose-1P	0.666936	0.791987	-	Gastrectomy	0.0113535
md:M00747 Bacitracin transport system	0.666936	0.791987	-	Control	-0.0859692
md:M00022 Shikimate pathway, phosphoenolpyruvate + erythrose-4P => chorismate	0.676167	0.797411	-	Gastrectomy	0.0174113
md:M00552 D-galactonate degradation, De Ley-Doudoroff pathway, D-galactonate => glycerate-3P	0.676167	0.797411	-	Control	-0.0719006
md:M00002 Glycolysis, core module involving three-carbon compounds	0.685447	0.805577	-	Gastrectomy	0.020963
md:M00276 PTS system, mannose-specific II component	0.690105	0.808273	-	Control	-0.129745
md:M00256 Cell division transport system	0.694774	0.810965	-	Control	-0.0189616
md:M00550 Ascorbate degradation, ascorbate => D-xylulose-5P	0.704148	0.819111	-	Gastrectomy	0.12568
md:M00583 Putative peptide transport system	0.709882	0.821684	-	Gastrectomy	0.900731
md:M00504 DctB-DctD (C4-dicarboxylate transport) two-component regulatory system	0.71128	0.821684	-	Gastrectomy	1.23526
md:M00060 KDO2-lipid A biosynthesis, Raetz pathway, LpxL-LpxM type	0.713568	0.821684	-	Gastrectomy	0.0787634	Age- (-0.0005212)
md:M00348 Glutathione transport system	0.718294	0.82435	-	Gastrectomy	0.102769
md:M00175 Nitrogen fixation, nitrogen => ammonia	0.723031	0.827012	-	Control	-0.0800167
md:M00116 Menaquinone biosynthesis, chorismate => menaquinol	0.756477	0.862384	-	Gastrectomy	0.0834527
md:M00821 Multidrug resistance, efflux pump TriABC-TolC	0.761295	0.864248	-	Control	-0.0577066	Age- (-0.00036957)
md:M00082 Fatty acid biosynthesis, initiation	0.768742	0.864248	-	Control	-0.688081
md:M00727 Cationic antimicrobial peptide (CAMP) resistance, N-acetylmuramoyl-L-alanine amidase AmiA and AmiC	0.77091	0.864248	-	Control	-1.06499
md:M00125 Riboflavin biosynthesis, GTP => riboflavin/FMN/FAD	0.770957	0.864248	-	Gastrectomy	0.0302279	Age- (-0.0003062)
md:M00050 Guanine ribonucleotide biosynthesis IMP => GDP,GTP	0.775801	0.864248	-	Gastrectomy	0.0151812	Age- (-0.0002715)
md:M00571 AlgE-type Mannuronan C-5-Epimerase transport system	0.775801	0.864248	-	Control	-0.0541282	Age- (-0.0004291)
md:M00720 Multidrug resistance, efflux pump VexEF-TolC	0.775801	0.864248	-	Control	-0.0541282	Age- (-0.0004291)
md:M00490 MalK-MalR (malate transport) two-component regulatory system	0.792769	0.877357	-	Control	-0.588436
md:M00326 RTX toxin transport system	0.795265	0.877357	-	Control	-0.0515921	Age- (-0.0003707)
md:M00260 DNA polymerase III complex, bacteria	0.795265	0.877357	-	Control	-0.0152592
md:M00377 Reductive acetyl-CoA pathway (Wood-Ljungdahl pathway)	0.800152	0.879909	-	Gastrectomy	0.0553452
md:M00740 Methylaspartate cycle	0.814412	0.88752	-	Gastrectomy	0.0696489
md:M00255 Lipoprotein-releasing system	0.814857	0.88752	-	Gastrectomy	0.0690103	Age- (-0.0006085)
md:M00268 PTS system, alpha-glucoside-specific II component	0.814857	0.88752	-	Control	-0.0525623
md:M00034 Methionine salvage pathway	0.829628	0.900739	-	Control	-0.0363274
md:M00045 Histidine degradation, histidine => N-formiminoglutamate => glutamate	0.83951	0.904297	-	Control	-0.0930777	Age- (-0.0005995)
md:M00651 Vancomycin resistance, D-Ala-D-Lac type	0.84446	0.904297	-	Control	-0.035151
md:M00479 DesK-DesR (membrane lipid fluidity regulation) two-component regulatory system	0.845631	0.904297	-	Control	-0.792606
md:M00242 Zinc transport system	0.854379	0.904297	-	Gastrectomy	0.00944959	Age- (-0.0002697)
md:M00269 PTS system, sucrose-specific II component	0.854379	0.904297	-	Control	-0.0419507
md:M00275 PTS system, cellobiose-specific II component	0.854379	0.904297	-	Control	-0.0882204
md:M00199 L-Arabinose/lactose transport system	0.854379	0.904297	-	Control	-0.0443677
md:M00586 Putative S-methylcysteine transport system	0.859246	0.904297	-	Gastrectomy	0.52568
md:M00173 Reductive citrate cycle (Arnon-Buchanan cycle)	0.859347	0.904297	-	Gastrectomy	0.0125542
md:M00274 PTS system, mannitol-specific II component	0.859347	0.904297	-	Control	-0.155136
md:M00572 Pimeloyl-ACP biosynthesis, BioC-BioH pathway, malonyl-ACP => pimeloyl-ACP	0.864321	0.906741	-	Gastrectomy	0.0688661	Age- (-0.0001974)
md:M00339 RaxAB-RaxC type I secretion system	0.889266	0.930058	-	Gastrectomy	0.0133001	Age- (-0.0004185)
md:M00306 PTS system, fructose-specific II-like component	0.894266	0.932436	-	Gastrectomy	0.0435169
md:M00822 Multidrug resistance, efflux pump MexMN-OprM	0.899276	0.93481	-	Gastrectomy	0.0478508
md:M00172 C4-dicarboxylic acid cycle, NADP - malic enzyme type	0.903783	0.936648	-	Control	-2.07794
md:M00149 Succinate dehydrogenase, prokaryotes	0.909303	0.939521	-	Gastrectomy	0.0814283	Age- (-0.0004186)
md:M00140 C1-unit interconversion, prokaryotes	0.914322	0.941861	-	Gastrectomy	0.00451535
md:M00742 Aminoglycoside resistance, protease FtsH	0.919344	0.944191	-	Control	-0.0129829
md:M00565 Trehalose biosynthesis, D-glucose 1P => trehalose	0.924596	0.946742	-	Control	-0.407185
md:M00325 alpha-Hemolysin/cyclolysin transport system	0.929398	0.948818	-	Control	-0.0232733	Age- (-0.0004047)
md:M00491 arabinogalactan oligomer/maltooligosaccharide transport system	0.934429	0.951115	-	Control	-0.0181662
md:M00244 Putative zinc/manganese transport system	0.944487	0.952857	-	Control	-0.538215	BMI- (-0.0011948)
md:M00011 Citrate cycle, second carbon oxidation, 2-oxoglutarate => oxaloacetate	0.944499	0.952857	-	Gastrectomy	0.00772045
md:M00580 Pentose phosphate pathway, archaea, fructose 6P => ribose 5P	0.944499	0.952857	-	Control	-0.0877319
md:M00652 Vancomycin resistance, D-Ala-D-Ser type	0.949535	0.95512	-	Gastrectomy	0.0910851
md:M00657 VanS-VanR (VanE type vancomycin resistance) two-component regulatory system	0.962142	0.964963	-	Control	-0.00372354
md:M00436 Sulfonate transport system	0.984852	0.984852	-	Control	-0.0369468
B. KEGG modules annotated by HUMAnN2 pipeline (statistically significant: LEfSe: P≤0.05; q≤0.1; LDA score≥2.0. MaAsLin:P≤0.005; Fq≤0.1 )
Module	P value	FDR	LDA score	Enriched in	Log2FC	demographic association (coefficient)*	Adjusted coefficient**
md:M00319 Manganese/zinc/iron transport system	6.31164e-06	0.00096409	2.23501	Gastrectomy	0.201432	Control- (-0.008460)
md:M00307 Pyruvate oxidation, pyruvate => acetyl-CoA	6.60336e-06	0.00096409	2.36959	Gastrectomy	0.745772	Control- (-0.0083143)	Control- (-0.0091408)
md:M00459 VicK-VicR (cell wall metabolism) two-component regulatory system	1.7816e-05	0.00173409	2.37041	Gastrectomy	1.0562	Control- (-0.0098666)
md:M00593 Inositol transport system	4.26895e-05	0.00311633	2.21396	Gastrectomy	0.889256	Control- (-0.0062895)
md:M00495 AgrC-AgrA (exoprotein synthesis) two-component regulatory system	6.85823e-05	0.00400521	2.82573	Gastrectomy	0.220967	Control- (-0.0199622)
md:M00166 Reductive pentose phosphate cycle, ribulose-5P => glyceraldehyde-3P	9.6236e-05	0.00412834	2.54304	Gastrectomy	0.895737
md:M00535 Isoleucine biosynthesis, pyruvate => 2-oxobutanoate	9.93405e-05	0.00412834	3.18	Control	-0.369842	Control+ (0.01273140)
md:M00220 Rhamnose transport system	0.000122247	0.00412834	2.27272	Gastrectomy	1.00523	Control- (-0.0049812), BMI- (-0.0008944)
md:M00492 LytS-LytR two-component regulatory system	0.000138734	0.00412834	2.36649	Gastrectomy	1.02796	Control- (-0.0085194), BMI- (-0.0016061)
md:M00209 Osmoprotectant transport system	0.000153951	0.00412834	2.68273	Gastrectomy	0.4132	Control- (-0.0137921)
md:M00095 C5 isoprenoid biosynthesis, mevalonate pathway	0.000174624	0.00412834	2.55805	Gastrectomy	0.568213	Control- (-0.0120077)
md:M00318 Iron/zinc/manganese/copper transport system	0.00018341	0.00412834	2.31316	Gastrectomy	0.476351
md:M00169 CAM (Crassulacean acid metabolism), light	0.000183796	0.00412834	2.46091	Gastrectomy	0.69095	Control- (-0.0087139)
md:M00275 PTS system, cellobiose-specific II component	0.000230191	0.00480113	2.84296	Gastrectomy	0.443894	Control- (-0.0126099)
md:M00064 ADP-L-glycero-D-manno-heptose biosynthesis	0.000277022	0.00537526	2.69307	Gastrectomy	0.524328		Control- (-0.019050018)
md:M00222 Phosphate transport system	0.000294535	0.00537526	2.74188	Control	-0.182661	Control+ (0.00669298)
md:M00754 Nisin resistance, phage shock protein homolog LiaH	0.00039908	0.00679212	2.12311	Gastrectomy	0.639396
md:M00481 LiaS-LiaR (cell wall stress response) two-component regulatory system	0.000418693	0.00679212	2.11892	Gastrectomy	0.630973
md:M00646 Multidrug resistance, efflux pump AcrAD-TolC	0.000472822	0.00726653	2.5353	Gastrectomy	0.52121
md:M00527 Lysine biosynthesis, DAP aminotransferase pathway, aspartate => lysine	0.000499869	0.00729808	2.92232	Control	-0.306633
md:M00323 Urea transport system	0.000531553	0.00739111	2.14513	Gastrectomy	1.24097	Control- ( -0.0058842)
md:M00157 F-type ATPase, prokaryotes and chloroplasts	0.000617367	0.00800164	2.96841	Control	-0.224101
md:M00117 Ubiquinone biosynthesis, prokaryotes, chorismate => ubiquinone	0.000630266	0.00800164	2.48236	Gastrectomy	0.727998
md:M00446 RstB-RstA two-component regulatory system	0.00086403	0.010333	2.2822	Gastrectomy	0.557597
md:M00724 Cationic antimicrobial peptide (CAMP) resistance, palmitoyl transferase PagP	0.000884678	0.010333	2.48048	Gastrectomy	1.35522	Control- (-0.01230902)
md:M00793 dTDP-L-rhamnose biosynthesis	0.00104432	0.0113975	3.093	Control	-0.367717
md:M00227 Glutamine transport system	0.00105388	0.0113975	2.28738	Gastrectomy	0.334841
md:M00204 Trehalose/maltose transport system	0.00112983	0.011711	-	Gastrectomy	0.507811
md:M00525 Lysine biosynthesis, acetyl-DAP pathway, aspartate => lysine	0.0011939	0.011711	2.83214	Control	-0.233942
md:M00497 GlnL-GlnG (nitrogen regulation) two-component regulatory system	0.00121296	0.011711	2.55823	Gastrectomy	0.777877
md:M00302 2-Aminoethylphosphonate transport system	0.00124329	0.011711	2.17365	Gastrectomy	1.57253
md:M00230 Glutamate/aspartate transport system	0.00137921	0.0125853	2.37468	Gastrectomy	0.785341
md:M00744 Cationic antimicrobial peptide (CAMP) resistance, protease PgtE	0.00146842	0.0126112	2.34051	Gastrectomy	1.05152
md:M00444 PhoQ-PhoP (magnesium transport) two-component regulatory system	0.00146842	0.0126112	2.34071	Gastrectomy	1.05152
md:M00708 Multidrug resistance, PatAB transporter	0.00152239	0.012701	2.00504	Gastrectomy	0.0922369
md:M00213 L-Arabinose transport system	0.00164229	0.0130894	2.24462	Gastrectomy	0.552695
md:M00223 Phosphonate transport system	0.00165859	0.0130894	2.49089	Gastrectomy	0.493646	Control- ( -0.010065)
md:M00026 Histidine biosynthesis, PRPP => histidine	0.0017318	0.0131708	2.70199	Control	-0.325569	Control+ (0.0065742)
md:M00635 Tetracycline resistance, TetAB(46) transporter	0.00175911	0.0131708	2.08894	Gastrectomy	0.355751
md:M00471 NarX-NarL (nitrate respiration) two-component regulatory system	0.0021302	0.0152729	2.1729	Gastrectomy	0.375917	Control- ( -0.008885)
md:M00256 Cell division transport system	0.00214449	0.0152729	2.91731	Control	-0.275749	Control+ (0.0079561), BMI+ (0.0015233)
md:M00348 Glutathione transport system	0.00227199	0.0157958	2.28881	Gastrectomy	0.569574
md:M00445 EnvZ-OmpR (osmotic stress response) two-component regulatory system	0.0023716	0.0161048	2.21478	Gastrectomy	0.684331
md:M00241 Vitamin B12 transport system	0.00278165	0.0179177	2.29313	Gastrectomy	0.64859
md:M00417 Cytochrome o ubiquinol oxidase	0.0028425	0.0179177	2.3425	Gastrectomy	0.67694
md:M00447 CpxA-CpxR (envelope stress response) two-component regulatory system	0.00288402	0.0179177	2.4555	Gastrectomy	0.520683
md:M00728 Cationic antimicrobial peptide (CAMP) resistance, envelope protein folding and degrading factors DegP and DsbA	0.00288402	0.0179177	2.4555	Gastrectomy	0.520683
md:M00006 Pentose phosphate pathway, oxidative phase, glucose 6P => ribulose 5P	0.0030578	0.0186016	2.63281	Control	-0.560345
md:M00349 Microcin C transport system	0.00323463	0.0187548	2.20985	Gastrectomy	0.611409
md:M00521 CiaH-CiaR two-component regulatory system	0.00330144	0.0187548	2.23618	Gastrectomy	0.368346
md:M00701 Multidrug resistance, efflux pump EmrAB	0.00334904	0.0187548	2.4096	Gastrectomy	0.432463
md:M00225 Lysine/arginine/ornithine transport system	0.00336694	0.0187548	2.40263	Gastrectomy	0.746533
md:M00442 Putative hydroxymethylpyrimidine transport system	0.00345396	0.0187548	2.29796	Gastrectomy	0.585133
md:M00461 MtrB-MtrA (osmotic stress response) two-component regulatory system	0.003473	0.0187548	2.35811	Control	-2.60638
md:M00530 Dissimilatory nitrate reduction, nitrate => ammonia	0.0035541	0.0187548	2.14381	Gastrectomy	0.613663
md:M00468 SaeS-SaeR (staphylococcal virulence regulation) two-component regulatory system	0.00359681	0.0187548	2.08287	Gastrectomy	0.644681
md:M00317 Manganese/iron transport system	0.00393448	0.0201061	2.4826	Gastrectomy	1.31369		Control- ( -0.01459475)
md:M00473 UhpB-UhpA (hexose phosphates uptake) two-component regulatory system	0.00405125	0.0201061	2.32738	Gastrectomy	0.514212
md:M00212 Ribose transport system	0.00406254	0.0201061	2.78629	Gastrectomy	0.242946
md:M00194 Maltose/maltodextrin transport system	0.0043552	0.0209213	2.0659	Gastrectomy	0.403202
md:M00002 Glycolysis, core module involving three-carbon compounds	0.0044002	0.0209213	2.95093	Control	-0.257321
md:M00172 C4-dicarboxylic acid cycle, NADP - malic enzyme type	0.00450479	0.0209213	2.18932	Gastrectomy	0.975434
md:M00088 Ketone body biosynthesis, acetyl-CoA => acetoacetate/3-hydroxybutyrate/acetone	0.00452346	0.0209213	2.10997	Gastrectomy	0.402139
md:M00281 PTS system, lactose-specific II component	0.0045855	0.0209213	2.15694	Gastrectomy	0.732848	Age+ (0.0002374)
md:M00767 Multidrug resistance, efflux pump OqxAB	0.00511733	0.0227975	2.11364	Gastrectomy	0.636415
md:M00150 Fumarate reductase, prokaryotes	0.00515286	0.0227975	2.57465	Gastrectomy	0.461852
md:M00761 Undecaprenylphosphate alpha-L-Ara4N biosynthesis, UDP-GlcA => undecaprenyl phosphate alpha-L-Ara4N	0.00526528	0.0229472	2.33473	Gastrectomy	0.616816
md:M00518 GlnK-GlnL (glutamine utilization) two-component regulatory system	0.00584493	0.0250988	2.17289	Gastrectomy	1.05494
md:M00300 Putrescine transport system	0.00593401	0.025112	2.23697	Gastrectomy	0.708525
md:M00096 C5 isoprenoid biosynthesis, non-mevalonate pathway	0.00675441	0.0281755	2.74856	Control	-0.21527
md:M00572 Pimeloyl-ACP biosynthesis, BioC-BioH pathway, malonyl-ACP => pimeloyl-ACP	0.00688421	0.0283125	2.66299	Gastrectomy	0.226894
md:M00454 KdpD-KdpE (potassium transport) two-component regulatory system	0.00701653	0.0284559	2.79478	Control	-0.366991
md:M00545 Trans-cinnamate degradation, trans-cinnamate => acetyl-CoA	0.00774862	0.0309945	2.35885	Gastrectomy	0.610457
md:M00219 AI-2 transport system	0.00788832	0.0311269	2.30481	Gastrectomy	0.946876
md:M00063 CMP-KDO biosynthesis	0.00831266	0.0323639	2.61612	Gastrectomy	0.343102
md:M00648 Multidrug resistance, efflux pump MdtABC	0.00848561	0.0326026	2.25613	Gastrectomy	0.485257
md:M00233 Glutamate transport system	0.00878053	0.0332976	2.39366	Control	-2.03002
md:M00324 Dipeptide transport system	0.00894851	0.0333547	2.39897	Gastrectomy	0.44421
md:M00226 Histidine transport system	0.00902405	0.0333547	2.34725	Gastrectomy	0.596547
md:M00229 Arginine transport system	0.00963397	0.0347529	2.28612	Gastrectomy	0.488509
md:M00270 PTS system, trehalose-specific II component	0.00964035	0.0347529	2.39325	Gastrectomy	0.19393
md:M00721 Cationic antimicrobial peptide (CAMP) resistance, arnBCADTEF operon	0.0109228	0.0384371	2.20616	Gastrectomy	0.654895
md:M00585 L-Cystine transport system	0.010953	0.0384371	2.12042	Gastrectomy	0.491633
md:M00709 Macrolide resistance, MacAB-TolC transporter	0.0110572	0.0384371	2.28675	Gastrectomy	0.479258
md:M00739 Cationic peptide transport system	0.0115597	0.0397109	2.33874	Gastrectomy	0.475493
md:M00706 Multidrug resistance, EfrAB transporter	0.0131012	0.0444833	2.20933	Gastrectomy	0.891054
md:M00215 D-Xylose transport system	0.0135654	0.0455298	2.18637	Gastrectomy	0.382231
md:M00121 Heme biosynthesis, glutamate => heme	0.0140663	0.0466746	2.55813	Gastrectomy	0.220195
md:M00120 Coenzyme A biosynthesis, pantothenate => CoA	0.0164762	0.0540568	2.28906	Gastrectomy	0.319365
md:M00456 ArcB-ArcA (anoxic redox control) two-component regulatory system	0.0177037	0.0574387	2.1764	Gastrectomy	0.502176
md:M00475 BarA-UvrY (central carbon metabolism) two-component regulatory system	0.0182606	0.0585945	2.09653	Gastrectomy	0.325508
md:M00436 Sulfonate transport system	0.0188757	0.05991	2.26066	Gastrectomy	0.401878
md:M00265 PTS system, glucose-specific II component	0.0195268	0.0613099	2.43729	Gastrectomy	0.241161
md:M00526 Lysine biosynthesis, DAP dehydrogenase pathway, aspartate => lysine	0.0201974	0.0627408	2.83577	Control	-0.271114
md:M00342 Bacterial proteasome	0.0212135	0.0652037	2.27543	Control	-1.8955
md:M00019 Valine/isoleucine biosynthesis, pyruvate => valine / 2-oxobutanoate => isoleucine	0.0219624	0.0661137	2.95871	Control	-0.257672	Age- (-0.00047703)
md:M00570 Isoleucine biosynthesis, threonine => 2-oxobutanoate => isoleucine	0.0219624	0.0661137	2.95871	Control	-0.257672	Age- (-0.00047703)
md:M00008 Entner-Doudoroff pathway, glucose-6P => glyceraldehyde-3P + pyruvate	0.0230405	0.0686512	2.56132	Gastrectomy	0.236594
md:M00023 Tryptophan biosynthesis, chorismate => tryptophan	0.0234696	0.0689706	2.39305	Control	-0.365287
md:M00743 Aminoglycoside resistance, protease HtpX	0.0236201	0.0689706	2.50298	Gastrectomy	0.700008
md:M00711 Multidrug resistance, efflux pump MdtIJ	0.0241785	0.0694398	2.31726	Gastrectomy	0.733
md:M00283 PTS system, ascorbate-specific II component	0.0242564	0.0694398	2.7718	Gastrectomy	0.50619
md:M00335 Sec (secretion) system	0.0250658	0.0710604	2.58784	Control	-0.166587
md:M00198 Putative sn-glycerol-phosphate transport system	0.0258986	0.0720227	2.47356	Gastrectomy	0.510869
md:M00620 Incomplete reductive citrate cycle, acetyl-CoA => oxoglutarate	0.0258986	0.0720227	2.77314	Control	-0.427161
md:M00228 Aspartate/glutamate/glutamine transport system	0.0263239	0.0725148	2.58578	Gastrectomy	0.300118
md:M00394 RNA degradosome	0.0304305	0.083044	2.446	Control	-0.199341
md:M00196 Raffinose/stachyose/melibiose transport system	0.0314144	0.0841857	3.20763	Control	-0.607524
md:M00192 Putative thiamine transport system	0.0314255	0.0841857	2.24978	Gastrectomy	0.814064
md:M00555 Betaine biosynthesis, choline => betaine	0.0322583	0.0852994	2.07285	Gastrectomy	0.795059
md:M00657 VanS-VanR (VanE type vancomycin resistance) two-component regulatory system	0.0324254	0.0852994	2.57797	Gastrectomy	0.384234
md:M00742 Aminoglycoside resistance, protease FtsH	0.0345314	0.0891142	2.5443	Gastrectomy	0.157184
md:M00443 SenX3-RegX3 (phosphate starvation response) two-component regulatory system	0.0346582	0.0891142	2.62822	Control	-2.28518
md:M00251 Teichoic acid transport system	0.0350712	0.0891142	2.11703	Gastrectomy	0.0269503
md:M00696 Multidrug resistance, efflux pump AcrEF-TolC	0.0350964	0.0891142	2.4325	Gastrectomy	0.55891
md:M00122 Cobalamin biosynthesis, cobinamide => cobalamin	0.0356275	0.089683	2.73641	Control	-0.276464
md:M00740 Methylaspartate cycle	0.0359914	0.0898246	2.51237	Gastrectomy	0.746342
md:M00048 Inosine monophosphate biosynthesis, PRPP + glutamine => IMP	0.0367975	0.0908295	2.67652	Gastrectomy	2.79547
md:M00176 Assimilatory sulfate reduction, sulfate => H2S	0.0373253	0.0908295	2.22791	Gastrectomy	0.353094
md:M00051 Uridine monophosphate biosynthesis, glutamine (+ PRPP) => UMP	0.0373272	0.0908295	2.43486	Control	-0.173694
md:M00668 Tetracycline resistance, TetA transporter	0.0421018	0.101601	-	Gastrectomy	4.0066
md:M00727 Cationic antimicrobial peptide (CAMP) resistance, N-acetylmuramoyl-L-alanine amidase AmiA and AmiC	0.0441432	0.10484	-	Gastrectomy	0.400691
md:M00250 Lipopolysaccharide transport system	0.0441619	0.10484	-	Control	-0.631844
md:M00266 PTS system, maltose/glucose-specific II component	0.048316	0.113777	-	Gastrectomy	0.255088
md:M00331 Type II general secretion pathway	0.0490394	0.114491	-	Gastrectomy	0.557363
md:M00259 Heme transport system	0.0494038	0.114491	-	Gastrectomy	0.489362
md:M00550 Ascorbate degradation, ascorbate => D-xylulose-5P	0.051264	0.117867	-	Gastrectomy	0.470996
md:M00440 Nickel transport system	0.0535726	0.122212	-	Gastrectomy	0.346695
md:M00185 Sulfate transport system	0.0551593	0.124857	-	Gastrectomy	0.212312
md:M00746 Multidrug resistance, repression of porin OmpF	0.0580507	0.130391	-	Gastrectomy	0.551652
md:M00589 Putative lysine transport system	0.0592983	0.132176	-	Gastrectomy	0.0786142
md:M00214 Methyl-galactoside transport system	0.0636918	0.140894	-	Gastrectomy	0.112015
md:M00429 Competence-related DNA transformation transporter	0.064602	0.141833	-	Gastrectomy	0.267331
md:M00723 Cationic antimicrobial peptide (CAMP) resistance, ethanolaminephosphotransferase EptB	0.0729908	0.159054	-	Gastrectomy	0.607871
md:M00479 DesK-DesR (membrane lipid fluidity regulation) two-component regulatory system	0.0739171	0.15988	-	Gastrectomy	0.118606
md:M00273 PTS system, fructose-specific II component	0.0774414	0.166271	-	Gastrectomy	0.274271
md:M00272 PTS system, beta-glucoside (arbutin/salicin/cellobiose)-specific II component	0.0785096	0.167334	-	Gastrectomy	0.00354486
md:M00016 Lysine biosynthesis, succinyl-DAP pathway, aspartate => lysine	0.0817865	0.173055	-	Control	-0.222007
md:M00432 Leucine biosynthesis, 2-oxoisovalerate => 2-oxoisocaproate	0.084032	0.176528	-	Control	-0.147068
md:M00267 PTS system, N-acetylglucosamine-specific II component	0.0851734	0.177647	-	Control	-0.471106
md:M00506 CheA-CheYBV (chemotaxis) two-component regulatory system	0.0874937	0.181193	-	Gastrectomy	0.219523
md:M00452 CusS-CusR (copper tolerance) two-component regulatory system	0.0897786	0.184615	-	Gastrectomy	0.640678
md:M00359 Aminoacyl-tRNA biosynthesis, eukaryotes	0.0922872	0.188447	-	Control	-0.144402
md:M00651 Vancomycin resistance, D-Ala-D-Lac type	0.0960156	0.194698	-	Gastrectomy	0.0578525
md:M00245 Cobalt/nickel transport system	0.101181	0.203758	-	Gastrectomy	0.095445
md:M00199 L-Arabinose/lactose transport system	0.102489	0.204977	-	Gastrectomy	0.0842767
md:M00450 BaeS-BaeR (envelope stress response) two-component regulatory system	0.103976	0.205142	-	Gastrectomy	0.310353
md:M00645 Multidrug resistance, efflux pump SmeABC	0.103976	0.205142	-	Gastrectomy	0.310353
md:M00491 arabinogalactan oligomer/maltooligosaccharide transport system	0.105196	0.206157	-	Gastrectomy	0.139734
md:M00255 Lipoprotein-releasing system	0.106563	0.207442	-	Control	-0.443465
md:M00499 HydH-HydG (metal tolerance) two-component regulatory system	0.109814	0.211781	-	Gastrectomy	0.283556
md:M00134 Polyamine biosynthesis, arginine => ornithine => putrescine	0.110242	0.211781	-	Control	-0.359563
md:M00188 NitT/TauT family transport system	0.112168	0.214073	-	Gastrectomy	0.0834673
md:M00246 Nickel transport system	0.116523	0.220888	-	Gastrectomy	0.0951471
md:M00216 Multiple sugar transport system	0.117252	0.220888	-	Control	-1.11644
md:M00271 PTS system, beta-glucoside-specific II component	0.1272	0.238093	-	Control	-0.0329093
md:M00221 Putative simple sugar transport system	0.128786	0.239526	-	Gastrectomy	0.0759033
md:M00333 Type IV secretion system	0.132003	0.243956	-	Gastrectomy	0.180258
md:M00119 Pantothenate biosynthesis, valine/L-aspartate => pantothenate	0.133635	0.245418	-	Control	-0.238947
md:M00453 QseC-QseB (quorum sensing) two-component regulatory system	0.139639	0.254491	-	Gastrectomy	0.240743
md:M00207 Putative multiple sugar transport system	0.140319	0.254491	-	Control	-0.469769
md:M00093 Phosphatidylethanolamine (PE) biosynthesis, PA => PS => PE	0.142029	0.256003	-	Control	-0.251835	Age- (-0.0005570)
md:M00191 Thiamine transport system	0.154282	0.275003	-	Gastrectomy	0.435708	GastricAcidMed+ (0.01375)
md:M00190 Iron(III) transport system	0.154454	0.275003	-	Control	-0.267421
md:M00277 PTS system, N-acetylgalactosamine-specific II component	0.156294	0.276593	-	Control	-0.41604
md:M00298 Multidrug/hemolysin transport system	0.161915	0.284574	-	Gastrectomy	0.384718
md:M00500 AtoS-AtoC (cPHB biosynthesis) two-component regulatory system	0.162753	0.284574	-	Gastrectomy	0.405988
md:M00502 GlrK-GlrR (amino sugar metabolism) two-component regulatory system	0.169065	0.29385	-	Gastrectomy	0.385633
md:M00274 PTS system, mannitol-specific II component	0.177649	0.305138	-	Gastrectomy	0.323149
md:M00238 D-Methionine transport system	0.177649	0.305138	-	Control	-0.0462046
md:M00596 Dissimilatory sulfate reduction, sulfate => H2S	0.179692	0.306843	-	Control	-0.164852
md:M00009 Citrate cycle (TCA cycle, Krebs cycle)	0.183833	0.312088	-	Control	-0.185046
md:M00580 Pentose phosphate pathway, archaea, fructose 6P => ribose 5P	0.198483	0.335012	-	Control	-0.144912	Age+ (0.00074889)
md:M00722 Cationic antimicrobial peptide (CAMP) resistance, ethanolaminephosphotransferase EptA	0.204852	0.343775	-	Gastrectomy	0.402404
md:M00449 CreC-CreB (phosphate regulation) two-component regulatory system	0.213272	0.35586	-	Gastrectomy	0.483772
md:M00549 Nucleotide sugar biosynthesis, glucose => UDP-glucose	0.217161	0.360291	-	Control	-0.187608
md:M00060 KDO2-lipid A biosynthesis, Raetz pathway, LpxL-LpxM type	0.221914	0.366096	-	Control	-0.349629
md:M00581 Biotin transport system	0.224318	0.367983	-	Control	-0.343079
md:M00140 C1-unit interconversion, prokaryotes	0.226741	0.369879	-	Control	-0.154961
md:M00239 Peptides/nickel transport system	0.231642	0.375629	-	Control	-0.201373
md:M00365 C10-C20 isoprenoid biosynthesis, archaea	0.232838	0.375629	-	Gastrectomy	0.116374
md:M00345 Formaldehyde assimilation, ribulose monophosphate pathway	0.237356	0.380813	-	Gastrectomy	0.126568	BMI- (-0.0048703)
md:M00116 Menaquinone biosynthesis, chorismate => menaquinol	0.249388	0.397931	-	Control	-0.0311371
md:M00232 General L-amino acid transport system	0.25484	0.40442	-	Gastrectomy	0.559245
md:M00477 EvgS-EvgA (acid and drug tolerance) two-component regulatory system	0.275593	0.43358	-	Gastrectomy	1.22467
md:M00712 Multidrug resistance, efflux pump YkkCD	0.27813	0.43358	-	Control	-3.5858	BMI+ (0.00192309)
md:M00472 NarQ-NarP (nitrate respiration) two-component regulatory system	0.278713	0.43358	-	Gastrectomy	0.431533
md:M00208 Glycine betaine/proline transport system	0.279154	0.43358	-	Control	-0.355542
md:M00729 Fluoroquinolone resistance, gyrase-protecting protein Qnr	0.287676	0.442359	-	Control	-0.0191505
md:M00173 Reductive citrate cycle (Arnon-Buchanan cycle)	0.290555	0.442359	-	Control	-0.183023
md:M00606 N,N'-Diacetylchitobiose transport system	0.290555	0.442359	-	Control	-0.235673
md:M00455 TorS-TorR (TMAO respiration) two-component regulatory system	0.291991	0.442359	-	Gastrectomy	0.0545139
md:M00206 Cellobiose transport system	0.293453	0.442359	-	Control	-0.229904
md:M00435 Taurine transport system	0.293896	0.442359	-	Gastrectomy	0.24583
md:M00632 Galactose degradation, Leloir pathway, galactose => alpha-D-glucose-1P	0.296371	0.443796	-	Control	-0.17184
md:M00488 DcuS-DcuR (C4-dicarboxylate metabolism) two-component regulatory system	0.299875	0.446752	-	Gastrectomy	0.12914
md:M00764 PTS system, fructoselysine/glucoselysine-specific II component	0.305239	0.451146	-	Control	-0.54271
md:M00344 Formaldehyde assimilation, xylulose monophosphate pathway	0.306793	0.451146	-	Gastrectomy	0.427701
md:M00707 Multidrug resistance, MdlAB/SmdAB transporter	0.307572	0.451146	-	Gastrectomy	0.489691
md:M00217 D-Allose transport system	0.309004	0.451146	-	Gastrectomy	1.0117
md:M00050 Guanine ribonucleotide biosynthesis IMP => GDP,GTP	0.320409	0.463165	-	Control	-0.154847
md:M00360 Aminoacyl-tRNA biosynthesis, prokaryotes	0.320409	0.463165	-	Control	-0.146249
md:M00183 RNA polymerase, bacteria	0.323501	0.464981	-	Gastrectomy	0.0536361
md:M00451 BasS-BasR (antimicrobial peptide resistance) two-component regulatory system	0.324849	0.464981	-	Gastrectomy	0.436102
md:M00268 PTS system, alpha-glucoside-specific II component	0.329743	0.467403	-	Gastrectomy	0.190322
md:M00303 PTS system, N-acetylmuramic acid-specific II component	0.329743	0.467403	-	Control	-0.0511675
md:M00017 Methionine biosynthesis, apartate => homoserine => methionine	0.34246	0.480761	-	Control	-0.164834
md:M00258 Putative ABC transport system	0.34246	0.480761	-	Control	-0.134986
md:M00582 Energy-coupling factor transport system	0.345687	0.48297	-	Gastrectomy	0.0639319
md:M00189 Molybdate transport system	0.348934	0.485185	-	Control	-0.210652
md:M00179 Ribosome, archaea	0.3522	0.487405	-	Control	-0.0830098
md:M00200 Putative sorbitol/mannitol transport system	0.355486	0.489631	-	Control	-0.179894
md:M00034 Methionine salvage pathway	0.372201	0.510248	-	Gastrectomy	0.123068
md:M00240 Iron complex transport system	0.396407	0.538376	-	Control	-0.0335298
md:M00124 Pyridoxal biosynthesis, erythrose-4P => pyridoxal-5P	0.396407	0.538376	-	Control	-0.373519
md:M00061 D-Glucuronate degradation, D-glucuronate => pyruvate + D-glyceraldehyde 3P	0.399936	0.540654	-	Gastrectomy	0.017657
md:M00605 Glucose/mannose transport system	0.410655	0.550176	-	Control	-0.149662
md:M00346 Formaldehyde assimilation, serine pathway	0.410748	0.550176	-	Gastrectomy	0.109345
md:M00320 Lipopolysaccharide export system	0.414264	0.552353	-	Control	-0.313371
md:M00554 Nucleotide sugar biosynthesis, galactose => UDP-galactose	0.425204	0.564122	-	Control	-0.203098
md:M00377 Reductive acetyl-CoA pathway (Wood-Ljungdahl pathway)	0.428887	0.564122	-	Control	-0.168247	Age- (-0.0005009)
md:M00260 DNA polymerase III complex, bacteria	0.428887	0.564122	-	Control	-0.102722
md:M00486 CitA-CitB (citrate fermentation) two-component regulatory system	0.443054	0.580142	-	Gastrectomy	0.386207
md:M00652 Vancomycin resistance, D-Ala-D-Ser type	0.447535	0.582769	-	Control	-0.391972
md:M00003 Gluconeogenesis, oxaloacetate => fructose-6P	0.449051	0.582769	-	Gastrectomy	0.299774
md:M00045 Histidine degradation, histidine => N-formiminoglutamate => glutamate	0.451375	0.583193	-	Control	-0.33652
md:M00361 Nucleotide sugar biosynthesis, eukaryotes	0.455051	0.585351	-	Control	-0.0588142
md:M00269 PTS system, sucrose-specific II component	0.462865	0.587637	-	Control	-0.0839823
md:M00211 Putative ABC transport system	0.462865	0.587637	-	Control	-0.426917
md:M00577 Biotin biosynthesis, BioW pathway, pimelate => pimeloyl-CoA => biotin	0.462865	0.587637	-	Control	-0.187373
md:M00276 PTS system, mannose-specific II component	0.470614	0.589782	-	Control	-0.261121
md:M00159 V/A-type ATPase, prokaryotes	0.470614	0.589782	-	Control	-0.173547
md:M00193 Putative spermidine/putrescine transport system	0.470614	0.589782	-	Control	-0.0752052
md:M00374 Dicarboxylate-hydroxybutyrate cycle	0.48237	0.601932	-	Control	-0.00256326
md:M00573 Biotin biosynthesis, BioI pathway, long-chain-acyl-ACP => pimeloyl-ACP => biotin	0.498292	0.619155	-	Control	-0.199396	BMI+ (0.0020986)
md:M00747 Bacitracin transport system	0.506357	0.623866	-	Control	-0.143267
md:M00178 Ribosome, bacteria	0.506357	0.623866	-	Control	-0.0758217
md:M00149 Succinate dehydrogenase, prokaryotes	0.535113	0.654817	-	Gastrectomy	0.103647
md:M00357 Methanogenesis, acetate => methane	0.54039	0.654817	-	Gastrectomy	0.548423
md:M00439 Oligopeptide transport system	0.543478	0.654817	-	Control	-0.0574988
md:M00244 Putative zinc/manganese transport system	0.551903	0.654817	-	Control	-0.834722
md:M00602 Arabinosaccharide transport system	0.556146	0.654817	-	Control	-0.133896
md:M00325 alpha-Hemolysin/cyclolysin transport system	0.556146	0.654817	-	Control	-0.169326
md:M00720 Multidrug resistance, efflux pump VexEF-TolC	0.556146	0.654817	-	Control	-0.172348
md:M00326 RTX toxin transport system	0.556146	0.654817	-	Control	-0.172348
md:M00821 Multidrug resistance, efflux pump TriABC-TolC	0.556146	0.654817	-	Control	-0.172348
md:M00571 AlgE-type Mannuronan C-5-Epimerase transport system	0.556146	0.654817	-	Control	-0.172348
md:M00011 Citrate cycle, second carbon oxidation, 2-oxoglutarate => oxaloacetate	0.556146	0.654817	-	Control	-0.123817
md:M00205 N-Acetylglucosamine transport system	0.577564	0.677304	-	Control	-0.313324
md:M00627 beta-Lactam resistance, Bla system	0.581905	0.679665	-	Control	-0.214707
md:M00308 Semi-phosphorylative Entner-Doudoroff pathway, gluconate => glycerate-3P	0.586252	0.682015	-	Gastrectomy	0.00652912
md:M00603 Putative aldouronate transport system	0.599383	0.694523	-	Control	-0.302953
md:M00279 PTS system, galactitol-specific II component	0.60821	0.699202	-	Gastrectomy	0.061396
md:M00280 PTS system, glucitol/sorbitol-specific II component	0.60821	0.699202	-	Control	-0.437435
md:M00153 Cytochrome bd ubiquinol oxidase	0.621557	0.708737	-	Control	-0.262113
md:M00136 GABA biosynthesis, prokaryotes, putrescine => GABA	0.623702	0.708737	-	Control	-0.0177044
md:M00175 Nitrogen fixation, nitrogen => ammonia	0.623785	0.708737	-	Control	-0.169092
md:M00254 ABC-2 type transport system	0.630526	0.713618	-	Control	-0.00469127
md:M00022 Shikimate pathway, phosphoenolpyruvate + erythrose-4P => chorismate	0.635031	0.715942	-	Control	-0.101863
md:M00306 PTS system, fructose-specific II-like component	0.641784	0.720581	-	Gastrectomy	0.481757
md:M00247 Putative ABC transport system	0.644081	0.720581	-	Control	-0.0040368
md:M00197 Putative fructooligosaccharide transport system	0.648626	0.722461	-	Gastrectomy	0.0581072
md:M00236 Putative polar amino acid transport system	0.653184	0.722461	-	Control	-0.0115888
md:M00237 Branched-chain amino acid transport system	0.653184	0.722461	-	Control	-0.112096
md:M00123 Biotin biosynthesis, pimeloyl-ACP/CoA => biotin	0.690105	0.760417	-	Control	-0.00519006
md:M00133 Polyamine biosynthesis, arginine => agmatine => putrescine => spermidine	0.727778	0.798914	-	Control	-0.169168
md:M00519 YesM-YesN two-component regulatory system	0.766121	0.837855	-	Control	-0.0936526
md:M00697 Multidrug resistance, efflux pump MdtEF-TolC	0.773081	0.842312	-	Gastrectomy	0.539035	Total cholesterol - (-0.00028)
md:M00806 PTS system, maltose-specific II component	0.780655	0.844263	-	Control	-0.337632
md:M00115 NAD biosynthesis, aspartate => NAD	0.780655	0.844263	-	Control	-0.0216899
md:M00242 Zinc transport system	0.785516	0.846387	-	Gastrectomy	0.0245535
md:M00144 NADH:quinone oxidoreductase, prokaryotes	0.805046	0.857932	-	Control	-0.153152
md:M00670 Mce transport system	0.805046	0.857932	-	Control	-0.135253
md:M00669 gamma-Hexachlorocyclohexane transport system	0.805046	0.857932	-	Control	-0.135253
md:M00080 Lipopolysaccharide biosynthesis, inner core => outer core => O-antigen	0.815215	0.86561	-	Control	-0.436843
md:M00234 L-Cystine transport system	0.829628	0.877723	-	Control	-0.138259	Age+ (0.000445538)
md:M00029 Urea cycle	0.854319	0.896176	-	Gastrectomy	0.046674
md:M00339 RaxAB-RaxC type I secretion system	0.854379	0.896176	-	Control	-0.0647993
md:M00202 Oligogalacturonide transport system	0.859343	0.896176	-	Control	-0.254375		Control+ (1.13618105e-05)
md:M00631 D-Galacturonate degradation (bacteria), D-galacturonate => pyruvate + D-glyceraldehyde 3P	0.859347	0.896176	-	Control	-0.0503762
md:M00125 Riboflavin biosynthesis, GTP => riboflavin/FMN/FAD	0.874284	0.907236	-	Gastrectomy	0.00565532
md:M00299 Spermidine/putrescine transport system	0.879273	0.907236	-	Control	-0.0122858
md:M00287 PTS system, galactosamine-specific II component	0.879273	0.907236	-	Control	-0.117063
md:M00282 PTS system, D-glucosamine-specific II component	0.904287	0.92976	-	Control	-0.225636
md:M00020 Serine biosynthesis, glycerate-3P => serine	0.924369	0.947073	-	Control	-0.0509076
md:M00362 Nucleotide sugar biosynthesis, prokaryotes	0.929398	0.948895	-	Control	-0.143128
md:M00278 PTS system, sorbose-specific II component	0.944385	0.960837	-	Gastrectomy	0.563142
md:M00005 PRPP biosynthesis, ribose 5P => PRPP	0.949537	0.962725	-	Control	-0.106182
md:M00210 Phospholipid transport system	0.964664	0.974678	-	Control	-0.0915146
md:M00033 Ectoine biosynthesis, aspartate => ectoine	0.97387	0.980586	-	Control	-0.00241972
md:M00552 D-galactonate degradation, De Ley-Doudoroff pathway, D-galactonate => glycerate-3P	0.979804	0.983171	-	Control	-0.277767
md:M00046 Pyrimidine degradation, uracil => beta-alanine, thymine => 3-aminoisobutanoate	0.99495	0.99495	-	Gastrectomy	0.145051
Notes
FC: Fold Change
FDR: P corrected value by Benjamini-Hochberg (BH) False Discovery Rate (FDR) analysis
LDA: Linear Discriminant Analysis
LEfSe: LDA effect size
Significantly different features
Features that were confirmed significant in two annotations methods
*Demographic information associated with the features and its association coefficient
**The demographic information were taken into account in calculating the features association with the patients group by MaAsLin (Control and Gastrectomy)
**The association coefficien will be displayed if the MaAsLin results conssisten to the LEfSe result
**The coefficient were adjusted by possible confounder (BMI, total cholesterol, diabetes medications, and gastric acids medications, gender, age)
+positive association; -negative association
