# Supplementary material
Source: HighWire-hosted journal article supplement (https://gut.bmj.com/content/69/8/1404)
Supplement: inline-supplementary-material-21 [file inline-supplementary-material-21.xls]

## Sheet: Metabolome_profile
Supplementary Table S13. Species alpha-diversity and richness of KEGG modules contributor
*Overlap between in-house and HUMAnN2 pipeline
Module	P value (Shannon-diversity)	P value (Chao1)
md:M00196 Raffinose/stachyose/melibiose transport system	0.000111674	0.000530937
md:M00535 Isoleucine biosynthesis, pyruvate => 2-oxobutanoate	0.000221763	3.16552e-05
md:M00122 Cobalamin biosynthesis, cobinamide => cobalamin	0.000610217	7.14392e-06
md:M00743 Aminoglycoside resistance, protease HtpX	0.00599462	0.0534264
md:M00120 Coenzyme A biosynthesis, pantothenate => CoA	0.0337283	0.0088183
md:M00317 Manganese/iron transport system	0.0388205	0.00725146
md:M00447 CpxA-CpxR (envelope stress response) two-component regulatory system	0.0658114	0.00567943
md:M00223 Phosphonate transport system	0.0844288	0.00122299
md:M00229 Arginine transport system	0.119773	0.0404396
md:M00459 VicK-VicR (cell wall metabolism) two-component regulatory system	0.130649	0.000112559
md:M00226 Histidine transport system	0.231974	0.0303685
md:M00349 Microcin C transport system	0.234841	0.000129349
md:M00300 Putrescine transport system	0.264009	0.0127655
md:M00497 GlnL-GlnG (nitrogen regulation) two-component regulatory system	0.272069	0.00755135
md:M00744 Cationic antimicrobial peptide (CAMP) resistance, protease PgtE	0.314546	0.0741377
md:M00225 Lysine/arginine/ornithine transport system	0.340922	0.0412008
md:M00456 ArcB-ArcA (anoxic redox control) two-component regulatory system	0.357282	0.0202569
md:M00475 BarA-UvrY (central carbon metabolism) two-component regulatory system	0.401613	0.0033254
md:M00445 EnvZ-OmpR (osmotic stress response) two-component regulatory system	0.408523	0.00242321
md:M00117 Ubiquinone biosynthesis, prokaryotes, chorismate => ubiquinone	0.419817	0.00471371
md:M00701 Multidrug resistance, efflux pump EmrAB	0.536972	0.300601
md:M00233 Glutamate transport system	0.591141	0.417878
md:M00728 Cationic antimicrobial peptide (CAMP) resistance, envelope protein folding and degrading factors DegP and DsbA	0.746754	0.0143986
md:M00461 MtrB-MtrA (osmotic stress response) two-component regulatory system	0.764505	0.960962
md:M00194 Maltose/maltodextrin transport system	0.790763	0.0157577
md:M00495 AgrC-AgrA (exoprotein synthesis) two-component regulatory system	0.841962	0.0032695
md:M00724 Cationic antimicrobial peptide (CAMP) resistance, palmitoyl transferase PagP	0.892895	0.0202178
md:M00444 PhoQ-PhoP (magnesium transport) two-component regulatory system	0.966117	0.0168781
md:M00443 SenX3-RegX3 (phosphate starvation response) two-component regulatory system	0.974694	0.517647
reported in the main figure (Figure 4B)
