# Supplementary material
Source: HighWire-hosted journal article supplement (https://gut.bmj.com/content/69/8/1404)
Supplement: inline-supplementary-material-27 [file inline-supplementary-material-27.xls]

## Sheet: MIMOSA
Supplementary Table S15. MIMOSA output showing the species predicted to contribute to each metabolite
Species	compound	Correlation	PValPos	QValPos	PValNeg	QValNeg	Metabolite	Consistent	Contrasting	PredictionType	PredictionType2	PrimaryMake	nKOReac	nKOProd	nkeyKOReac	nkeyKOProd	PrimaryMake2	SuperPath	SubPath	CompoundName	MetDiff	MetPVal	Enriched	Depleted	Status	Taxonomy	Genus	SpeciesCor	Pass	GenusShort	KO	GeneCor	Reac	Prod	stoichReac	stoichProd	Reversible	Contrib
g__Adlercreutzia.s__Adlercreutzia_equolifaciens	C00581	0.169709	5e-05	0.000352614	1	1	Guanidinoacetate	1	0	Consistent	Consistent	1	0	1	0	1	Synthesis	NA	NA	Guanidinoacetate	-93.148	0.0137879	0	1	Depleted	g__Adlercreutzia.s__Adlercreutzia_equolifaciens	g__Adlercreutzia	0.576249	1	g__Adlercreutzia	K00613	NA	C00037	C00581	1	1	0	1
g__Akkermansia.s__Akkermansia_muciniphila	C00183	0.167195	5e-05	0.000352614	1	1	L-Valine	1	0	Consistent	Consistent	-1	1	0	1	0	Degradation	Amino acid	Valine, leucine and isoleucine metabolism	L-Valine	4966.92	0.0137748	1	0	Enriched	g__Akkermansia.s__Akkermansia_muciniphila	g__Akkermansia	0.65129	1	g__Akkermansia	K01873	NA	C00183	C02554	1	1	0	1
g__Akkermansia.s__Akkermansia_muciniphila	C00588	0.152059	5e-05	0.000352614	1	1	Choline phosphate	1	0	Consistent	Consistent	-1	1	0	1	0	Degradation	NA	NA	Choline phosphate	-26.9512	0.00119643	0	1	Depleted	g__Akkermansia.s__Akkermansia_muciniphila	g__Akkermansia	0.999293	1	g__Akkermansia	K00968	NA	C00588	C00307	1	1	0	1
g__Bacteroides.s__Bacteroides_fragilis	C00041	0.219131	5e-05	0.000352614	1	1	L-Alanine	1	0	Consistent	Consistent	0	1	2	1	2	Combination	Amino acid	Alanine and aspartate metabolism	L-Alanine	15466.7	0.000788685	1	0	Enriched	g__Bacteroides.s__Bacteroides_fragilis	g__Bacteroides	0.610545	1	g__Bacteroides	K09758	0.99456	C00049	C00041	1	1	0	2
g__Bacteroides.s__Bacteroides_fragilis	C00041	0.219131	5e-05	0.000352614	1	1	L-Alanine	1	0	Consistent	Consistent	0	1	2	1	2	Combination	Amino acid	Alanine and aspartate metabolism	L-Alanine	15466.7	0.000788685	1	0	Enriched	g__Bacteroides.s__Bacteroides_fragilis	g__Bacteroides	0.610545	1	g__Bacteroides	K09758	0.99456	C00606	C00041	1	1	0	2
g__Bacteroides.s__Bacteroides_fragilis	C00041	0.219131	5e-05	0.000352614	1	1	L-Alanine	1	0	Consistent	Consistent	0	1	2	1	2	Combination	Amino acid	Alanine and aspartate metabolism	L-Alanine	15466.7	0.000788685	1	0	Enriched	g__Bacteroides.s__Bacteroides_fragilis	g__Bacteroides	0.610545	1	g__Bacteroides	K11717	0.795035	C05688	C00041	1	1	0	2
g__Bacteroides.s__Bacteroides_fragilis	C02714	0.175036	5e-05	0.000352614	1	1	N-Acetylputrescine	1	0	Consistent	Consistent	1	1	1	0	1	Synthesis	Amino acid	Polyamine metabolism	N-Acetylputrescine	-1.70588	0.235863	0	0	None	g__Bacteroides.s__Bacteroides_fragilis	g__Bacteroides	0.554735	1	g__Bacteroides	K00657	-0.0129583	C00134	C02714	1	1	0	1
g__Bacteroides.s__Bacteroides_vulgatus	C00864	0.149532	5e-05	0.000352614	1	1	Pantothenate	1	0	Consistent	Consistent	-1	3	0	3	0	Degradation	Cofactors and vitamins	Pantothenate and CoA metabolism	Pantothenate	157.451	1.63e-05	1	0	Enriched	g__Bacteroides.s__Bacteroides_vulgatus	g__Bacteroides	0.541609	1	g__Bacteroides	K03525	0.744371	C00864	C03492	1	1	0	2
g__Bacteroides.s__Bacteroides_vulgatus	C00864	0.149532	5e-05	0.000352614	1	1	Pantothenate	1	0	Consistent	Consistent	-1	3	0	3	0	Degradation	Cofactors and vitamins	Pantothenate and CoA metabolism	Pantothenate	157.451	1.63e-05	1	0	Enriched	g__Bacteroides.s__Bacteroides_vulgatus	g__Bacteroides	0.541609	1	g__Bacteroides	K09680	0.9043	C00864	C03492	1	1	0	2
g__Bifidobacterium.s__Bifidobacterium_dentium	C00122	0.117103	0.00019999	0.000992543	0.9999	1	Fumarate	1	0	Consistent	Consistent	1	0	2	0	2	Synthesis	Energy	Krebs cycle	Fumarate	70.2421	0.0417473	1	0	Enriched	g__Bifidobacterium.s__Bifidobacterium_dentium	g__Bifidobacterium	0.52491	1	g__Bifidobacterium	K01744	0.805548	C00049	C00122	1	1	0	2
g__Bifidobacterium.s__Bifidobacterium_dentium	C00122	0.117103	0.00019999	0.000992543	0.9999	1	Fumarate	1	0	Consistent	Consistent	1	0	2	0	2	Synthesis	Energy	Krebs cycle	Fumarate	70.2421	0.0417473	1	0	Enriched	g__Bifidobacterium.s__Bifidobacterium_dentium	g__Bifidobacterium	0.52491	1	g__Bifidobacterium	K01756	0.548901	C03794	C00122	1	1	0	2
g__Campylobacter.s__Campylobacter_gracilis	C00122	0.117103	0.00019999	0.000992543	0.9999	1	Fumarate	1	0	Consistent	Consistent	1	0	2	0	2	Synthesis	Energy	Krebs cycle	Fumarate	70.2421	0.0417473	1	0	Enriched	g__Campylobacter.s__Campylobacter_gracilis	g__Campylobacter	0.531169	1	g__Campylobacter	K01744	0.805548	C00049	C00122	1	1	0	2
g__Eggerthella.s__Eggerthella_lenta	C00581	0.169709	5e-05	0.000352614	1	1	Guanidinoacetate	1	0	Consistent	Consistent	1	0	1	0	1	Synthesis	NA	NA	Guanidinoacetate	-93.148	0.0137879	0	1	Depleted	g__Eggerthella.s__Eggerthella_lenta	g__Eggerthella	0.580953	1	g__Eggerthella	K00613	NA	C00037	C00581	1	1	0	1
g__Escherichia.s__Escherichia_coli	C00019	0.102426	0.00174991	0.00689671	0.99805	1	S-Adenosyl-L-methionine	1	0	Consistent	Consistent	-1	6	0	6	0	Degradation	NA	NA	S-Adenosyl-L-methionine	-30.0359	1.28e-09	0	1	Depleted	g__Escherichia.s__Escherichia_coli	g__Escherichia	0.659761	1	g__Escherichia	K00558	0.555901	C00019	C00021	1	1	0	2
g__Escherichia.s__Escherichia_coli	C00019	0.102426	0.00174991	0.00689671	0.99805	1	S-Adenosyl-L-methionine	1	0	Consistent	Consistent	-1	6	0	6	0	Degradation	NA	NA	S-Adenosyl-L-methionine	-30.0359	1.28e-09	0	1	Depleted	g__Escherichia.s__Escherichia_coli	g__Escherichia	0.659761	1	g__Escherichia	K00568	0.929856	C00019	C00021	1	1	0	2
g__Escherichia.s__Escherichia_coli	C00019	0.102426	0.00174991	0.00689671	0.99805	1	S-Adenosyl-L-methionine	1	0	Consistent	Consistent	-1	6	0	6	0	Degradation	NA	NA	S-Adenosyl-L-methionine	-30.0359	1.28e-09	0	1	Depleted	g__Escherichia.s__Escherichia_coli	g__Escherichia	0.659761	1	g__Escherichia	K00568	0.929856	C00019	C00399	1	1	0	2
g__Escherichia.s__Escherichia_coli	C00019	0.102426	0.00174991	0.00689671	0.99805	1	S-Adenosyl-L-methionine	1	0	Consistent	Consistent	-1	6	0	6	0	Degradation	NA	NA	S-Adenosyl-L-methionine	-30.0359	1.28e-09	0	1	Depleted	g__Escherichia.s__Escherichia_coli	g__Escherichia	0.659761	1	g__Escherichia	K01611	0.962873	C00019	C01137	1	1	0	2
g__Escherichia.s__Escherichia_coli	C00042	0.262156	5e-05	0.000352614	1	1	Succinate	1	0	Consistent	Consistent	1	0	3	0	3	Synthesis	Energy	Krebs cycle	Succinate	10772.8	0.0349812	1	0	Enriched	g__Escherichia.s__Escherichia_coli	g__Escherichia	0.704565	1	g__Escherichia	K01637	0.97268	C00311	C00042	1	1	0	2
g__Escherichia.s__Escherichia_coli	C00042	0.262156	5e-05	0.000352614	1	1	Succinate	1	0	Consistent	Consistent	1	0	3	0	3	Synthesis	Energy	Krebs cycle	Succinate	10772.8	0.0349812	1	0	Enriched	g__Escherichia.s__Escherichia_coli	g__Escherichia	0.704565	1	g__Escherichia	K01739	0.719525	C00283	C00042	1	1	0	2
g__Escherichia.s__Escherichia_coli	C00073	0.32442	5e-05	0.000352614	1	1	L-Methionine	1	0	Consistent	Consistent	0	2	2	2	2	Combination	Amino acid	Cysteine, methionine, SAM, taurine metabolism	L-Methionine	1534.36	0.00147539	1	0	Enriched	g__Escherichia.s__Escherichia_coli	g__Escherichia	0.553162	1	g__Escherichia	K00832	0.842349	C01180	C00073	1	1	0	2
g__Escherichia.s__Escherichia_coli	C00114	0.139598	0.000149993	0.000837458	0.9999	1	Choline	1	0	Consistent	Consistent	1	3	2	0	1	Synthesis	NA	NA	Choline	437.56	0.39775	0	0	None	g__Escherichia.s__Escherichia_coli	g__Escherichia	0.538397	1	g__Escherichia	K00108	0.988321	C00114	C00576	1	1	0	0
g__Escherichia.s__Escherichia_coli	C00114	0.139598	0.000149993	0.000837458	0.9999	1	Choline	1	0	Consistent	Consistent	1	3	2	0	1	Synthesis	NA	NA	Choline	437.56	0.39775	0	0	None	g__Escherichia.s__Escherichia_coli	g__Escherichia	0.538397	1	g__Escherichia	K01126	-0.16978	C00670	C00114	1	1	0	1
g__Escherichia.s__Escherichia_coli	C00178	0.161526	5e-05	0.000352614	1	1	Thymine	1	0	Consistent	Consistent	1	0	3	0	3	Synthesis	Nucleotide	Pyrimidine metabolism, thymine containing	Thymine	561.469	0.0207566	1	0	Enriched	g__Escherichia.s__Escherichia_coli	g__Escherichia	0.607292	1	g__Escherichia	K00758	0.978703	C00214	C00178	1	1	0	2
g__Escherichia.s__Escherichia_coli	C00178	0.161526	5e-05	0.000352614	1	1	Thymine	1	0	Consistent	Consistent	1	0	3	0	3	Synthesis	Nucleotide	Pyrimidine metabolism, thymine containing	Thymine	561.469	0.0207566	1	0	Enriched	g__Escherichia.s__Escherichia_coli	g__Escherichia	0.607292	1	g__Escherichia	K01485	0.927401	C02376	C00178	1	1	0	2
g__Escherichia.s__Escherichia_coli	C00327	0.226848	5e-05	0.000352614	1	1	L-Citrulline	1	0	Consistent	Consistent	1	0	2	0	1	Synthesis	Amino acid	Urea cycle; arginine-, proline-, metabolism	L-Citrulline	2585.48	1.21e-05	1	0	Enriched	g__Escherichia.s__Escherichia_coli	g__Escherichia	0.532079	1	g__Escherichia	K00611	0.449886	C00169	C00327	1	1	0	1
g__Escherichia.s__Escherichia_coli	C00327	0.226848	5e-05	0.000352614	1	1	L-Citrulline	1	0	Consistent	Consistent	1	0	2	0	1	Synthesis	Amino acid	Urea cycle; arginine-, proline-, metabolism	L-Citrulline	2585.48	1.21e-05	1	0	Enriched	g__Escherichia.s__Escherichia_coli	g__Escherichia	0.532079	1	g__Escherichia	K01438	0.969018	C15532	C00327	1	1	0	0
g__Escherichia.s__Escherichia_coli	C00334	0.202706	5e-05	0.000352614	1	1	4-Aminobutanoate	1	0	Consistent	Consistent	1	1	3	0	1	Synthesis	Amino acid	Glutamate metabolism	4-Aminobutanoate	-37.5678	0.187396	0	0	None	g__Escherichia.s__Escherichia_coli	g__Escherichia	0.778715	1	g__Escherichia	K00137	0.893909	C00555	C00334	1	1	0	0
g__Escherichia.s__Escherichia_coli	C00334	0.202706	5e-05	0.000352614	1	1	4-Aminobutanoate	1	0	Consistent	Consistent	1	1	3	0	1	Synthesis	Amino acid	Glutamate metabolism	4-Aminobutanoate	-37.5678	0.187396	0	0	None	g__Escherichia.s__Escherichia_coli	g__Escherichia	0.778715	1	g__Escherichia	K09473	0.953188	C15767	C00334	1	1	0	0
g__Escherichia.s__Escherichia_coli	C00385	0.114197	0.00019999	0.000992543	0.99955	1	Xanthine	1	0	Consistent	Consistent	1	0	8	0	8	Synthesis	Nucleotide	Purine metabolism, (hypo)xanthine/inosine containing	Xanthine	2558.04	3.84e-08	1	0	Enriched	g__Escherichia.s__Escherichia_coli	g__Escherichia	0.823821	1	g__Escherichia	K00087	0.99745	C00262	C00385	1	1	0	2
g__Escherichia.s__Escherichia_coli	C00385	0.114197	0.00019999	0.000992543	0.99955	1	Xanthine	1	0	Consistent	Consistent	1	0	8	0	8	Synthesis	Nucleotide	Purine metabolism, (hypo)xanthine/inosine containing	Xanthine	2558.04	3.84e-08	1	0	Enriched	g__Escherichia.s__Escherichia_coli	g__Escherichia	0.823821	1	g__Escherichia	K01487	0.905222	C00242	C00385	1	1	0	2
g__Escherichia.s__Escherichia_coli	C00385	0.114197	0.00019999	0.000992543	0.99955	1	Xanthine	1	0	Consistent	Consistent	1	0	8	0	8	Synthesis	Nucleotide	Purine metabolism, (hypo)xanthine/inosine containing	Xanthine	2558.04	3.84e-08	1	0	Enriched	g__Escherichia.s__Escherichia_coli	g__Escherichia	0.823821	1	g__Escherichia	K13479	0.985404	C00262	C00385	1	1	0	2
g__Escherichia.s__Escherichia_coli	C00385	0.114197	0.00019999	0.000992543	0.99955	1	Xanthine	1	0	Consistent	Consistent	1	0	8	0	8	Synthesis	Nucleotide	Purine metabolism, (hypo)xanthine/inosine containing	Xanthine	2558.04	3.84e-08	1	0	Enriched	g__Escherichia.s__Escherichia_coli	g__Escherichia	0.823821	1	g__Escherichia	K13480	0.984685	C00262	C00385	1	1	0	2
g__Escherichia.s__Escherichia_coli	C00385	0.114197	0.00019999	0.000992543	0.99955	1	Xanthine	1	0	Consistent	Consistent	1	0	8	0	8	Synthesis	Nucleotide	Purine metabolism, (hypo)xanthine/inosine containing	Xanthine	2558.04	3.84e-08	1	0	Enriched	g__Escherichia.s__Escherichia_coli	g__Escherichia	0.823821	1	g__Escherichia	K13483	0.998386	C00262	C00385	1	1	0	2
g__Escherichia.s__Escherichia_coli	C00576	0.153109	5e-05	0.000352614	1	1	Betaine aldehyde	1	0	Consistent	Consistent	-1	1	3	1	0	Degradation	NA	NA	Betaine aldehyde	-121.225	0.838754	0	0	None	g__Escherichia.s__Escherichia_coli	g__Escherichia	0.567875	1	g__Escherichia	K00108	0.987427	C00114	C00576	1	1	0	0
g__Escherichia.s__Escherichia_coli	C00576	0.153109	5e-05	0.000352614	1	1	Betaine aldehyde	1	0	Consistent	Consistent	-1	1	3	1	0	Degradation	NA	NA	Betaine aldehyde	-121.225	0.838754	0	0	None	g__Escherichia.s__Escherichia_coli	g__Escherichia	0.567875	1	g__Escherichia	K00130	-0.725792	C00576	C00719	1	1	0	1
g__Escherichia.s__Escherichia_coli	C00719	0.122171	0.000249988	0.00119637	0.99985	1	Betaine	1	0	Consistent	Consistent	1	0	1	0	1	Synthesis	NA	NA	Betaine	-51.5735	0.0584724	0	1	Depleted	g__Escherichia.s__Escherichia_coli	g__Escherichia	0.839383	1	g__Escherichia	K00130	NA	C00576	C00719	1	1	0	1
g__Escherichia.s__Escherichia_coli	C00979	0.125102	0.000299985	0.00133993	0.99965	1	O-Acetyl-L-serine	1	0	Consistent	Consistent	-1	1	0	1	0	Degradation	NA	NA	O-Acetyl-L-serine	-3.19451	0.2308	0	0	None	g__Escherichia.s__Escherichia_coli	g__Escherichia	0.90375	1	g__Escherichia	K12339	NA	C00979	C05824	1	1	0	1
g__Escherichia.s__Escherichia_coli	C02713	0.172214	5e-05	0.000352614	1	1	N-Acetylmuramate	1	0	Consistent	Consistent	-1	4	0	4	0	Degradation	Carbohydrate	Fructose mannose galactose starch and sucrose metabolism	N-Acetylmuramate	242.966	0.00219766	1	0	Enriched	g__Escherichia.s__Escherichia_coli	g__Escherichia	0.881869	1	g__Escherichia	K02777	0.516745	C02713	C16698	1	1	0	2
g__Escherichia.s__Escherichia_coli	C02713	0.172214	5e-05	0.000352614	1	1	N-Acetylmuramate	1	0	Consistent	Consistent	-1	4	0	4	0	Degradation	Carbohydrate	Fructose mannose galactose starch and sucrose metabolism	N-Acetylmuramate	242.966	0.00219766	1	0	Enriched	g__Escherichia.s__Escherichia_coli	g__Escherichia	0.881869	1	g__Escherichia	K11191	0.98615	C02713	C16698	1	1	0	2
g__Escherichia.s__Escherichia_coli	C02713	0.172214	5e-05	0.000352614	1	1	N-Acetylmuramate	1	0	Consistent	Consistent	-1	4	0	4	0	Degradation	Carbohydrate	Fructose mannose galactose starch and sucrose metabolism	N-Acetylmuramate	242.966	0.00219766	1	0	Enriched	g__Escherichia.s__Escherichia_coli	g__Escherichia	0.881869	1	g__Escherichia	K11192	0.98615	C02713	C16698	1	1	0	2
g__Escherichia.s__Escherichia_coli	C02714	0.175036	5e-05	0.000352614	1	1	N-Acetylputrescine	1	0	Consistent	Consistent	1	1	1	0	1	Synthesis	Amino acid	Polyamine metabolism	N-Acetylputrescine	-1.70588	0.235863	0	0	None	g__Escherichia.s__Escherichia_coli	g__Escherichia	0.715785	1	g__Escherichia	K00657	-0.0129583	C00134	C02714	1	1	0	1
g__Eubacterium.s__Eubacterium_rectale	C00329	0.108616	0.000149993	0.000837458	0.9998	1	D-Glucosamine	1	0	Consistent	Consistent	-1	5	0	5	0	Degradation	Carbohydrate	Aminosugars metabolism	D-Glucosamine	249.385	0.00092458	1	0	Enriched	g__Eubacterium.s__Eubacterium_rectale	g__Eubacterium	0.615648	1	g__Eubacterium	K02763	0.990518	C00329	C00352	1	1	0	2
g__Eubacterium.s__Eubacterium_rectale	C00329	0.108616	0.000149993	0.000837458	0.9998	1	D-Glucosamine	1	0	Consistent	Consistent	-1	5	0	5	0	Degradation	Carbohydrate	Aminosugars metabolism	D-Glucosamine	249.385	0.00092458	1	0	Enriched	g__Eubacterium.s__Eubacterium_rectale	g__Eubacterium	0.615648	1	g__Eubacterium	K02764	0.990518	C00329	C00352	1	1	0	2
g__Eubacterium.s__Eubacterium_rectale	C00329	0.108616	0.000149993	0.000837458	0.9998	1	D-Glucosamine	1	0	Consistent	Consistent	-1	5	0	5	0	Degradation	Carbohydrate	Aminosugars metabolism	D-Glucosamine	249.385	0.00092458	1	0	Enriched	g__Eubacterium.s__Eubacterium_rectale	g__Eubacterium	0.615648	1	g__Eubacterium	K02765	0.990518	C00329	C00352	1	1	0	2
g__Eubacterium.s__Eubacterium_ventriosum	C01921	0.235742	5e-05	0.000352614	1	1	Glycocholate	1	0	Consistent	Consistent	-1	1	0	1	0	Degradation	NA	NA	Glycocholate	-57.4372	0.0122754	0	1	Depleted	g__Eubacterium.s__Eubacterium_ventriosum	g__Eubacterium	0.621881	1	g__Eubacterium	K01442	NA	C01921	C00037	1	1	0	1
g__Eubacterium.s__Eubacterium_ventriosum	C01921	0.235742	5e-05	0.000352614	1	1	Glycocholate	1	0	Consistent	Consistent	-1	1	0	1	0	Degradation	NA	NA	Glycocholate	-57.4372	0.0122754	0	1	Depleted	g__Eubacterium.s__Eubacterium_ventriosum	g__Eubacterium	0.621881	1	g__Eubacterium	K01442	NA	C01921	C00695	1	1	0	1
g__Eubacterium.s__Eubacterium_ventriosum	C05122	0.141147	0.0001	0.00060906	0.9998	1	Taurocholate	1	0	Consistent	Consistent	-1	1	0	1	0	Degradation	Lipid	Bile acid metabolism	Taurocholate	-379.464	2.55e-05	0	1	Depleted	g__Eubacterium.s__Eubacterium_ventriosum	g__Eubacterium	0.621881	1	g__Eubacterium	K01442	NA	C05122	C00245	1	1	0	1
g__Eubacterium.s__Eubacterium_ventriosum	C05122	0.141147	0.0001	0.00060906	0.9998	1	Taurocholate	1	0	Consistent	Consistent	-1	1	0	1	0	Degradation	Lipid	Bile acid metabolism	Taurocholate	-379.464	2.55e-05	0	1	Depleted	g__Eubacterium.s__Eubacterium_ventriosum	g__Eubacterium	0.621881	1	g__Eubacterium	K01442	NA	C05122	C00695	1	1	0	1
g__Faecalibacterium.s__Faecalibacterium_prausnitzii	C00329	0.108616	0.000149993	0.000837458	0.9998	1	D-Glucosamine	1	0	Consistent	Consistent	-1	5	0	5	0	Degradation	Carbohydrate	Aminosugars metabolism	D-Glucosamine	249.385	0.00092458	1	0	Enriched	g__Faecalibacterium.s__Faecalibacterium_prausnitzii	g__Faecalibacterium	0.663774	1	g__Faecalibacterium	K02763	0.990518	C00329	C00352	1	1	0	2
g__Faecalibacterium.s__Faecalibacterium_prausnitzii	C00329	0.108616	0.000149993	0.000837458	0.9998	1	D-Glucosamine	1	0	Consistent	Consistent	-1	5	0	5	0	Degradation	Carbohydrate	Aminosugars metabolism	D-Glucosamine	249.385	0.00092458	1	0	Enriched	g__Faecalibacterium.s__Faecalibacterium_prausnitzii	g__Faecalibacterium	0.663774	1	g__Faecalibacterium	K02764	0.990518	C00329	C00352	1	1	0	2
g__Faecalibacterium.s__Faecalibacterium_prausnitzii	C00329	0.108616	0.000149993	0.000837458	0.9998	1	D-Glucosamine	1	0	Consistent	Consistent	-1	5	0	5	0	Degradation	Carbohydrate	Aminosugars metabolism	D-Glucosamine	249.385	0.00092458	1	0	Enriched	g__Faecalibacterium.s__Faecalibacterium_prausnitzii	g__Faecalibacterium	0.663774	1	g__Faecalibacterium	K02765	0.990518	C00329	C00352	1	1	0	2
g__Faecalibacterium.s__Faecalibacterium_prausnitzii	C01921	0.235742	5e-05	0.000352614	1	1	Glycocholate	1	0	Consistent	Consistent	-1	1	0	1	0	Degradation	NA	NA	Glycocholate	-57.4372	0.0122754	0	1	Depleted	g__Faecalibacterium.s__Faecalibacterium_prausnitzii	g__Faecalibacterium	0.605395	1	g__Faecalibacterium	K01442	NA	C01921	C00037	1	1	0	1
g__Faecalibacterium.s__Faecalibacterium_prausnitzii	C01921	0.235742	5e-05	0.000352614	1	1	Glycocholate	1	0	Consistent	Consistent	-1	1	0	1	0	Degradation	NA	NA	Glycocholate	-57.4372	0.0122754	0	1	Depleted	g__Faecalibacterium.s__Faecalibacterium_prausnitzii	g__Faecalibacterium	0.605395	1	g__Faecalibacterium	K01442	NA	C01921	C00695	1	1	0	1
g__Faecalibacterium.s__Faecalibacterium_prausnitzii	C05122	0.141147	0.0001	0.00060906	0.9998	1	Taurocholate	1	0	Consistent	Consistent	-1	1	0	1	0	Degradation	Lipid	Bile acid metabolism	Taurocholate	-379.464	2.55e-05	0	1	Depleted	g__Faecalibacterium.s__Faecalibacterium_prausnitzii	g__Faecalibacterium	0.605395	1	g__Faecalibacterium	K01442	NA	C05122	C00245	1	1	0	1
g__Faecalibacterium.s__Faecalibacterium_prausnitzii	C05122	0.141147	0.0001	0.00060906	0.9998	1	Taurocholate	1	0	Consistent	Consistent	-1	1	0	1	0	Degradation	Lipid	Bile acid metabolism	Taurocholate	-379.464	2.55e-05	0	1	Depleted	g__Faecalibacterium.s__Faecalibacterium_prausnitzii	g__Faecalibacterium	0.605395	1	g__Faecalibacterium	K01442	NA	C05122	C00695	1	1	0	1
g__Fusobacterium.s__Fusobacterium_nucleatum	C05382	0.172812	5e-05	0.000352614	1	1	Sedoheptulose 7-phosphate	1	0	Consistent	Consistent	-1	1	0	1	0	Degradation	Carbohydrate	Nucleotide sugars pentose metabolism	Sedoheptulose 7-phosphate	-9.87944	0.0287404	0	1	Depleted	g__Fusobacterium.s__Fusobacterium_nucleatum	g__Fusobacterium	0.521195	1	g__Fusobacterium	K03271	NA	C05382	C07836	1	1	0	1
g__Fusobacterium.s__Fusobacterium_nucleatum	C05382	0.172812	5e-05	0.000352614	1	1	Sedoheptulose 7-phosphate	1	0	Consistent	Consistent	-1	1	0	1	0	Degradation	Carbohydrate	Nucleotide sugars pentose metabolism	Sedoheptulose 7-phosphate	-9.87944	0.0287404	0	1	Depleted	g__Fusobacterium.s__Fusobacterium_nucleatum	g__Fusobacterium	0.521195	1	g__Fusobacterium	K03271	NA	C05382	C19878	1	1	0	1
g__Gordonibacter.s__Gordonibacter_pamelaeae	C00581	0.169709	5e-05	0.000352614	1	1	Guanidinoacetate	1	0	Consistent	Consistent	1	0	1	0	1	Synthesis	NA	NA	Guanidinoacetate	-93.148	0.0137879	0	1	Depleted	g__Gordonibacter.s__Gordonibacter_pamelaeae	g__Gordonibacter	0.563164	1	g__Gordonibacter	K00613	NA	C00037	C00581	1	1	0	1
g__Haemophilus.s__Haemophilus_parainfluenzae	C00122	0.117103	0.00019999	0.000992543	0.9999	1	Fumarate	1	0	Consistent	Consistent	1	0	2	0	2	Synthesis	Energy	Krebs cycle	Fumarate	70.2421	0.0417473	1	0	Enriched	g__Haemophilus.s__Haemophilus_parainfluenzae	g__Haemophilus	0.611096	1	g__Haemophilus	K01744	0.805548	C00049	C00122	1	1	0	2
g__Haemophilus.s__Haemophilus_parainfluenzae	C00122	0.117103	0.00019999	0.000992543	0.9999	1	Fumarate	1	0	Consistent	Consistent	1	0	2	0	2	Synthesis	Energy	Krebs cycle	Fumarate	70.2421	0.0417473	1	0	Enriched	g__Haemophilus.s__Haemophilus_parainfluenzae	g__Haemophilus	0.611096	1	g__Haemophilus	K01756	0.548901	C03794	C00122	1	1	0	2
g__Haemophilus.s__Haemophilus_parainfluenzae	C05382	0.172812	5e-05	0.000352614	1	1	Sedoheptulose 7-phosphate	1	0	Consistent	Consistent	-1	1	0	1	0	Degradation	Carbohydrate	Nucleotide sugars pentose metabolism	Sedoheptulose 7-phosphate	-9.87944	0.0287404	0	1	Depleted	g__Haemophilus.s__Haemophilus_parainfluenzae	g__Haemophilus	0.672902	1	g__Haemophilus	K03271	NA	C05382	C07836	1	1	0	1
g__Haemophilus.s__Haemophilus_parainfluenzae	C05382	0.172812	5e-05	0.000352614	1	1	Sedoheptulose 7-phosphate	1	0	Consistent	Consistent	-1	1	0	1	0	Degradation	Carbohydrate	Nucleotide sugars pentose metabolism	Sedoheptulose 7-phosphate	-9.87944	0.0287404	0	1	Depleted	g__Haemophilus.s__Haemophilus_parainfluenzae	g__Haemophilus	0.672902	1	g__Haemophilus	K03271	NA	C05382	C19878	1	1	0	1
g__Klebsiella.s__Klebsiella_pneumoniae	C00019	0.102426	0.00174991	0.00689671	0.99805	1	S-Adenosyl-L-methionine	1	0	Consistent	Consistent	-1	6	0	6	0	Degradation	NA	NA	S-Adenosyl-L-methionine	-30.0359	1.28e-09	0	1	Depleted	g__Klebsiella.s__Klebsiella_pneumoniae	g__Klebsiella	0.508864	1	g__Klebsiella	K00558	0.555901	C00019	C00021	1	1	0	2
g__Klebsiella.s__Klebsiella_pneumoniae	C00019	0.102426	0.00174991	0.00689671	0.99805	1	S-Adenosyl-L-methionine	1	0	Consistent	Consistent	-1	6	0	6	0	Degradation	NA	NA	S-Adenosyl-L-methionine	-30.0359	1.28e-09	0	1	Depleted	g__Klebsiella.s__Klebsiella_pneumoniae	g__Klebsiella	0.508864	1	g__Klebsiella	K00568	0.929856	C00019	C00021	1	1	0	2
g__Klebsiella.s__Klebsiella_pneumoniae	C00019	0.102426	0.00174991	0.00689671	0.99805	1	S-Adenosyl-L-methionine	1	0	Consistent	Consistent	-1	6	0	6	0	Degradation	NA	NA	S-Adenosyl-L-methionine	-30.0359	1.28e-09	0	1	Depleted	g__Klebsiella.s__Klebsiella_pneumoniae	g__Klebsiella	0.508864	1	g__Klebsiella	K00568	0.929856	C00019	C00399	1	1	0	2
g__Klebsiella.s__Klebsiella_pneumoniae	C00019	0.102426	0.00174991	0.00689671	0.99805	1	S-Adenosyl-L-methionine	1	0	Consistent	Consistent	-1	6	0	6	0	Degradation	NA	NA	S-Adenosyl-L-methionine	-30.0359	1.28e-09	0	1	Depleted	g__Klebsiella.s__Klebsiella_pneumoniae	g__Klebsiella	0.508864	1	g__Klebsiella	K01611	0.962873	C00019	C01137	1	1	0	2
g__Klebsiella.s__Klebsiella_pneumoniae	C00576	0.153109	5e-05	0.000352614	1	1	Betaine aldehyde	1	0	Consistent	Consistent	-1	1	3	1	0	Degradation	NA	NA	Betaine aldehyde	-121.225	0.838754	0	0	None	g__Klebsiella.s__Klebsiella_pneumoniae	g__Klebsiella	0.720317	1	g__Klebsiella	K00130	-0.725792	C00576	C00719	1	1	0	1
g__Klebsiella.s__Klebsiella_pneumoniae	C00719	0.122171	0.000249988	0.00119637	0.99985	1	Betaine	1	0	Consistent	Consistent	1	0	1	0	1	Synthesis	NA	NA	Betaine	-51.5735	0.0584724	0	1	Depleted	g__Klebsiella.s__Klebsiella_pneumoniae	g__Klebsiella	0.696212	1	g__Klebsiella	K00130	NA	C00576	C00719	1	1	0	1
g__Klebsiella.s__Klebsiella_pneumoniae	C01586	0.203967	0.0001	0.00060906	0.99995	1	Hippurate	1	0	Consistent	Consistent	-1	1	0	1	0	Degradation	Xenobiotics	Benzoate metabolism	Hippurate	-252.858	0.0138779	0	1	Depleted	g__Klebsiella.s__Klebsiella_pneumoniae	g__Klebsiella	0.953011	1	g__Klebsiella	K01451	NA	C01586	C00180	1	1	0	1
g__Lactobacillus.s__Lactobacillus_fermentum	C00294	0.208429	5e-05	0.000352614	1	1	Inosine	1	0	Consistent	Consistent	0	2	6	2	6	Combination	NA	NA	Inosine	-44.3396	0.000196628	0	1	Depleted	g__Lactobacillus.s__Lactobacillus_fermentum	g__Lactobacillus	0.531261	1	g__Lactobacillus	K01239	0.826085	C00294	C00262	1	1	0	2
g__Lactobacillus.s__Lactobacillus_fermentum	C00387	0.178161	5e-05	0.000352614	1	1	Guanosine	1	0	Consistent	Consistent	0	2	6	2	6	Combination	Nucleotide	Purine metabolism, guanine containing	Guanosine	1.85999	0.00791319	1	0	Enriched	g__Lactobacillus.s__Lactobacillus_fermentum	g__Lactobacillus	0.549795	1	g__Lactobacillus	K01239	0.831281	C00387	C00242	1	1	0	2
g__Megamonas.s__Megamonas_funiformis	C01096	0.143533	0.000299985	0.00133993	0.99955	1	Sorbitol 6-phosphate	1	0	Consistent	Consistent	1	0	3	0	3	Synthesis	NA	NA	Sorbitol 6-phosphate	-11.4284	0.0461999	0	1	Depleted	g__Megamonas.s__Megamonas_funiformis	g__Megamonas	0.677562	1	g__Megamonas	K02781	0.989542	C00794	C01096	1	1	0	2
g__Megamonas.s__Megamonas_funiformis	C01096	0.143533	0.000299985	0.00133993	0.99955	1	Sorbitol 6-phosphate	1	0	Consistent	Consistent	1	0	3	0	3	Synthesis	NA	NA	Sorbitol 6-phosphate	-11.4284	0.0461999	0	1	Depleted	g__Megamonas.s__Megamonas_funiformis	g__Megamonas	0.677562	1	g__Megamonas	K02782	0.996948	C00794	C01096	1	1	0	2
g__Megamonas.s__Megamonas_funiformis	C01096	0.143533	0.000299985	0.00133993	0.99955	1	Sorbitol 6-phosphate	1	0	Consistent	Consistent	1	0	3	0	3	Synthesis	NA	NA	Sorbitol 6-phosphate	-11.4284	0.0461999	0	1	Depleted	g__Megamonas.s__Megamonas_funiformis	g__Megamonas	0.677562	1	g__Megamonas	K02783	0.957406	C00794	C01096	1	1	0	2
g__Megamonas.s__Megamonas_hypermegale	C01096	0.143533	0.000299985	0.00133993	0.99955	1	Sorbitol 6-phosphate	1	0	Consistent	Consistent	1	0	3	0	3	Synthesis	NA	NA	Sorbitol 6-phosphate	-11.4284	0.0461999	0	1	Depleted	g__Megamonas.s__Megamonas_hypermegale	g__Megamonas	0.753762	1	g__Megamonas	K02781	0.989542	C00794	C01096	1	1	0	2
g__Megamonas.s__Megamonas_hypermegale	C01096	0.143533	0.000299985	0.00133993	0.99955	1	Sorbitol 6-phosphate	1	0	Consistent	Consistent	1	0	3	0	3	Synthesis	NA	NA	Sorbitol 6-phosphate	-11.4284	0.0461999	0	1	Depleted	g__Megamonas.s__Megamonas_hypermegale	g__Megamonas	0.753762	1	g__Megamonas	K02782	0.996948	C00794	C01096	1	1	0	2
g__Megamonas.s__Megamonas_hypermegale	C01096	0.143533	0.000299985	0.00133993	0.99955	1	Sorbitol 6-phosphate	1	0	Consistent	Consistent	1	0	3	0	3	Synthesis	NA	NA	Sorbitol 6-phosphate	-11.4284	0.0461999	0	1	Depleted	g__Megamonas.s__Megamonas_hypermegale	g__Megamonas	0.753762	1	g__Megamonas	K02783	0.957406	C00794	C01096	1	1	0	2
g__Roseburia.s__Roseburia_hominis	C01921	0.235742	5e-05	0.000352614	1	1	Glycocholate	1	0	Consistent	Consistent	-1	1	0	1	0	Degradation	NA	NA	Glycocholate	-57.4372	0.0122754	0	1	Depleted	g__Roseburia.s__Roseburia_hominis	g__Roseburia	0.503616	1	g__Roseburia	K01442	NA	C01921	C00037	1	1	0	1
g__Roseburia.s__Roseburia_hominis	C01921	0.235742	5e-05	0.000352614	1	1	Glycocholate	1	0	Consistent	Consistent	-1	1	0	1	0	Degradation	NA	NA	Glycocholate	-57.4372	0.0122754	0	1	Depleted	g__Roseburia.s__Roseburia_hominis	g__Roseburia	0.503616	1	g__Roseburia	K01442	NA	C01921	C00695	1	1	0	1
g__Roseburia.s__Roseburia_hominis	C05122	0.141147	0.0001	0.00060906	0.9998	1	Taurocholate	1	0	Consistent	Consistent	-1	1	0	1	0	Degradation	Lipid	Bile acid metabolism	Taurocholate	-379.464	2.55e-05	0	1	Depleted	g__Roseburia.s__Roseburia_hominis	g__Roseburia	0.503616	1	g__Roseburia	K01442	NA	C05122	C00245	1	1	0	1
g__Roseburia.s__Roseburia_hominis	C05122	0.141147	0.0001	0.00060906	0.9998	1	Taurocholate	1	0	Consistent	Consistent	-1	1	0	1	0	Degradation	Lipid	Bile acid metabolism	Taurocholate	-379.464	2.55e-05	0	1	Depleted	g__Roseburia.s__Roseburia_hominis	g__Roseburia	0.503616	1	g__Roseburia	K01442	NA	C05122	C00695	1	1	0	1
g__Roseburia.s__Roseburia_intestinalis	C01921	0.235742	5e-05	0.000352614	1	1	Glycocholate	1	0	Consistent	Consistent	-1	1	0	1	0	Degradation	NA	NA	Glycocholate	-57.4372	0.0122754	0	1	Depleted	g__Roseburia.s__Roseburia_intestinalis	g__Roseburia	0.627156	1	g__Roseburia	K01442	NA	C01921	C00037	1	1	0	1
g__Roseburia.s__Roseburia_intestinalis	C01921	0.235742	5e-05	0.000352614	1	1	Glycocholate	1	0	Consistent	Consistent	-1	1	0	1	0	Degradation	NA	NA	Glycocholate	-57.4372	0.0122754	0	1	Depleted	g__Roseburia.s__Roseburia_intestinalis	g__Roseburia	0.627156	1	g__Roseburia	K01442	NA	C01921	C00695	1	1	0	1
g__Roseburia.s__Roseburia_intestinalis	C05122	0.141147	0.0001	0.00060906	0.9998	1	Taurocholate	1	0	Consistent	Consistent	-1	1	0	1	0	Degradation	Lipid	Bile acid metabolism	Taurocholate	-379.464	2.55e-05	0	1	Depleted	g__Roseburia.s__Roseburia_intestinalis	g__Roseburia	0.627156	1	g__Roseburia	K01442	NA	C05122	C00245	1	1	0	1
g__Roseburia.s__Roseburia_intestinalis	C05122	0.141147	0.0001	0.00060906	0.9998	1	Taurocholate	1	0	Consistent	Consistent	-1	1	0	1	0	Degradation	Lipid	Bile acid metabolism	Taurocholate	-379.464	2.55e-05	0	1	Depleted	g__Roseburia.s__Roseburia_intestinalis	g__Roseburia	0.627156	1	g__Roseburia	K01442	NA	C05122	C00695	1	1	0	1
g__Roseburia.s__Roseburia_inulinivorans	C01921	0.235742	5e-05	0.000352614	1	1	Glycocholate	1	0	Consistent	Consistent	-1	1	0	1	0	Degradation	NA	NA	Glycocholate	-57.4372	0.0122754	0	1	Depleted	g__Roseburia.s__Roseburia_inulinivorans	g__Roseburia	0.56134	1	g__Roseburia	K01442	NA	C01921	C00037	1	1	0	1
g__Roseburia.s__Roseburia_inulinivorans	C01921	0.235742	5e-05	0.000352614	1	1	Glycocholate	1	0	Consistent	Consistent	-1	1	0	1	0	Degradation	NA	NA	Glycocholate	-57.4372	0.0122754	0	1	Depleted	g__Roseburia.s__Roseburia_inulinivorans	g__Roseburia	0.56134	1	g__Roseburia	K01442	NA	C01921	C00695	1	1	0	1
g__Roseburia.s__Roseburia_inulinivorans	C05122	0.141147	0.0001	0.00060906	0.9998	1	Taurocholate	1	0	Consistent	Consistent	-1	1	0	1	0	Degradation	Lipid	Bile acid metabolism	Taurocholate	-379.464	2.55e-05	0	1	Depleted	g__Roseburia.s__Roseburia_inulinivorans	g__Roseburia	0.56134	1	g__Roseburia	K01442	NA	C05122	C00245	1	1	0	1
g__Roseburia.s__Roseburia_inulinivorans	C05122	0.141147	0.0001	0.00060906	0.9998	1	Taurocholate	1	0	Consistent	Consistent	-1	1	0	1	0	Degradation	Lipid	Bile acid metabolism	Taurocholate	-379.464	2.55e-05	0	1	Depleted	g__Roseburia.s__Roseburia_inulinivorans	g__Roseburia	0.56134	1	g__Roseburia	K01442	NA	C05122	C00695	1	1	0	1
g__Streptococcus.s__Streptococcus_mutans	C00122	0.117103	0.00019999	0.000992543	0.9999	1	Fumarate	1	0	Consistent	Consistent	1	0	2	0	2	Synthesis	Energy	Krebs cycle	Fumarate	70.2421	0.0417473	1	0	Enriched	g__Streptococcus.s__Streptococcus_mutans	g__Streptococcus	0.563644	1	g__Streptococcus	K01756	0.548901	C03794	C00122	1	1	0	2
g__Veillonella.s__Veillonella_atypica	C00122	0.117103	0.00019999	0.000992543	0.9999	1	Fumarate	1	0	Consistent	Consistent	1	0	2	0	2	Synthesis	Energy	Krebs cycle	Fumarate	70.2421	0.0417473	1	0	Enriched	g__Veillonella.s__Veillonella_atypica	g__Veillonella	0.666872	1	g__Veillonella	K01744	0.805548	C00049	C00122	1	1	0	2
g__Veillonella.s__Veillonella_atypica	C00122	0.117103	0.00019999	0.000992543	0.9999	1	Fumarate	1	0	Consistent	Consistent	1	0	2	0	2	Synthesis	Energy	Krebs cycle	Fumarate	70.2421	0.0417473	1	0	Enriched	g__Veillonella.s__Veillonella_atypica	g__Veillonella	0.666872	1	g__Veillonella	K01756	0.548901	C03794	C00122	1	1	0	2
g__Veillonella.s__Veillonella_dispar	C05382	0.172812	5e-05	0.000352614	1	1	Sedoheptulose 7-phosphate	1	0	Consistent	Consistent	-1	1	0	1	0	Degradation	Carbohydrate	Nucleotide sugars pentose metabolism	Sedoheptulose 7-phosphate	-9.87944	0.0287404	0	1	Depleted	g__Veillonella.s__Veillonella_dispar	g__Veillonella	0.640267	1	g__Veillonella	K03271	NA	C05382	C07836	1	1	0	1
g__Veillonella.s__Veillonella_dispar	C05382	0.172812	5e-05	0.000352614	1	1	Sedoheptulose 7-phosphate	1	0	Consistent	Consistent	-1	1	0	1	0	Degradation	Carbohydrate	Nucleotide sugars pentose metabolism	Sedoheptulose 7-phosphate	-9.87944	0.0287404	0	1	Depleted	g__Veillonella.s__Veillonella_dispar	g__Veillonella	0.640267	1	g__Veillonella	K03271	NA	C05382	C19878	1	1	0	1
g__Veillonella.s__Veillonella_parvula	C00122	0.117103	0.00019999	0.000992543	0.9999	1	Fumarate	1	0	Consistent	Consistent	1	0	2	0	2	Synthesis	Energy	Krebs cycle	Fumarate	70.2421	0.0417473	1	0	Enriched	g__Veillonella.s__Veillonella_parvula	g__Veillonella	0.576335	1	g__Veillonella	K01744	0.805548	C00049	C00122	1	1	0	2
g__Veillonella.s__Veillonella_parvula	C00122	0.117103	0.00019999	0.000992543	0.9999	1	Fumarate	1	0	Consistent	Consistent	1	0	2	0	2	Synthesis	Energy	Krebs cycle	Fumarate	70.2421	0.0417473	1	0	Enriched	g__Veillonella.s__Veillonella_parvula	g__Veillonella	0.576335	1	g__Veillonella	K01756	0.548901	C03794	C00122	1	1	0	2
g__Veillonella.s__Veillonella_parvula	C05382	0.172812	5e-05	0.000352614	1	1	Sedoheptulose 7-phosphate	1	0	Consistent	Consistent	-1	1	0	1	0	Degradation	Carbohydrate	Nucleotide sugars pentose metabolism	Sedoheptulose 7-phosphate	-9.87944	0.0287404	0	1	Depleted	g__Veillonella.s__Veillonella_parvula	g__Veillonella	0.654035	1	g__Veillonella	K03271	NA	C05382	C07836	1	1	0	1
g__Veillonella.s__Veillonella_parvula	C05382	0.172812	5e-05	0.000352614	1	1	Sedoheptulose 7-phosphate	1	0	Consistent	Consistent	-1	1	0	1	0	Degradation	Carbohydrate	Nucleotide sugars pentose metabolism	Sedoheptulose 7-phosphate	-9.87944	0.0287404	0	1	Depleted	g__Veillonella.s__Veillonella_parvula	g__Veillonella	0.654035	1	g__Veillonella	K03271	NA	C05382	C19878	1	1	0	1
unclassified	C00183	0.167195	5e-05	0.000352614	1	1	L-Valine	1	0	Consistent	Consistent	-1	1	0	1	0	Degradation	Amino acid	Valine, leucine and isoleucine metabolism	L-Valine	4966.92	0.0137748	1	0	Enriched	unclassified	unclassified	0.84215	1	unclassified	K01873	NA	C00183	C02554	1	1	0	1
unclassified	C05382	0.172812	5e-05	0.000352614	1	1	Sedoheptulose 7-phosphate	1	0	Consistent	Consistent	-1	1	0	1	0	Degradation	Carbohydrate	Nucleotide sugars pentose metabolism	Sedoheptulose 7-phosphate	-9.87944	0.0287404	0	1	Depleted	unclassified	unclassified	0.515306	1	unclassified	K03271	NA	C05382	C07836	1	1	0	1
unclassified	C05382	0.172812	5e-05	0.000352614	1	1	Sedoheptulose 7-phosphate	1	0	Consistent	Consistent	-1	1	0	1	0	Degradation	Carbohydrate	Nucleotide sugars pentose metabolism	Sedoheptulose 7-phosphate	-9.87944	0.0287404	0	1	Depleted	unclassified	unclassified	0.515306	1	unclassified	K03271	NA	C05382	C19878	1	1	0	1
g__Akkermansia.s__Akkermansia_muciniphila	C04501	-0.271446	1	1	5e-05	0.000372204	N-Acetyl-alpha-D-glucosamine 1-phosphate	0	1	Contrasting	Contrasting	1	0	2	0	1	Synthesis	NA	NA	N-Acetyl-alpha-D-glucosamine 1-phosphate	-41.7999	5.5e-06	0	1	Depleted	g__Akkermansia.s__Akkermansia_muciniphila	g__Akkermansia	0.988541	1	g__Akkermansia	K07102	0.263362	C00140	C04501	1	1	0	1
g__Bacteroides.s__Bacteroides_uniformis	C00785	-0.212018	1	1	5e-05	0.000372204	Urocanate	0	1	Contrasting	Contrasting	1	2	1	0	1	Synthesis	Amino acid	Histidine metabolism	Urocanate	513.56	0.000603869	1	0	Enriched	g__Bacteroides.s__Bacteroides_uniformis	g__Bacteroides	0.545038	1	g__Bacteroides	K01745	0.0168882	C00135	C00785	1	1	0	1
g__Bacteroides.s__Bacteroides_vulgatus	C00255	-0.144628	1	1	0.0001	0.000669967	Riboflavin	0	1	Contrasting	Contrasting	0	2	3	2	3	Combination	Cofactors and vitamins	Riboflavin metabolism	Riboflavin	24.5893	0.0139606	1	0	Enriched	g__Bacteroides.s__Bacteroides_vulgatus	g__Bacteroides	0.602575	1	g__Bacteroides	K09474	0.61787	C00061	C00255	1	1	0	2
g__Bacteroides.s__Bacteroides_vulgatus	C00270	-0.229038	1	1	5e-05	0.000372204	N-Acetylneuraminate	0	1	Contrasting	Contrasting	-1	1	1	1	0	Degradation	Carbohydrate	Aminosugars metabolism	N-Acetylneuraminate	652.995	0.544534	0	0	None	g__Bacteroides.s__Bacteroides_vulgatus	g__Bacteroides	0.504697	1	g__Bacteroides	K01654	0.958559	C00645	C00270	1	1	0	0
g__Bacteroides.s__Bacteroides_vulgatus	C00785	-0.212018	1	1	5e-05	0.000372204	Urocanate	0	1	Contrasting	Contrasting	1	2	1	0	1	Synthesis	Amino acid	Histidine metabolism	Urocanate	513.56	0.000603869	1	0	Enriched	g__Bacteroides.s__Bacteroides_vulgatus	g__Bacteroides	0.60847	1	g__Bacteroides	K01745	0.0168882	C00135	C00785	1	1	0	1
g__Bifidobacterium.s__Bifidobacterium_animalis	C00103	-0.235879	1	1	5e-05	0.000372204	D-Glucose 1-phosphate	0	1	Contrasting	Contrasting	0	1	2	1	2	Combination	NA	NA	D-Glucose 1-phosphate	-7.84566	0.00985627	0	1	Depleted	g__Bifidobacterium.s__Bifidobacterium_animalis	g__Bifidobacterium	0.623131	1	g__Bifidobacterium	K16148	0.62344	C00103	C20237	1	1	0	2
g__Bifidobacterium.s__Bifidobacterium_bifidum	C00103	-0.235879	1	1	5e-05	0.000372204	D-Glucose 1-phosphate	0	1	Contrasting	Contrasting	0	1	2	1	2	Combination	NA	NA	D-Glucose 1-phosphate	-7.84566	0.00985627	0	1	Depleted	g__Bifidobacterium.s__Bifidobacterium_bifidum	g__Bifidobacterium	0.677641	1	g__Bifidobacterium	K16148	0.62344	C00103	C20237	1	1	0	2
g__Bifidobacterium.s__Bifidobacterium_bifidum	C00637	-0.227622	1	1	5e-05	0.000372204	Indole-3-acetaldehyde	0	1	Contrasting	Contrasting	-1	1	2	1	0	Degradation	NA	NA	Indole-3-acetaldehyde	-127.829	0.115513	0	0	None	g__Bifidobacterium.s__Bifidobacterium_bifidum	g__Bifidobacterium	0.545091	1	g__Bifidobacterium	K00128	0.327094	C00637	C00954	1	1	0	1
g__Bifidobacterium.s__Bifidobacterium_bifidum	C02835	-0.162446	0.99995	1	5e-05	0.000372204	Imidazole-4-acetate	0	1	Contrasting	Contrasting	1	0	1	0	1	Synthesis	NA	NA	Imidazole-4-acetate	22.0551	0.0513448	1	0	Enriched	g__Bifidobacterium.s__Bifidobacterium_bifidum	g__Bifidobacterium	0.56005	1	g__Bifidobacterium	K00128	NA	C05130	C02835	1	1	0	1
g__Bifidobacterium.s__Bifidobacterium_dentium	C00491	-0.295576	1	1	5e-05	0.000372204	L-Cystine	0	1	Contrasting	Contrasting	-1	4	0	4	0	Degradation	Amino acid	Cysteine, methionine, SAM, taurine metabolism	L-Cystine	22.5735	0.671575	0	0	None	g__Bifidobacterium.s__Bifidobacterium_dentium	g__Bifidobacterium	0.513379	1	g__Bifidobacterium	K01760	0.889664	C00491	C01962	1	1	0	2
g__Bifidobacterium.s__Bifidobacterium_dentium	C00491	-0.295576	1	1	5e-05	0.000372204	L-Cystine	0	1	Contrasting	Contrasting	-1	4	0	4	0	Degradation	Amino acid	Cysteine, methionine, SAM, taurine metabolism	L-Cystine	22.5735	0.671575	0	0	None	g__Bifidobacterium.s__Bifidobacterium_dentium	g__Bifidobacterium	0.513379	1	g__Bifidobacterium	K14155	0.834509	C00491	C01962	1	1	0	2
g__Bifidobacterium.s__Bifidobacterium_longum	C00103	-0.235879	1	1	5e-05	0.000372204	D-Glucose 1-phosphate	0	1	Contrasting	Contrasting	0	1	2	1	2	Combination	NA	NA	D-Glucose 1-phosphate	-7.84566	0.00985627	0	1	Depleted	g__Bifidobacterium.s__Bifidobacterium_longum	g__Bifidobacterium	0.653045	1	g__Bifidobacterium	K16148	0.62344	C00103	C20237	1	1	0	2
g__Bifidobacterium.s__Bifidobacterium_longum	C00253	-0.124374	0.99975	1	5e-05	0.000372204	Nicotinate	0	1	Contrasting	Contrasting	1	0	1	0	1	Synthesis	Cofactors and vitamins	Nicotinate and nicotinamide metabolism	Nicotinate	473.435	1.08e-08	1	0	Enriched	g__Bifidobacterium.s__Bifidobacterium_longum	g__Bifidobacterium	0.699612	1	g__Bifidobacterium	K08281	NA	C00153	C00253	1	1	0	1
g__Bifidobacterium.s__Bifidobacterium_longum	C00491	-0.295576	1	1	5e-05	0.000372204	L-Cystine	0	1	Contrasting	Contrasting	-1	4	0	4	0	Degradation	Amino acid	Cysteine, methionine, SAM, taurine metabolism	L-Cystine	22.5735	0.671575	0	0	None	g__Bifidobacterium.s__Bifidobacterium_longum	g__Bifidobacterium	0.504624	1	g__Bifidobacterium	K01758	0.995578	C00491	C01962	1	1	0	2
g__Bifidobacterium.s__Bifidobacterium_longum	C00491	-0.295576	1	1	5e-05	0.000372204	L-Cystine	0	1	Contrasting	Contrasting	-1	4	0	4	0	Degradation	Amino acid	Cysteine, methionine, SAM, taurine metabolism	L-Cystine	22.5735	0.671575	0	0	None	g__Bifidobacterium.s__Bifidobacterium_longum	g__Bifidobacterium	0.504624	1	g__Bifidobacterium	K01760	0.889664	C00491	C01962	1	1	0	2
g__Bifidobacterium.s__Bifidobacterium_longum	C00491	-0.295576	1	1	5e-05	0.000372204	L-Cystine	0	1	Contrasting	Contrasting	-1	4	0	4	0	Degradation	Amino acid	Cysteine, methionine, SAM, taurine metabolism	L-Cystine	22.5735	0.671575	0	0	None	g__Bifidobacterium.s__Bifidobacterium_longum	g__Bifidobacterium	0.504624	1	g__Bifidobacterium	K14155	0.834509	C00491	C01962	1	1	0	2
g__Bifidobacterium.s__Bifidobacterium_longum	C00637	-0.227622	1	1	5e-05	0.000372204	Indole-3-acetaldehyde	0	1	Contrasting	Contrasting	-1	1	2	1	0	Degradation	NA	NA	Indole-3-acetaldehyde	-127.829	0.115513	0	0	None	g__Bifidobacterium.s__Bifidobacterium_longum	g__Bifidobacterium	0.751653	1	g__Bifidobacterium	K00128	0.327094	C00637	C00954	1	1	0	1
g__Bifidobacterium.s__Bifidobacterium_longum	C02835	-0.162446	0.99995	1	5e-05	0.000372204	Imidazole-4-acetate	0	1	Contrasting	Contrasting	1	0	1	0	1	Synthesis	NA	NA	Imidazole-4-acetate	22.0551	0.0513448	1	0	Enriched	g__Bifidobacterium.s__Bifidobacterium_longum	g__Bifidobacterium	0.773822	1	g__Bifidobacterium	K00128	NA	C05130	C02835	1	1	0	1
g__Bifidobacterium.s__Bifidobacterium_pseudocatenulatum	C00103	-0.235879	1	1	5e-05	0.000372204	D-Glucose 1-phosphate	0	1	Contrasting	Contrasting	0	1	2	1	2	Combination	NA	NA	D-Glucose 1-phosphate	-7.84566	0.00985627	0	1	Depleted	g__Bifidobacterium.s__Bifidobacterium_pseudocatenulatum	g__Bifidobacterium	0.733879	1	g__Bifidobacterium	K16148	0.62344	C00103	C20237	1	1	0	2
g__Escherichia.s__Escherichia_coli	C00242	-0.114083	0.99965	1	0.000349983	0.00195407	Guanine	0	1	Contrasting	Contrasting	0	1	2	1	2	Combination	Nucleotide	Purine metabolism, guanine containing	Guanine	7.11517	0.899017	0	0	None	g__Escherichia.s__Escherichia_coli	g__Escherichia	0.500428	1	g__Escherichia	K01487	0.522262	C00242	C00385	1	1	0	2
g__Escherichia.s__Escherichia_coli	C00242	-0.114083	0.99965	1	0.000349983	0.00195407	Guanine	0	1	Contrasting	Contrasting	0	1	2	1	2	Combination	Nucleotide	Purine metabolism, guanine containing	Guanine	7.11517	0.899017	0	0	None	g__Escherichia.s__Escherichia_coli	g__Escherichia	0.500428	1	g__Escherichia	K10213	0.901899	C00387	C00242	1	1	0	2
g__Escherichia.s__Escherichia_coli	C00253	-0.124374	0.99975	1	5e-05	0.000372204	Nicotinate	0	1	Contrasting	Contrasting	1	0	1	0	1	Synthesis	Cofactors and vitamins	Nicotinate and nicotinamide metabolism	Nicotinate	473.435	1.08e-08	1	0	Enriched	g__Escherichia.s__Escherichia_coli	g__Escherichia	0.585228	1	g__Escherichia	K08281	NA	C00153	C00253	1	1	0	1
g__Escherichia.s__Escherichia_coli	C00255	-0.144628	1	1	0.0001	0.000669967	Riboflavin	0	1	Contrasting	Contrasting	0	2	3	2	3	Combination	Cofactors and vitamins	Riboflavin metabolism	Riboflavin	24.5893	0.0139606	1	0	Enriched	g__Escherichia.s__Escherichia_coli	g__Escherichia	0.609202	1	g__Escherichia	K00484	0.882013	C00255	C01007	1	1	0	2
g__Escherichia.s__Escherichia_coli	C00255	-0.144628	1	1	0.0001	0.000669967	Riboflavin	0	1	Contrasting	Contrasting	0	2	3	2	3	Combination	Cofactors and vitamins	Riboflavin metabolism	Riboflavin	24.5893	0.0139606	1	0	Enriched	g__Escherichia.s__Escherichia_coli	g__Escherichia	0.609202	1	g__Escherichia	K01093	0.916454	C00061	C00255	1	1	0	2
g__Escherichia.s__Escherichia_coli	C00255	-0.144628	1	1	0.0001	0.000669967	Riboflavin	0	1	Contrasting	Contrasting	0	2	3	2	3	Combination	Cofactors and vitamins	Riboflavin metabolism	Riboflavin	24.5893	0.0139606	1	0	Enriched	g__Escherichia.s__Escherichia_coli	g__Escherichia	0.609202	1	g__Escherichia	K03788	0.849281	C00061	C00255	1	1	0	2
g__Escherichia.s__Escherichia_coli	C00270	-0.229038	1	1	5e-05	0.000372204	N-Acetylneuraminate	0	1	Contrasting	Contrasting	-1	1	1	1	0	Degradation	Carbohydrate	Aminosugars metabolism	N-Acetylneuraminate	652.995	0.544534	0	0	None	g__Escherichia.s__Escherichia_coli	g__Escherichia	0.727903	1	g__Escherichia	K01639	0.109466	C00270	C00645	1	1	0	1
g__Escherichia.s__Escherichia_coli	C00791	-0.117772	0.99975	1	0.000499975	0.00248136	Creatinine	0	1	Contrasting	Contrasting	-1	1	0	1	0	Degradation	Amino acid	Creatine metabolism	Creatinine	-1978.85	0.0132172	0	1	Depleted	g__Escherichia.s__Escherichia_coli	g__Escherichia	0.674072	1	g__Escherichia	K01485	NA	C00791	C02565	1	1	0	1
g__Eubacterium.s__Eubacterium_ventriosum	C00245	-0.112607	0.99965	1	0.000249988	0.00152265	Taurine	0	1	Contrasting	Contrasting	1	3	2	0	1	Synthesis	Amino acid	Cysteine, methionine, SAM, taurine metabolism	Taurine	-1796.62	1.33e-05	0	1	Depleted	g__Eubacterium.s__Eubacterium_ventriosum	g__Eubacterium	0.576319	1	g__Eubacterium	K01442	0.441061	C05122	C00245	1	1	0	1
g__Eubacterium.s__Eubacterium_ventriosum	C00245	-0.112607	0.99965	1	0.000249988	0.00152265	Taurine	0	1	Contrasting	Contrasting	1	3	2	0	1	Synthesis	Amino acid	Cysteine, methionine, SAM, taurine metabolism	Taurine	-1796.62	1.33e-05	0	1	Depleted	g__Eubacterium.s__Eubacterium_ventriosum	g__Eubacterium	0.576319	1	g__Eubacterium	K01442	0.441061	C05465	C00245	1	1	0	1
g__Eubacterium.s__Eubacterium_ventriosum	C00695	-0.199089	1	1	5e-05	0.000372204	Cholic acid	0	1	Contrasting	Contrasting	1	0	1	0	1	Synthesis	Lipid	Bile acid metabolism	Cholic acid	-2691.34	0.000115794	0	1	Depleted	g__Eubacterium.s__Eubacterium_ventriosum	g__Eubacterium	0.621881	1	g__Eubacterium	K01442	NA	C05122	C00695	1	1	0	1
g__Eubacterium.s__Eubacterium_ventriosum	C00695	-0.199089	1	1	5e-05	0.000372204	Cholic acid	0	1	Contrasting	Contrasting	1	0	1	0	1	Synthesis	Lipid	Bile acid metabolism	Cholic acid	-2691.34	0.000115794	0	1	Depleted	g__Eubacterium.s__Eubacterium_ventriosum	g__Eubacterium	0.621881	1	g__Eubacterium	K01442	NA	C01921	C00695	1	1	0	1
g__Faecalibacterium.s__Faecalibacterium_prausnitzii	C00245	-0.112607	0.99965	1	0.000249988	0.00152265	Taurine	0	1	Contrasting	Contrasting	1	3	2	0	1	Synthesis	Amino acid	Cysteine, methionine, SAM, taurine metabolism	Taurine	-1796.62	1.33e-05	0	1	Depleted	g__Faecalibacterium.s__Faecalibacterium_prausnitzii	g__Faecalibacterium	0.511519	1	g__Faecalibacterium	K01442	0.441061	C05122	C00245	1	1	0	1
g__Faecalibacterium.s__Faecalibacterium_prausnitzii	C00245	-0.112607	0.99965	1	0.000249988	0.00152265	Taurine	0	1	Contrasting	Contrasting	1	3	2	0	1	Synthesis	Amino acid	Cysteine, methionine, SAM, taurine metabolism	Taurine	-1796.62	1.33e-05	0	1	Depleted	g__Faecalibacterium.s__Faecalibacterium_prausnitzii	g__Faecalibacterium	0.511519	1	g__Faecalibacterium	K01442	0.441061	C05465	C00245	1	1	0	1
g__Faecalibacterium.s__Faecalibacterium_prausnitzii	C00695	-0.199089	1	1	5e-05	0.000372204	Cholic acid	0	1	Contrasting	Contrasting	1	0	1	0	1	Synthesis	Lipid	Bile acid metabolism	Cholic acid	-2691.34	0.000115794	0	1	Depleted	g__Faecalibacterium.s__Faecalibacterium_prausnitzii	g__Faecalibacterium	0.605395	1	g__Faecalibacterium	K01442	NA	C05122	C00695	1	1	0	1
g__Faecalibacterium.s__Faecalibacterium_prausnitzii	C00695	-0.199089	1	1	5e-05	0.000372204	Cholic acid	0	1	Contrasting	Contrasting	1	0	1	0	1	Synthesis	Lipid	Bile acid metabolism	Cholic acid	-2691.34	0.000115794	0	1	Depleted	g__Faecalibacterium.s__Faecalibacterium_prausnitzii	g__Faecalibacterium	0.605395	1	g__Faecalibacterium	K01442	NA	C01921	C00695	1	1	0	1
g__Haemophilus.s__Haemophilus_parainfluenzae	C00491	-0.295576	1	1	5e-05	0.000372204	L-Cystine	0	1	Contrasting	Contrasting	-1	4	0	4	0	Degradation	Amino acid	Cysteine, methionine, SAM, taurine metabolism	L-Cystine	22.5735	0.671575	0	0	None	g__Haemophilus.s__Haemophilus_parainfluenzae	g__Haemophilus	0.558074	1	g__Haemophilus	K01760	0.889664	C00491	C01962	1	1	0	2
g__Klebsiella.s__Klebsiella_pneumoniae	C00008	-0.171668	1	1	5e-05	0.000372204	ADP	0	1	Contrasting	Contrasting	0	4	1	1	1	Combination	NA	NA	ADP	-22.7371	1.47e-06	0	1	Depleted	g__Klebsiella.s__Klebsiella_pneumoniae	g__Klebsiella	0.608673	1	g__Klebsiella	K00526	0.425054	C00008	C00206	1	1	0	1
g__Klebsiella.s__Klebsiella_pneumoniae	C00008	-0.171668	1	1	5e-05	0.000372204	ADP	0	1	Contrasting	Contrasting	0	4	1	1	1	Combination	NA	NA	ADP	-22.7371	1.47e-06	0	1	Depleted	g__Klebsiella.s__Klebsiella_pneumoniae	g__Klebsiella	0.608673	1	g__Klebsiella	K01525	0.312235	C01260	C00008	1	2	0	1
g__Klebsiella.s__Klebsiella_pneumoniae	C00116	-0.149606	0.999	1	0.00119994	0.00554455	Glycerol	0	1	Contrasting	Contrasting	-1	3	0	1	0	Degradation	Lipid	Glycerolipid metabolism	Glycerol	375.786	0.000173919	1	0	Enriched	g__Klebsiella.s__Klebsiella_pneumoniae	g__Klebsiella	0.509251	1	g__Klebsiella	K00864	0.358081	C00116	C00093	1	1	0	1
g__Klebsiella.s__Klebsiella_pneumoniae	C00116	-0.149606	0.999	1	0.00119994	0.00554455	Glycerol	0	1	Contrasting	Contrasting	-1	3	0	1	0	Degradation	Lipid	Glycerolipid metabolism	Glycerol	375.786	0.000173919	1	0	Enriched	g__Klebsiella.s__Klebsiella_pneumoniae	g__Klebsiella	0.509251	1	g__Klebsiella	K06121	0.994764	C00116	C00969	1	1	0	0
g__Klebsiella.s__Klebsiella_pneumoniae	C00791	-0.117772	0.99975	1	0.000499975	0.00248136	Creatinine	0	1	Contrasting	Contrasting	-1	1	0	1	0	Degradation	Amino acid	Creatine metabolism	Creatinine	-1978.85	0.0132172	0	1	Depleted	g__Klebsiella.s__Klebsiella_pneumoniae	g__Klebsiella	0.742306	1	g__Klebsiella	K01485	NA	C00791	C02565	1	1	0	1
g__Lactobacillus.s__Lactobacillus_fermentum	C00051	-0.229868	1	1	5e-05	0.000372204	Glutathione	0	1	Contrasting	Contrasting	0	3	2	3	2	Combination	Amino acid	Glutathione metabolism	Glutathione	0.677628	0.295861	0	0	None	g__Lactobacillus.s__Lactobacillus_fermentum	g__Lactobacillus	0.50252	1	g__Lactobacillus	K00383	0.508261	C00005	C00051	1	2	0	2
g__Lactobacillus.s__Lactobacillus_fermentum	C00051	-0.229868	1	1	5e-05	0.000372204	Glutathione	0	1	Contrasting	Contrasting	0	3	2	3	2	Combination	Amino acid	Glutathione metabolism	Glutathione	0.677628	0.295861	0	0	None	g__Lactobacillus.s__Lactobacillus_fermentum	g__Lactobacillus	0.50252	1	g__Lactobacillus	K00383	0.508261	C00127	C00051	1	2	0	2
g__Lactobacillus.s__Lactobacillus_fermentum	C00242	-0.114083	0.99965	1	0.000349983	0.00195407	Guanine	0	1	Contrasting	Contrasting	0	1	2	1	2	Combination	Nucleotide	Purine metabolism, guanine containing	Guanine	7.11517	0.899017	0	0	None	g__Lactobacillus.s__Lactobacillus_fermentum	g__Lactobacillus	0.563514	1	g__Lactobacillus	K01239	0.882528	C00387	C00242	1	1	0	2
g__Lactobacillus.s__Lactobacillus_fermentum	C02679	-0.165035	1	1	5e-05	0.000372204	Dodecanoic acid	0	1	Contrasting	Contrasting	1	0	1	0	1	Synthesis	Lipid	Medium chain fatty acid	Dodecanoic acid	296.181	0.0138131	1	0	Enriched	g__Lactobacillus.s__Lactobacillus_fermentum	g__Lactobacillus	0.647753	1	g__Lactobacillus	K01071	NA	C05223	C02679	1	1	0	1
g__Lactobacillus.s__Lactobacillus_fermentum	C06423	-0.0966834	0.99775	1	0.00179991	0.0080396	Octanoic acid	0	1	Contrasting	Contrasting	1	0	1	0	1	Synthesis	Lipid	Medium chain fatty acid	Octanoic acid	-178.258	0.0237192	0	1	Depleted	g__Lactobacillus.s__Lactobacillus_fermentum	g__Lactobacillus	0.647753	1	g__Lactobacillus	K01071	NA	C05752	C06423	1	1	0	1
g__Megamonas.s__Megamonas_hypermegale	C00037	-0.145824	0.9999	1	0.0001	0.000669967	Glycine	0	1	Contrasting	Contrasting	0	14	9	14	9	Combination	Amino acid	Glycine, serine and threonine metabolism	Glycine	10295.1	0.0155731	1	0	Enriched	g__Megamonas.s__Megamonas_hypermegale	g__Megamonas	0.543908	1	g__Megamonas	K00282	0.998169	C00037	C00143	1	1	0	2
g__Megamonas.s__Megamonas_hypermegale	C00037	-0.145824	0.9999	1	0.0001	0.000669967	Glycine	0	1	Contrasting	Contrasting	0	14	9	14	9	Combination	Amino acid	Glycine, serine and threonine metabolism	Glycine	10295.1	0.0155731	1	0	Enriched	g__Megamonas.s__Megamonas_hypermegale	g__Megamonas	0.543908	1	g__Megamonas	K00282	0.998169	C00037	C01242	1	1	0	2
g__Megamonas.s__Megamonas_hypermegale	C00037	-0.145824	0.9999	1	0.0001	0.000669967	Glycine	0	1	Contrasting	Contrasting	0	14	9	14	9	Combination	Amino acid	Glycine, serine and threonine metabolism	Glycine	10295.1	0.0155731	1	0	Enriched	g__Megamonas.s__Megamonas_hypermegale	g__Megamonas	0.543908	1	g__Megamonas	K00283	0.998142	C00037	C00143	1	1	0	2
g__Megamonas.s__Megamonas_hypermegale	C00037	-0.145824	0.9999	1	0.0001	0.000669967	Glycine	0	1	Contrasting	Contrasting	0	14	9	14	9	Combination	Amino acid	Glycine, serine and threonine metabolism	Glycine	10295.1	0.0155731	1	0	Enriched	g__Megamonas.s__Megamonas_hypermegale	g__Megamonas	0.543908	1	g__Megamonas	K00283	0.998142	C00037	C01242	1	1	0	2
g__Megamonas.s__Megamonas_hypermegale	C00037	-0.145824	0.9999	1	0.0001	0.000669967	Glycine	0	1	Contrasting	Contrasting	0	14	9	14	9	Combination	Amino acid	Glycine, serine and threonine metabolism	Glycine	10295.1	0.0155731	1	0	Enriched	g__Megamonas.s__Megamonas_hypermegale	g__Megamonas	0.543908	1	g__Megamonas	K00382	0.923223	C00037	C00143	1	1	0	2
g__Megamonas.s__Megamonas_hypermegale	C00037	-0.145824	0.9999	1	0.0001	0.000669967	Glycine	0	1	Contrasting	Contrasting	0	14	9	14	9	Combination	Amino acid	Glycine, serine and threonine metabolism	Glycine	10295.1	0.0155731	1	0	Enriched	g__Megamonas.s__Megamonas_hypermegale	g__Megamonas	0.543908	1	g__Megamonas	K00600	0.967499	C00037	C00101	1	1	0	2
g__Megamonas.s__Megamonas_hypermegale	C00037	-0.145824	0.9999	1	0.0001	0.000669967	Glycine	0	1	Contrasting	Contrasting	0	14	9	14	9	Combination	Amino acid	Glycine, serine and threonine metabolism	Glycine	10295.1	0.0155731	1	0	Enriched	g__Megamonas.s__Megamonas_hypermegale	g__Megamonas	0.543908	1	g__Megamonas	K00605	0.967377	C00037	C00143	1	1	0	2
g__Megamonas.s__Megamonas_hypermegale	C00037	-0.145824	0.9999	1	0.0001	0.000669967	Glycine	0	1	Contrasting	Contrasting	0	14	9	14	9	Combination	Amino acid	Glycine, serine and threonine metabolism	Glycine	10295.1	0.0155731	1	0	Enriched	g__Megamonas.s__Megamonas_hypermegale	g__Megamonas	0.543908	1	g__Megamonas	K01270	0.724797	C01419	C00037	1	1	0	2
g__Megamonas.s__Megamonas_hypermegale	C00037	-0.145824	0.9999	1	0.0001	0.000669967	Glycine	0	1	Contrasting	Contrasting	0	14	9	14	9	Combination	Amino acid	Glycine, serine and threonine metabolism	Glycine	10295.1	0.0155731	1	0	Enriched	g__Megamonas.s__Megamonas_hypermegale	g__Megamonas	0.543908	1	g__Megamonas	K01270	0.724797	C05729	C00037	1	1	0	2
g__Megamonas.s__Megamonas_hypermegale	C00037	-0.145824	0.9999	1	0.0001	0.000669967	Glycine	0	1	Contrasting	Contrasting	0	14	9	14	9	Combination	Amino acid	Glycine, serine and threonine metabolism	Glycine	10295.1	0.0155731	1	0	Enriched	g__Megamonas.s__Megamonas_hypermegale	g__Megamonas	0.543908	1	g__Megamonas	K01878	0.967431	C00037	C02412	1	1	0	2
g__Megamonas.s__Megamonas_hypermegale	C00037	-0.145824	0.9999	1	0.0001	0.000669967	Glycine	0	1	Contrasting	Contrasting	0	14	9	14	9	Combination	Amino acid	Glycine, serine and threonine metabolism	Glycine	10295.1	0.0155731	1	0	Enriched	g__Megamonas.s__Megamonas_hypermegale	g__Megamonas	0.543908	1	g__Megamonas	K01879	0.994411	C00037	C02412	1	1	0	2
g__Megamonas.s__Megamonas_hypermegale	C00037	-0.145824	0.9999	1	0.0001	0.000669967	Glycine	0	1	Contrasting	Contrasting	0	14	9	14	9	Combination	Amino acid	Glycine, serine and threonine metabolism	Glycine	10295.1	0.0155731	1	0	Enriched	g__Megamonas.s__Megamonas_hypermegale	g__Megamonas	0.543908	1	g__Megamonas	K02437	0.963226	C00037	C00143	1	1	0	2
g__Methanobrevibacter.s__Methanobrevibacter_smithii	C00483	-0.120224	0.999	1	0.000949953	0.0045462	Tyramine	0	1	Contrasting	Contrasting	-1	3	0	1	0	Degradation	Amino acid	Phenylalanine & tyrosine metabolism	Tyramine	535.542	0.0529199	1	0	Enriched	g__Methanobrevibacter.s__Methanobrevibacter_smithii	g__Methanobrevibacter	0.988242	1	g__Methanobrevibacter	K06914	0.445435	C00483	C20926	1	1	0	1
g__Parabacteroides.s__Parabacteroides_distasonis	C00242	-0.114083	0.99965	1	0.000349983	0.00195407	Guanine	0	1	Contrasting	Contrasting	0	1	2	1	2	Combination	Nucleotide	Purine metabolism, guanine containing	Guanine	7.11517	0.899017	0	0	None	g__Parabacteroides.s__Parabacteroides_distasonis	g__Parabacteroides	0.518381	1	g__Parabacteroides	K01487	0.522262	C00242	C00385	1	1	0	2
g__Roseburia.s__Roseburia_hominis	C00695	-0.199089	1	1	5e-05	0.000372204	Cholic acid	0	1	Contrasting	Contrasting	1	0	1	0	1	Synthesis	Lipid	Bile acid metabolism	Cholic acid	-2691.34	0.000115794	0	1	Depleted	g__Roseburia.s__Roseburia_hominis	g__Roseburia	0.503616	1	g__Roseburia	K01442	NA	C05122	C00695	1	1	0	1
g__Roseburia.s__Roseburia_hominis	C00695	-0.199089	1	1	5e-05	0.000372204	Cholic acid	0	1	Contrasting	Contrasting	1	0	1	0	1	Synthesis	Lipid	Bile acid metabolism	Cholic acid	-2691.34	0.000115794	0	1	Depleted	g__Roseburia.s__Roseburia_hominis	g__Roseburia	0.503616	1	g__Roseburia	K01442	NA	C01921	C00695	1	1	0	1
g__Roseburia.s__Roseburia_intestinalis	C00245	-0.112607	0.99965	1	0.000249988	0.00152265	Taurine	0	1	Contrasting	Contrasting	1	3	2	0	1	Synthesis	Amino acid	Cysteine, methionine, SAM, taurine metabolism	Taurine	-1796.62	1.33e-05	0	1	Depleted	g__Roseburia.s__Roseburia_intestinalis	g__Roseburia	0.581689	1	g__Roseburia	K01442	0.441061	C05122	C00245	1	1	0	1
g__Roseburia.s__Roseburia_intestinalis	C00245	-0.112607	0.99965	1	0.000249988	0.00152265	Taurine	0	1	Contrasting	Contrasting	1	3	2	0	1	Synthesis	Amino acid	Cysteine, methionine, SAM, taurine metabolism	Taurine	-1796.62	1.33e-05	0	1	Depleted	g__Roseburia.s__Roseburia_intestinalis	g__Roseburia	0.581689	1	g__Roseburia	K01442	0.441061	C05465	C00245	1	1	0	1
g__Roseburia.s__Roseburia_intestinalis	C00695	-0.199089	1	1	5e-05	0.000372204	Cholic acid	0	1	Contrasting	Contrasting	1	0	1	0	1	Synthesis	Lipid	Bile acid metabolism	Cholic acid	-2691.34	0.000115794	0	1	Depleted	g__Roseburia.s__Roseburia_intestinalis	g__Roseburia	0.627156	1	g__Roseburia	K01442	NA	C05122	C00695	1	1	0	1
g__Roseburia.s__Roseburia_intestinalis	C00695	-0.199089	1	1	5e-05	0.000372204	Cholic acid	0	1	Contrasting	Contrasting	1	0	1	0	1	Synthesis	Lipid	Bile acid metabolism	Cholic acid	-2691.34	0.000115794	0	1	Depleted	g__Roseburia.s__Roseburia_intestinalis	g__Roseburia	0.627156	1	g__Roseburia	K01442	NA	C01921	C00695	1	1	0	1
g__Roseburia.s__Roseburia_inulinivorans	C00695	-0.199089	1	1	5e-05	0.000372204	Cholic acid	0	1	Contrasting	Contrasting	1	0	1	0	1	Synthesis	Lipid	Bile acid metabolism	Cholic acid	-2691.34	0.000115794	0	1	Depleted	g__Roseburia.s__Roseburia_inulinivorans	g__Roseburia	0.56134	1	g__Roseburia	K01442	NA	C05122	C00695	1	1	0	1
g__Roseburia.s__Roseburia_inulinivorans	C00695	-0.199089	1	1	5e-05	0.000372204	Cholic acid	0	1	Contrasting	Contrasting	1	0	1	0	1	Synthesis	Lipid	Bile acid metabolism	Cholic acid	-2691.34	0.000115794	0	1	Depleted	g__Roseburia.s__Roseburia_inulinivorans	g__Roseburia	0.56134	1	g__Roseburia	K01442	NA	C01921	C00695	1	1	0	1
g__Streptococcus.s__Streptococcus_lutetiensis	C00051	-0.229868	1	1	5e-05	0.000372204	Glutathione	0	1	Contrasting	Contrasting	0	3	2	3	2	Combination	Amino acid	Glutathione metabolism	Glutathione	0.677628	0.295861	0	0	None	g__Streptococcus.s__Streptococcus_lutetiensis	g__Streptococcus	0.629338	1	g__Streptococcus	K00383	0.508261	C00005	C00051	1	2	0	2
g__Streptococcus.s__Streptococcus_lutetiensis	C00051	-0.229868	1	1	5e-05	0.000372204	Glutathione	0	1	Contrasting	Contrasting	0	3	2	3	2	Combination	Amino acid	Glutathione metabolism	Glutathione	0.677628	0.295861	0	0	None	g__Streptococcus.s__Streptococcus_lutetiensis	g__Streptococcus	0.629338	1	g__Streptococcus	K00383	0.508261	C00127	C00051	1	2	0	2
g__Streptococcus.s__Streptococcus_lutetiensis	C00051	-0.229868	1	1	5e-05	0.000372204	Glutathione	0	1	Contrasting	Contrasting	0	3	2	3	2	Combination	Amino acid	Glutathione metabolism	Glutathione	0.677628	0.295861	0	0	None	g__Streptococcus.s__Streptococcus_lutetiensis	g__Streptococcus	0.629338	1	g__Streptococcus	K00432	0.684848	C00051	C00127	2	1	0	2
g__Streptococcus.s__Streptococcus_lutetiensis	C02679	-0.165035	1	1	5e-05	0.000372204	Dodecanoic acid	0	1	Contrasting	Contrasting	1	0	1	0	1	Synthesis	Lipid	Medium chain fatty acid	Dodecanoic acid	296.181	0.0138131	1	0	Enriched	g__Streptococcus.s__Streptococcus_lutetiensis	g__Streptococcus	0.760497	1	g__Streptococcus	K01071	NA	C05223	C02679	1	1	0	1
g__Streptococcus.s__Streptococcus_lutetiensis	C06423	-0.0966834	0.99775	1	0.00179991	0.0080396	Octanoic acid	0	1	Contrasting	Contrasting	1	0	1	0	1	Synthesis	Lipid	Medium chain fatty acid	Octanoic acid	-178.258	0.0237192	0	1	Depleted	g__Streptococcus.s__Streptococcus_lutetiensis	g__Streptococcus	0.760497	1	g__Streptococcus	K01071	NA	C05752	C06423	1	1	0	1
g__Veillonella.s__Veillonella_dispar	C00491	-0.295576	1	1	5e-05	0.000372204	L-Cystine	0	1	Contrasting	Contrasting	-1	4	0	4	0	Degradation	Amino acid	Cysteine, methionine, SAM, taurine metabolism	L-Cystine	22.5735	0.671575	0	0	None	g__Veillonella.s__Veillonella_dispar	g__Veillonella	0.526683	1	g__Veillonella	K01760	0.889664	C00491	C01962	1	1	0	2
g__Veillonella.s__Veillonella_dispar	C00491	-0.295576	1	1	5e-05	0.000372204	L-Cystine	0	1	Contrasting	Contrasting	-1	4	0	4	0	Degradation	Amino acid	Cysteine, methionine, SAM, taurine metabolism	L-Cystine	22.5735	0.671575	0	0	None	g__Veillonella.s__Veillonella_dispar	g__Veillonella	0.526683	1	g__Veillonella	K14155	0.834509	C00491	C01962	1	1	0	2
g__Veillonella.s__Veillonella_parvula	C00491	-0.295576	1	1	5e-05	0.000372204	L-Cystine	0	1	Contrasting	Contrasting	-1	4	0	4	0	Degradation	Amino acid	Cysteine, methionine, SAM, taurine metabolism	L-Cystine	22.5735	0.671575	0	0	None	g__Veillonella.s__Veillonella_parvula	g__Veillonella	0.553793	1	g__Veillonella	K01760	0.889664	C00491	C01962	1	1	0	2
g__Veillonella.s__Veillonella_parvula	C00491	-0.295576	1	1	5e-05	0.000372204	L-Cystine	0	1	Contrasting	Contrasting	-1	4	0	4	0	Degradation	Amino acid	Cysteine, methionine, SAM, taurine metabolism	L-Cystine	22.5735	0.671575	0	0	None	g__Veillonella.s__Veillonella_parvula	g__Veillonella	0.553793	1	g__Veillonella	K14155	0.834509	C00491	C01962	1	1	0	2
unclassified	C00253	-0.124374	0.99975	1	5e-05	0.000372204	Nicotinate	0	1	Contrasting	Contrasting	1	0	1	0	1	Synthesis	Cofactors and vitamins	Nicotinate and nicotinamide metabolism	Nicotinate	473.435	1.08e-08	1	0	Enriched	unclassified	unclassified	0.633156	1	unclassified	K08281	NA	C00153	C00253	1	1	0	1
g__Atopobium.s__Atopobium_parvulum	C00064	-0.0294123	0.80611	1	0.19959	0.486274	L-Glutamine	0	0	Inconsistent	Inconsistent	-1	5	0	5	0	Degradation	Amino acid	Glutamate metabolism	L-Glutamine	-120.158	0.0481929	0	1	Depleted	g__Atopobium.s__Atopobium_parvulum	g__Atopobium	0.503952	1	g__Atopobium	K00764	0.965518	C00064	C03090	1	1	0	2
g__Atopobium.s__Atopobium_parvulum	C00064	-0.0294123	0.80611	1	0.19959	0.486274	L-Glutamine	0	0	Inconsistent	Inconsistent	-1	5	0	5	0	Degradation	Amino acid	Glutamate metabolism	L-Glutamine	-120.158	0.0481929	0	1	Depleted	g__Atopobium.s__Atopobium_parvulum	g__Atopobium	0.503952	1	g__Atopobium	K00820	0.978025	C00064	C00352	1	1	0	2
g__Atopobium.s__Atopobium_parvulum	C00064	-0.0294123	0.80611	1	0.19959	0.486274	L-Glutamine	0	0	Inconsistent	Inconsistent	-1	5	0	5	0	Degradation	Amino acid	Glutamate metabolism	L-Glutamine	-120.158	0.0481929	0	1	Depleted	g__Atopobium.s__Atopobium_parvulum	g__Atopobium	0.503952	1	g__Atopobium	K01956	0.982515	C00064	C00169	1	1	0	2
g__Atopobium.s__Atopobium_parvulum	C00065	-0.012701	0.647218	1	0.354082	0.765275	L-Serine	0	0	Inconsistent	Inconsistent	-1	8	0	8	0	Degradation	Amino acid	Glycine, serine and threonine metabolism	L-Serine	795.899	0.0732937	1	0	Enriched	g__Atopobium.s__Atopobium_parvulum	g__Atopobium	0.524533	1	g__Atopobium	K01752	0.964284	C00065	C02218	1	1	0	2
g__Atopobium.s__Atopobium_parvulum	C00065	-0.012701	0.647218	1	0.354082	0.765275	L-Serine	0	0	Inconsistent	Inconsistent	-1	8	0	8	0	Degradation	Amino acid	Glycine, serine and threonine metabolism	L-Serine	795.899	0.0732937	1	0	Enriched	g__Atopobium.s__Atopobium_parvulum	g__Atopobium	0.524533	1	g__Atopobium	K01875	0.926886	C00065	C02553	1	1	0	2
g__Atopobium.s__Atopobium_parvulum	C00065	-0.012701	0.647218	1	0.354082	0.765275	L-Serine	0	0	Inconsistent	Inconsistent	-1	8	0	8	0	Degradation	Amino acid	Glycine, serine and threonine metabolism	L-Serine	795.899	0.0732937	1	0	Enriched	g__Atopobium.s__Atopobium_parvulum	g__Atopobium	0.524533	1	g__Atopobium	K01875	0.926886	C00065	C06481	1	1	0	2
g__Bacteroides.s__Bacteroides_fragilis	C00881	-0.0527923	0.936753	1	0.0625969	0.195069	Deoxycytidine	0	0	Inconsistent	Inconsistent	-1	2	6	1	0	Degradation	Nucleotide	Pyrimidine metabolism cytidine containing	Deoxycytidine	-2.38313	0.00953377	0	1	Depleted	g__Bacteroides.s__Bacteroides_fragilis	g__Bacteroides	0.507439	1	g__Bacteroides	K01081	0.906253	C00239	C00881	1	1	0	0
g__Bacteroides.s__Bacteroides_fragilis	C00881	-0.0527923	0.936753	1	0.0625969	0.195069	Deoxycytidine	0	0	Inconsistent	Inconsistent	-1	2	6	1	0	Degradation	Nucleotide	Pyrimidine metabolism cytidine containing	Deoxycytidine	-2.38313	0.00953377	0	1	Depleted	g__Bacteroides.s__Bacteroides_fragilis	g__Bacteroides	0.507439	1	g__Bacteroides	K03787	0.783532	C00239	C00881	1	1	0	0
g__Bacteroides.s__Bacteroides_ovatus	C00378	-0.0752363	0.970051	1	0.0299985	0.0957095	Thiamine	0	0	Inconsistent	Contrasting	0	4	2	4	2	Combination	NA	NA	Thiamine	-1282.53	0.88332	0	0	None	g__Bacteroides.s__Bacteroides_ovatus	g__Bacteroides	0.507428	1	g__Bacteroides	K01077	0.93223	C01081	C00378	1	1	0	2
g__Bacteroides.s__Bacteroides_ovatus	C00378	-0.0752363	0.970051	1	0.0299985	0.0957095	Thiamine	0	0	Inconsistent	Contrasting	0	4	2	4	2	Combination	NA	NA	Thiamine	-1282.53	0.88332	0	0	None	g__Bacteroides.s__Bacteroides_ovatus	g__Bacteroides	0.507428	1	g__Bacteroides	K06949	0.762588	C01081	C00378	1	1	0	2
g__Bacteroides.s__Bacteroides_uniformis	C03375	-0.0706711	0.99225	1	0.00714964	0.0273729	Norspermidine	0	0	Inconsistent	Contrasting	1	0	1	0	1	Synthesis	NA	NA	Norspermidine	0.0594412	0.295861	0	0	None	g__Bacteroides.s__Bacteroides_uniformis	g__Bacteroides	0.567883	1	g__Bacteroides	K13747	NA	C18174	C03375	1	1	0	1
g__Bacteroides.s__Bacteroides_uniformis	C03722	0.0593868	0.020799	0.0633423	0.978801	1	Quinolinate	0	0	Inconsistent	Consistent	1	1	1	0	1	Synthesis	NA	NA	Quinolinate	-13.8316	0.261831	0	0	None	g__Bacteroides.s__Bacteroides_uniformis	g__Bacteroides	0.648519	1	g__Bacteroides	K03517	0.404775	C00111	C03722	1	1	0	1
g__Bacteroides.s__Bacteroides_uniformis	C03722	0.0593868	0.020799	0.0633423	0.978801	1	Quinolinate	0	0	Inconsistent	Consistent	1	1	1	0	1	Synthesis	NA	NA	Quinolinate	-13.8316	0.261831	0	0	None	g__Bacteroides.s__Bacteroides_uniformis	g__Bacteroides	0.648519	1	g__Bacteroides	K03517	0.404775	C05840	C03722	1	1	0	1
g__Bacteroides.s__Bacteroides_vulgatus	C00021	0.0495016	0.0369982	0.110172	0.964202	1	S-Adenosyl-L-homocysteine	0	0	Inconsistent	Inconsistent	-1	3	5	1	0	Degradation	NA	NA	S-Adenosyl-L-homocysteine	0.588283	0.640877	0	0	None	g__Bacteroides.s__Bacteroides_vulgatus	g__Bacteroides	0.511047	1	g__Bacteroides	K01243	0.482366	C00021	C03539	1	1	0	1
g__Bacteroides.s__Bacteroides_vulgatus	C00043	0.0625708	0.0507975	0.14181	0.949553	1	UDP-N-acetyl-alpha-D-glucosamine	0	0	Inconsistent	Inconsistent	-1	7	0	7	0	Degradation	NA	NA	UDP-N-acetyl-alpha-D-glucosamine	-59.6682	1.42e-08	0	1	Depleted	g__Bacteroides.s__Bacteroides_vulgatus	g__Bacteroides	0.540361	1	g__Bacteroides	K00677	0.949064	C00043	C04738	1	1	0	2
g__Bacteroides.s__Bacteroides_vulgatus	C00043	0.0625708	0.0507975	0.14181	0.949553	1	UDP-N-acetyl-alpha-D-glucosamine	0	0	Inconsistent	Inconsistent	-1	7	0	7	0	Degradation	NA	NA	UDP-N-acetyl-alpha-D-glucosamine	-59.6682	1.42e-08	0	1	Depleted	g__Bacteroides.s__Bacteroides_vulgatus	g__Bacteroides	0.540361	1	g__Bacteroides	K00790	0.957135	C00043	C04631	1	1	0	2
g__Bacteroides.s__Bacteroides_vulgatus	C00043	0.0625708	0.0507975	0.14181	0.949553	1	UDP-N-acetyl-alpha-D-glucosamine	0	0	Inconsistent	Inconsistent	-1	7	0	7	0	Degradation	NA	NA	UDP-N-acetyl-alpha-D-glucosamine	-59.6682	1.42e-08	0	1	Depleted	g__Bacteroides.s__Bacteroides_vulgatus	g__Bacteroides	0.540361	1	g__Bacteroides	K01791	0.975515	C00043	C01170	1	1	0	2
g__Bacteroides.s__Bacteroides_vulgatus	C00123	-0.0198284	0.700065	1	0.301085	0.707814	L-Leucine	0	0	Inconsistent	Inconsistent	-1	1	0	1	0	Degradation	Amino acid	Valine, leucine and isoleucine metabolism	L-Leucine	4649.59	0.00401878	1	0	Enriched	g__Bacteroides.s__Bacteroides_vulgatus	g__Bacteroides	0.972564	1	g__Bacteroides	K01869	NA	C00123	C02047	1	1	0	1
g__Bacteroides.s__Bacteroides_vulgatus	C00134	-0.0856282	0.9938	1	0.00694965	0.0273729	Putrescine	0	0	Inconsistent	Contrasting	1	4	2	0	1	Synthesis	Amino acid	Polyamine metabolism	Putrescine	-16.5416	0.316951	0	0	None	g__Bacteroides.s__Bacteroides_vulgatus	g__Bacteroides	0.632439	1	g__Bacteroides	K12251	0.460689	C00436	C00134	1	1	0	1
g__Bacteroides.s__Bacteroides_vulgatus	C00140	-0.0326361	0.823109	1	0.178291	0.442426	N-Acetyl-D-glucosamine	0	0	Inconsistent	Inconsistent	0	5	5	5	5	Combination	Carbohydrate	Aminosugars metabolism	N-Acetyl-D-glucosamine	3612.91	1.53e-05	1	0	Enriched	g__Bacteroides.s__Bacteroides_vulgatus	g__Bacteroides	0.583468	1	g__Bacteroides	K01183	0.986245	C00461	C00140	1	1	0	2
g__Bacteroides.s__Bacteroides_vulgatus	C00140	-0.0326361	0.823109	1	0.178291	0.442426	N-Acetyl-D-glucosamine	0	0	Inconsistent	Inconsistent	0	5	5	5	5	Combination	Carbohydrate	Aminosugars metabolism	N-Acetyl-D-glucosamine	3612.91	1.53e-05	1	0	Enriched	g__Bacteroides.s__Bacteroides_vulgatus	g__Bacteroides	0.583468	1	g__Bacteroides	K12373	0.769072	C01674	C00140	1	2	0	2
g__Bacteroides.s__Bacteroides_vulgatus	C00378	-0.0752363	0.970051	1	0.0299985	0.0957095	Thiamine	0	0	Inconsistent	Contrasting	0	4	2	4	2	Combination	NA	NA	Thiamine	-1282.53	0.88332	0	0	None	g__Bacteroides.s__Bacteroides_vulgatus	g__Bacteroides	0.610844	1	g__Bacteroides	K01077	0.93223	C01081	C00378	1	1	0	2
g__Bacteroides.s__Bacteroides_vulgatus	C00378	-0.0752363	0.970051	1	0.0299985	0.0957095	Thiamine	0	0	Inconsistent	Contrasting	0	4	2	4	2	Combination	NA	NA	Thiamine	-1282.53	0.88332	0	0	None	g__Bacteroides.s__Bacteroides_vulgatus	g__Bacteroides	0.610844	1	g__Bacteroides	K06949	0.762588	C01081	C00378	1	1	0	2
g__Bifidobacterium.s__Bifidobacterium_bifidum	C00099	-0.0453774	0.873806	1	0.130493	0.349723	beta-Alanine	0	0	Inconsistent	Inconsistent	1	1	1	0	1	Synthesis	Amino acid	Alanine and aspartate metabolism	beta-Alanine	-92.0317	0.810306	0	0	None	g__Bifidobacterium.s__Bifidobacterium_bifidum	g__Bifidobacterium	0.56022	1	g__Bifidobacterium	K00128	-0.100357	C05665	C00099	1	1	0	1
g__Bifidobacterium.s__Bifidobacterium_bifidum	C00568	-0.0269225	0.779711	1	0.219289	0.524727	4-Aminobenzoate	0	0	Inconsistent	Inconsistent	0	3	2	1	1	Combination	NA	NA	4-Aminobenzoate	0.347056	0.718126	0	0	None	g__Bifidobacterium.s__Bifidobacterium_bifidum	g__Bifidobacterium	0.565522	1	g__Bifidobacterium	K00796	0.242878	C00568	C00921	1	1	0	1
g__Bifidobacterium.s__Bifidobacterium_bifidum	C00954	-0.0058804	0.556422	1	0.443128	0.915174	Indole-3-acetate	0	0	Inconsistent	Inconsistent	1	0	3	0	3	Synthesis	Amino acid	Tryptophan metabolism	Indole-3-acetate	99.861	0.0687637	1	0	Enriched	g__Bifidobacterium.s__Bifidobacterium_bifidum	g__Bifidobacterium	0.509491	1	g__Bifidobacterium	K00128	0.615286	C00637	C00954	1	1	0	2
g__Bifidobacterium.s__Bifidobacterium_bifidum	C01118	-0.04811	0.923004	1	0.0729464	0.222155	O-Succinyl-L-homoserine	0	0	Inconsistent	Inconsistent	-1	2	0	1	0	Degradation	Amino acid	Glycine, serine and threonine metabolism	O-Succinyl-L-homoserine	-32.0101	5.89e-06	0	1	Depleted	g__Bifidobacterium.s__Bifidobacterium_bifidum	g__Bifidobacterium	0.532391	1	g__Bifidobacterium	K01739	0.146244	C01118	C00109	1	1	0	1
g__Bifidobacterium.s__Bifidobacterium_bifidum	C01118	-0.04811	0.923004	1	0.0729464	0.222155	O-Succinyl-L-homoserine	0	0	Inconsistent	Inconsistent	-1	2	0	1	0	Degradation	Amino acid	Glycine, serine and threonine metabolism	O-Succinyl-L-homoserine	-32.0101	5.89e-06	0	1	Depleted	g__Bifidobacterium.s__Bifidobacterium_bifidum	g__Bifidobacterium	0.532391	1	g__Bifidobacterium	K01739	0.146244	C01118	C00155	1	1	0	1
g__Bifidobacterium.s__Bifidobacterium_bifidum	C01181	-0.0130016	0.649068	1	0.350532	0.765275	4-Trimethylammoniobutanoate	0	0	Inconsistent	Inconsistent	1	0	1	0	1	Synthesis	Lipid	Carnitine metabolism	4-Trimethylammoniobutanoate	-486.146	0.0149519	0	1	Depleted	g__Bifidobacterium.s__Bifidobacterium_bifidum	g__Bifidobacterium	0.56005	1	g__Bifidobacterium	K00128	NA	C01149	C01181	1	1	0	1
g__Bifidobacterium.s__Bifidobacterium_bifidum	C05635	-0.0381454	0.845108	1	0.157242	0.405845	5-Hydroxyindoleacetate	0	0	Inconsistent	Inconsistent	1	0	1	0	1	Synthesis	NA	NA	5-Hydroxyindoleacetate	-18.8648	0.952671	0	0	None	g__Bifidobacterium.s__Bifidobacterium_bifidum	g__Bifidobacterium	0.56005	1	g__Bifidobacterium	K00128	NA	C05634	C05635	1	1	0	1
g__Bifidobacterium.s__Bifidobacterium_dentium	C00064	-0.0294123	0.80611	1	0.19959	0.486274	L-Glutamine	0	0	Inconsistent	Inconsistent	-1	5	0	5	0	Degradation	Amino acid	Glutamate metabolism	L-Glutamine	-120.158	0.0481929	0	1	Depleted	g__Bifidobacterium.s__Bifidobacterium_dentium	g__Bifidobacterium	0.632629	1	g__Bifidobacterium	K00764	0.965518	C00064	C03090	1	1	0	2
g__Bifidobacterium.s__Bifidobacterium_dentium	C00064	-0.0294123	0.80611	1	0.19959	0.486274	L-Glutamine	0	0	Inconsistent	Inconsistent	-1	5	0	5	0	Degradation	Amino acid	Glutamate metabolism	L-Glutamine	-120.158	0.0481929	0	1	Depleted	g__Bifidobacterium.s__Bifidobacterium_dentium	g__Bifidobacterium	0.632629	1	g__Bifidobacterium	K01956	0.982515	C00064	C00169	1	1	0	2
g__Bifidobacterium.s__Bifidobacterium_dentium	C00065	-0.012701	0.647218	1	0.354082	0.765275	L-Serine	0	0	Inconsistent	Inconsistent	-1	8	0	8	0	Degradation	Amino acid	Glycine, serine and threonine metabolism	L-Serine	795.899	0.0732937	1	0	Enriched	g__Bifidobacterium.s__Bifidobacterium_dentium	g__Bifidobacterium	0.565263	1	g__Bifidobacterium	K01695	0.994262	C00065	C00078	1	1	0	2
g__Bifidobacterium.s__Bifidobacterium_dentium	C00065	-0.012701	0.647218	1	0.354082	0.765275	L-Serine	0	0	Inconsistent	Inconsistent	-1	8	0	8	0	Degradation	Amino acid	Glycine, serine and threonine metabolism	L-Serine	795.899	0.0732937	1	0	Enriched	g__Bifidobacterium.s__Bifidobacterium_dentium	g__Bifidobacterium	0.565263	1	g__Bifidobacterium	K01752	0.964284	C00065	C02218	1	1	0	2
g__Bifidobacterium.s__Bifidobacterium_dentium	C00065	-0.012701	0.647218	1	0.354082	0.765275	L-Serine	0	0	Inconsistent	Inconsistent	-1	8	0	8	0	Degradation	Amino acid	Glycine, serine and threonine metabolism	L-Serine	795.899	0.0732937	1	0	Enriched	g__Bifidobacterium.s__Bifidobacterium_dentium	g__Bifidobacterium	0.565263	1	g__Bifidobacterium	K01875	0.926886	C00065	C02553	1	1	0	2
g__Bifidobacterium.s__Bifidobacterium_dentium	C00065	-0.012701	0.647218	1	0.354082	0.765275	L-Serine	0	0	Inconsistent	Inconsistent	-1	8	0	8	0	Degradation	Amino acid	Glycine, serine and threonine metabolism	L-Serine	795.899	0.0732937	1	0	Enriched	g__Bifidobacterium.s__Bifidobacterium_dentium	g__Bifidobacterium	0.565263	1	g__Bifidobacterium	K01875	0.926886	C00065	C06481	1	1	0	2
g__Bifidobacterium.s__Bifidobacterium_longum	C00099	-0.0453774	0.873806	1	0.130493	0.349723	beta-Alanine	0	0	Inconsistent	Inconsistent	1	1	1	0	1	Synthesis	Amino acid	Alanine and aspartate metabolism	beta-Alanine	-92.0317	0.810306	0	0	None	g__Bifidobacterium.s__Bifidobacterium_longum	g__Bifidobacterium	0.774209	1	g__Bifidobacterium	K00128	-0.100357	C05665	C00099	1	1	0	1
g__Bifidobacterium.s__Bifidobacterium_longum	C00120	0.0917802	0.00459977	0.0166586	0.9951	1	Biotin	0	0	Inconsistent	Consistent	-1	2	2	1	0	Degradation	NA	NA	Biotin	-4.80275	0.0643868	0	1	Depleted	g__Bifidobacterium.s__Bifidobacterium_longum	g__Bifidobacterium	0.63125	1	g__Bifidobacterium	K03524	0.143218	C00120	C05921	1	1	0	1
g__Bifidobacterium.s__Bifidobacterium_longum	C00153	-0.0693261	0.977201	1	0.0239988	0.080396	Nicotinamide	0	0	Inconsistent	Contrasting	-1	1	2	1	0	Degradation	Cofactors and vitamins	Nicotinate and nicotinamide metabolism	Nicotinamide	-20.9079	0.00106797	0	1	Depleted	g__Bifidobacterium.s__Bifidobacterium_longum	g__Bifidobacterium	0.620633	1	g__Bifidobacterium	K01239	0.793179	C03150	C00153	1	1	0	0
g__Bifidobacterium.s__Bifidobacterium_longum	C00153	-0.0693261	0.977201	1	0.0239988	0.080396	Nicotinamide	0	0	Inconsistent	Contrasting	-1	1	2	1	0	Degradation	Cofactors and vitamins	Nicotinate and nicotinamide metabolism	Nicotinamide	-20.9079	0.00106797	0	1	Depleted	g__Bifidobacterium.s__Bifidobacterium_longum	g__Bifidobacterium	0.620633	1	g__Bifidobacterium	K08281	0.128216	C00153	C00253	1	1	0	1
g__Bifidobacterium.s__Bifidobacterium_longum	C00191	-0.0904289	0.984951	1	0.0155492	0.0548315	D-Glucuronate	0	0	Inconsistent	Contrasting	1	0	1	0	1	Synthesis	Carbohydrate	Glycolysis gluconeogenesis pyruvate metabolism	D-Glucuronate	27.068	0.140437	0	0	None	g__Bifidobacterium.s__Bifidobacterium_longum	g__Bifidobacterium	0.834591	1	g__Bifidobacterium	K01195	NA	C03033	C00191	1	1	0	1
g__Bifidobacterium.s__Bifidobacterium_longum	C00330	-0.000987543	0.519524	1	0.487526	0.975051	Deoxyguanosine	0	0	Inconsistent	Inconsistent	1	0	1	0	1	Synthesis	Nucleotide	Purine metabolism guanine containing	Deoxyguanosine	3.5866	0.222013	0	0	None	g__Bifidobacterium.s__Bifidobacterium_longum	g__Bifidobacterium	0.52802	1	g__Bifidobacterium	K01129	NA	C00286	C00330	1	1	0	1
g__Bifidobacterium.s__Bifidobacterium_longum	C00954	-0.0058804	0.556422	1	0.443128	0.915174	Indole-3-acetate	0	0	Inconsistent	Inconsistent	1	0	3	0	3	Synthesis	Amino acid	Tryptophan metabolism	Indole-3-acetate	99.861	0.0687637	1	0	Enriched	g__Bifidobacterium.s__Bifidobacterium_longum	g__Bifidobacterium	0.84457	1	g__Bifidobacterium	K00128	0.615286	C00637	C00954	1	1	0	2
g__Bifidobacterium.s__Bifidobacterium_longum	C00954	-0.0058804	0.556422	1	0.443128	0.915174	Indole-3-acetate	0	0	Inconsistent	Inconsistent	1	0	3	0	3	Synthesis	Amino acid	Tryptophan metabolism	Indole-3-acetate	99.861	0.0687637	1	0	Enriched	g__Bifidobacterium.s__Bifidobacterium_longum	g__Bifidobacterium	0.84457	1	g__Bifidobacterium	K01426	0.957216	C02693	C00954	1	1	0	2
g__Bifidobacterium.s__Bifidobacterium_longum	C01035	-0.0181804	0.698365	1	0.311884	0.720561	4-Guanidinobutanoate	0	0	Inconsistent	Inconsistent	1	0	2	0	2	Synthesis	Amino acid	Guanidino and acetamido metabolism	4-Guanidinobutanoate	-2.52011	0.0295297	0	1	Depleted	g__Bifidobacterium.s__Bifidobacterium_longum	g__Bifidobacterium	0.791541	1	g__Bifidobacterium	K01426	0.598602	C03078	C01035	1	1	0	2
g__Bifidobacterium.s__Bifidobacterium_longum	C01181	-0.0130016	0.649068	1	0.350532	0.765275	4-Trimethylammoniobutanoate	0	0	Inconsistent	Inconsistent	1	0	1	0	1	Synthesis	Lipid	Carnitine metabolism	4-Trimethylammoniobutanoate	-486.146	0.0149519	0	1	Depleted	g__Bifidobacterium.s__Bifidobacterium_longum	g__Bifidobacterium	0.773822	1	g__Bifidobacterium	K00128	NA	C01149	C01181	1	1	0	1
g__Bifidobacterium.s__Bifidobacterium_longum	C02693	-0.00462171	0.552022	1	0.443928	0.915174	(Indol-3-yl)acetamide	0	0	Inconsistent	Inconsistent	-1	1	1	1	0	Degradation	NA	NA	(Indol-3-yl)acetamide	24.8316	0.550311	0	0	None	g__Bifidobacterium.s__Bifidobacterium_longum	g__Bifidobacterium	0.818737	1	g__Bifidobacterium	K01426	0.212504	C02693	C00954	1	1	0	1
g__Bifidobacterium.s__Bifidobacterium_longum	C04294	0.0936467	0.00624969	0.0214733	0.9947	1	5-(2-Hydroxyethyl)-4-methylthiazole	0	0	Inconsistent	Consistent	-1	1	2	1	0	Degradation	NA	NA	5-(2-Hydroxyethyl)-4-methylthiazole	0.80999	0.837944	0	0	None	g__Bifidobacterium.s__Bifidobacterium_longum	g__Bifidobacterium	0.554473	1	g__Bifidobacterium	K00878	-0.266992	C04294	C04327	1	1	0	1
g__Bifidobacterium.s__Bifidobacterium_longum	C04294	0.0936467	0.00624969	0.0214733	0.9947	1	5-(2-Hydroxyethyl)-4-methylthiazole	0	0	Inconsistent	Consistent	-1	1	2	1	0	Degradation	NA	NA	5-(2-Hydroxyethyl)-4-methylthiazole	0.80999	0.837944	0	0	None	g__Bifidobacterium.s__Bifidobacterium_longum	g__Bifidobacterium	0.554473	1	g__Bifidobacterium	K03707	0.983695	C00378	C04294	1	1	0	0
g__Bifidobacterium.s__Bifidobacterium_longum	C05635	-0.0381454	0.845108	1	0.157242	0.405845	5-Hydroxyindoleacetate	0	0	Inconsistent	Inconsistent	1	0	1	0	1	Synthesis	NA	NA	5-Hydroxyindoleacetate	-18.8648	0.952671	0	0	None	g__Bifidobacterium.s__Bifidobacterium_longum	g__Bifidobacterium	0.773822	1	g__Bifidobacterium	K00128	NA	C05634	C05635	1	1	0	1
g__Bifidobacterium.s__Bifidobacterium_pseudocatenulatum	C01118	-0.04811	0.923004	1	0.0729464	0.222155	O-Succinyl-L-homoserine	0	0	Inconsistent	Inconsistent	-1	2	0	1	0	Degradation	Amino acid	Glycine, serine and threonine metabolism	O-Succinyl-L-homoserine	-32.0101	5.89e-06	0	1	Depleted	g__Bifidobacterium.s__Bifidobacterium_pseudocatenulatum	g__Bifidobacterium	0.521488	1	g__Bifidobacterium	K01739	0.146244	C01118	C00109	1	1	0	1
g__Bifidobacterium.s__Bifidobacterium_pseudocatenulatum	C01118	-0.04811	0.923004	1	0.0729464	0.222155	O-Succinyl-L-homoserine	0	0	Inconsistent	Inconsistent	-1	2	0	1	0	Degradation	Amino acid	Glycine, serine and threonine metabolism	O-Succinyl-L-homoserine	-32.0101	5.89e-06	0	1	Depleted	g__Bifidobacterium.s__Bifidobacterium_pseudocatenulatum	g__Bifidobacterium	0.521488	1	g__Bifidobacterium	K01739	0.146244	C01118	C00155	1	1	0	1
g__Citrobacter.s__Citrobacter_freundii	C00986	0.000696408	0.486626	0.973251	0.504675	0.994506	1,3-Diaminopropane	0	0	Inconsistent	Inconsistent	1	1	1	0	1	Synthesis	NA	NA	1,3-Diaminopropane	-7.55782	0.266182	0	0	None	g__Citrobacter.s__Citrobacter_freundii	g__Citrobacter	0.993385	1	g__Citrobacter	K00316	-0.00577736	C00315	C00986	1	1	0	1
g__Coprococcus.s__Coprococcus_eutactus	C00213	0.045904	0.0488476	0.14181	0.952502	1	Sarcosine	0	0	Inconsistent	Inconsistent	-1	3	0	1	0	Degradation	Amino acid	Glycine, serine and threonine metabolism	Sarcosine	-110.529	0.518121	0	0	None	g__Coprococcus.s__Coprococcus_eutactus	g__Coprococcus	0.95362	1	g__Coprococcus	K00303	0.421432	C00213	C00037	1	1	0	1
g__Escherichia.s__Escherichia_coli	C00015	-0.0075264	0.589871	1	0.416879	0.886695	UDP	0	0	Inconsistent	Inconsistent	-1	2	0	1	0	Degradation	NA	NA	UDP	-12.8565	0.000547673	0	1	Depleted	g__Escherichia.s__Escherichia_coli	g__Escherichia	0.736199	1	g__Escherichia	K00526	0.0785825	C00015	C01346	1	1	0	1
g__Escherichia.s__Escherichia_coli	C00029	-0.0738572	0.979451	1	0.0209989	0.0721502	UDP-glucose	0	0	Inconsistent	Contrasting	-1	6	0	6	0	Degradation	NA	NA	UDP-glucose	-20.6181	4.42e-05	0	1	Depleted	g__Escherichia.s__Escherichia_coli	g__Escherichia	0.853883	1	g__Escherichia	K00697	0.930455	C00029	C00689	1	1	0	2
g__Escherichia.s__Escherichia_coli	C00029	-0.0738572	0.979451	1	0.0209989	0.0721502	UDP-glucose	0	0	Inconsistent	Contrasting	-1	6	0	6	0	Degradation	NA	NA	UDP-glucose	-20.6181	4.42e-05	0	1	Depleted	g__Escherichia.s__Escherichia_coli	g__Escherichia	0.853883	1	g__Escherichia	K04765	0.956323	C00029	C00103	1	1	0	2
g__Escherichia.s__Escherichia_coli	C00029	-0.0738572	0.979451	1	0.0209989	0.0721502	UDP-glucose	0	0	Inconsistent	Contrasting	-1	6	0	6	0	Degradation	NA	NA	UDP-glucose	-20.6181	4.42e-05	0	1	Depleted	g__Escherichia.s__Escherichia_coli	g__Escherichia	0.853883	1	g__Escherichia	K04765	0.956323	C00029	C00105	1	1	0	2
g__Escherichia.s__Escherichia_coli	C00093	0.039907	0.118794	0.294785	0.882856	1	sn-Glycerol 3-phosphate	0	0	Inconsistent	Inconsistent	0	1	3	1	3	Combination	Lipid	Glycerolipid metabolism	sn-Glycerol 3-phosphate	-63.9041	0.000136373	0	1	Depleted	g__Escherichia.s__Escherichia_coli	g__Escherichia	0.552761	1	g__Escherichia	K00864	0.919615	C00116	C00093	1	1	0	2
g__Escherichia.s__Escherichia_coli	C00093	0.039907	0.118794	0.294785	0.882856	1	sn-Glycerol 3-phosphate	0	0	Inconsistent	Inconsistent	0	1	3	1	3	Combination	Lipid	Glycerolipid metabolism	sn-Glycerol 3-phosphate	-63.9041	0.000136373	0	1	Depleted	g__Escherichia.s__Escherichia_coli	g__Escherichia	0.552761	1	g__Escherichia	K01126	0.726479	C00670	C00093	1	1	0	2
g__Escherichia.s__Escherichia_coli	C00093	0.039907	0.118794	0.294785	0.882856	1	sn-Glycerol 3-phosphate	0	0	Inconsistent	Inconsistent	0	1	3	1	3	Combination	Lipid	Glycerolipid metabolism	sn-Glycerol 3-phosphate	-63.9041	0.000136373	0	1	Depleted	g__Escherichia.s__Escherichia_coli	g__Escherichia	0.552761	1	g__Escherichia	K01126	0.726479	C01233	C00093	1	1	0	2
g__Escherichia.s__Escherichia_coli	C00106	0.0731082	0.0121494	0.0397078	0.988851	1	Uracil	0	0	Inconsistent	Consistent	1	2	1	0	1	Synthesis	Nucleotide	Pyrimidine metabolism, uracil containing	Uracil	1876.49	1.17e-08	1	0	Enriched	g__Escherichia.s__Escherichia_coli	g__Escherichia	0.528696	1	g__Escherichia	K01485	-0.210824	C00380	C00106	1	1	0	1
g__Escherichia.s__Escherichia_coli	C00106	0.0731082	0.0121494	0.0397078	0.988851	1	Uracil	0	0	Inconsistent	Consistent	1	2	1	0	1	Synthesis	Nucleotide	Pyrimidine metabolism, uracil containing	Uracil	1876.49	1.17e-08	1	0	Enriched	g__Escherichia.s__Escherichia_coli	g__Escherichia	0.528696	1	g__Escherichia	K09018	0.902331	C00106	C20231	1	1	0	0
g__Escherichia.s__Escherichia_coli	C00106	0.0731082	0.0121494	0.0397078	0.988851	1	Uracil	0	0	Inconsistent	Consistent	1	2	1	0	1	Synthesis	Nucleotide	Pyrimidine metabolism, uracil containing	Uracil	1876.49	1.17e-08	1	0	Enriched	g__Escherichia.s__Escherichia_coli	g__Escherichia	0.528696	1	g__Escherichia	K09024	0.781196	C00106	C20231	1	1	0	0
g__Escherichia.s__Escherichia_coli	C00153	-0.0693261	0.977201	1	0.0239988	0.080396	Nicotinamide	0	0	Inconsistent	Contrasting	-1	1	2	1	0	Degradation	Cofactors and vitamins	Nicotinate and nicotinamide metabolism	Nicotinamide	-20.9079	0.00106797	0	1	Depleted	g__Escherichia.s__Escherichia_coli	g__Escherichia	0.561817	1	g__Escherichia	K08281	0.128216	C00153	C00253	1	1	0	1
g__Escherichia.s__Escherichia_coli	C00311	0.036851	0.167042	0.385924	0.840908	1	Isocitrate	0	0	Inconsistent	Inconsistent	-1	1	0	1	0	Degradation	NA	NA	Isocitrate	-562.857	0.421332	0	0	None	g__Escherichia.s__Escherichia_coli	g__Escherichia	0.794985	1	g__Escherichia	K01637	NA	C00311	C00042	1	1	0	1
g__Escherichia.s__Escherichia_coli	C00506	-0.0394098	0.842708	1	0.157492	0.405845	L-Cysteate	0	0	Inconsistent	Inconsistent	-1	2	0	1	0	Degradation	NA	NA	L-Cysteate	-9.79175	0.110563	0	0	None	g__Escherichia.s__Escherichia_coli	g__Escherichia	0.612204	1	g__Escherichia	K01580	0.0574156	C00506	C00245	1	1	0	1
g__Escherichia.s__Escherichia_coli	C00519	-0.101941	0.9942	1	0.00544973	0.0228207	Hypotaurine	0	0	Inconsistent	Contrasting	1	0	1	0	1	Synthesis	Amino acid	Cysteine, methionine, SAM, taurine metabolism	Hypotaurine	-8.51822	0.0450284	0	1	Depleted	g__Escherichia.s__Escherichia_coli	g__Escherichia	0.615691	1	g__Escherichia	K01580	NA	C00606	C00519	1	1	0	1
g__Escherichia.s__Escherichia_coli	C00670	0.00191709	0.473326	0.960996	0.524974	1	sn-Glycero-3-phosphocholine	0	0	Inconsistent	Inconsistent	-1	2	0	1	0	Degradation	Lipid	Glycerolipid metabolism	sn-Glycero-3-phosphocholine	-20.4626	0.185612	0	0	None	g__Escherichia.s__Escherichia_coli	g__Escherichia	0.567289	1	g__Escherichia	K01126	0.0674105	C00670	C00093	1	1	0	1
g__Escherichia.s__Escherichia_coli	C00670	0.00191709	0.473326	0.960996	0.524974	1	sn-Glycero-3-phosphocholine	0	0	Inconsistent	Inconsistent	-1	2	0	1	0	Degradation	Lipid	Glycerolipid metabolism	sn-Glycero-3-phosphocholine	-20.4626	0.185612	0	0	None	g__Escherichia.s__Escherichia_coli	g__Escherichia	0.567289	1	g__Escherichia	K01126	0.0674105	C00670	C00114	1	1	0	1
g__Escherichia.s__Escherichia_coli	C01118	-0.04811	0.923004	1	0.0729464	0.222155	O-Succinyl-L-homoserine	0	0	Inconsistent	Inconsistent	-1	2	0	1	0	Degradation	Amino acid	Glycine, serine and threonine metabolism	O-Succinyl-L-homoserine	-32.0101	5.89e-06	0	1	Depleted	g__Escherichia.s__Escherichia_coli	g__Escherichia	0.521011	1	g__Escherichia	K01739	0.146244	C01118	C00109	1	1	0	1
g__Escherichia.s__Escherichia_coli	C01118	-0.04811	0.923004	1	0.0729464	0.222155	O-Succinyl-L-homoserine	0	0	Inconsistent	Inconsistent	-1	2	0	1	0	Degradation	Amino acid	Glycine, serine and threonine metabolism	O-Succinyl-L-homoserine	-32.0101	5.89e-06	0	1	Depleted	g__Escherichia.s__Escherichia_coli	g__Escherichia	0.521011	1	g__Escherichia	K01739	0.146244	C01118	C00155	1	1	0	1
g__Escherichia.s__Escherichia_coli	C02376	0.0378843	0.113594	0.287201	0.887056	1	5-Methylcytosine	0	0	Inconsistent	Inconsistent	-1	1	0	1	0	Degradation	NA	NA	5-Methylcytosine	-0.355931	0.137834	0	0	None	g__Escherichia.s__Escherichia_coli	g__Escherichia	0.674072	1	g__Escherichia	K01485	NA	C02376	C00178	1	1	0	1
g__Escherichia.s__Escherichia_coli	C05824	-0.0179529	0.652767	1	0.345233	0.765275	S-Sulfo-L-cysteine	0	0	Inconsistent	Inconsistent	1	0	1	0	1	Synthesis	NA	NA	S-Sulfo-L-cysteine	-8.69559	0.0271646	0	1	Depleted	g__Escherichia.s__Escherichia_coli	g__Escherichia	0.90375	1	g__Escherichia	K12339	NA	C00979	C05824	1	1	0	1
g__Faecalibacterium.s__Faecalibacterium_prausnitzii	C00055	-0.0860098	0.988901	1	0.0111994	0.0416868	CMP	0	0	Inconsistent	Contrasting	1	5	2	0	1	Synthesis	Nucleotide	Pyrimidine metabolism cytidine containing	CMP	-8.09986	0.0192065	0	1	Depleted	g__Faecalibacterium.s__Faecalibacterium_prausnitzii	g__Faecalibacterium	0.543731	1	g__Faecalibacterium	K00876	-0.0645686	C00475	C00055	1	1	0	1
g__Faecalibacterium.s__Faecalibacterium_prausnitzii	C00105	0.0380614	0.159992	0.382838	0.843508	1	UMP	0	0	Inconsistent	Inconsistent	0	5	3	5	3	Combination	NA	NA	UMP	-44.6738	2.73e-06	0	1	Depleted	g__Faecalibacterium.s__Faecalibacterium_prausnitzii	g__Faecalibacterium	0.577154	1	g__Faecalibacterium	K00876	0.848264	C00299	C00105	1	1	0	2
g__Faecalibacterium.s__Faecalibacterium_prausnitzii	C00105	0.0380614	0.159992	0.382838	0.843508	1	UMP	0	0	Inconsistent	Inconsistent	0	5	3	5	3	Combination	NA	NA	UMP	-44.6738	2.73e-06	0	1	Depleted	g__Faecalibacterium.s__Faecalibacterium_prausnitzii	g__Faecalibacterium	0.577154	1	g__Faecalibacterium	K01591	0.757515	C01103	C00105	1	1	0	2
g__Faecalibacterium.s__Faecalibacterium_prausnitzii	C00120	0.0917802	0.00459977	0.0166586	0.9951	1	Biotin	0	0	Inconsistent	Consistent	-1	2	2	1	0	Degradation	NA	NA	Biotin	-4.80275	0.0643868	0	1	Depleted	g__Faecalibacterium.s__Faecalibacterium_prausnitzii	g__Faecalibacterium	0.608847	1	g__Faecalibacterium	K03524	0.143218	C00120	C05921	1	1	0	1
g__Faecalibacterium.s__Faecalibacterium_prausnitzii	C00191	-0.0904289	0.984951	1	0.0155492	0.0548315	D-Glucuronate	0	0	Inconsistent	Contrasting	1	0	1	0	1	Synthesis	Carbohydrate	Glycolysis gluconeogenesis pyruvate metabolism	D-Glucuronate	27.068	0.140437	0	0	None	g__Faecalibacterium.s__Faecalibacterium_prausnitzii	g__Faecalibacterium	0.657355	1	g__Faecalibacterium	K01195	NA	C03033	C00191	1	1	0	1
g__Faecalibacterium.s__Faecalibacterium_prausnitzii	C04294	0.0936467	0.00624969	0.0214733	0.9947	1	5-(2-Hydroxyethyl)-4-methylthiazole	0	0	Inconsistent	Consistent	-1	1	2	1	0	Degradation	NA	NA	5-(2-Hydroxyethyl)-4-methylthiazole	0.80999	0.837944	0	0	None	g__Faecalibacterium.s__Faecalibacterium_prausnitzii	g__Faecalibacterium	0.600329	1	g__Faecalibacterium	K00878	-0.266992	C04294	C04327	1	1	0	1
g__Finegoldia.s__Finegoldia_magna	C00015	-0.0075264	0.589871	1	0.416879	0.886695	UDP	0	0	Inconsistent	Inconsistent	-1	2	0	1	0	Degradation	NA	NA	UDP	-12.8565	0.000547673	0	1	Depleted	g__Finegoldia.s__Finegoldia_magna	g__Finegoldia	0.613875	1	g__Finegoldia	K00526	0.0785825	C00015	C01346	1	1	0	1
g__Fusobacterium.s__Fusobacterium_nucleatum	C00064	-0.0294123	0.80611	1	0.19959	0.486274	L-Glutamine	0	0	Inconsistent	Inconsistent	-1	5	0	5	0	Degradation	Amino acid	Glutamate metabolism	L-Glutamine	-120.158	0.0481929	0	1	Depleted	g__Fusobacterium.s__Fusobacterium_nucleatum	g__Fusobacterium	0.520237	1	g__Fusobacterium	K00764	0.965518	C00064	C03090	1	1	0	2
g__Fusobacterium.s__Fusobacterium_nucleatum	C00064	-0.0294123	0.80611	1	0.19959	0.486274	L-Glutamine	0	0	Inconsistent	Inconsistent	-1	5	0	5	0	Degradation	Amino acid	Glutamate metabolism	L-Glutamine	-120.158	0.0481929	0	1	Depleted	g__Fusobacterium.s__Fusobacterium_nucleatum	g__Fusobacterium	0.520237	1	g__Fusobacterium	K00820	0.978025	C00064	C00352	1	1	0	2
g__Fusobacterium.s__Fusobacterium_nucleatum	C00064	-0.0294123	0.80611	1	0.19959	0.486274	L-Glutamine	0	0	Inconsistent	Inconsistent	-1	5	0	5	0	Degradation	Amino acid	Glutamate metabolism	L-Glutamine	-120.158	0.0481929	0	1	Depleted	g__Fusobacterium.s__Fusobacterium_nucleatum	g__Fusobacterium	0.520237	1	g__Fusobacterium	K01956	0.982515	C00064	C00169	1	1	0	2
g__Haemophilus.s__Haemophilus_parainfluenzae	C00064	-0.0294123	0.80611	1	0.19959	0.486274	L-Glutamine	0	0	Inconsistent	Inconsistent	-1	5	0	5	0	Degradation	Amino acid	Glutamate metabolism	L-Glutamine	-120.158	0.0481929	0	1	Depleted	g__Haemophilus.s__Haemophilus_parainfluenzae	g__Haemophilus	0.631896	1	g__Haemophilus	K00764	0.965518	C00064	C03090	1	1	0	2
g__Haemophilus.s__Haemophilus_parainfluenzae	C00064	-0.0294123	0.80611	1	0.19959	0.486274	L-Glutamine	0	0	Inconsistent	Inconsistent	-1	5	0	5	0	Degradation	Amino acid	Glutamate metabolism	L-Glutamine	-120.158	0.0481929	0	1	Depleted	g__Haemophilus.s__Haemophilus_parainfluenzae	g__Haemophilus	0.631896	1	g__Haemophilus	K00820	0.978025	C00064	C00352	1	1	0	2
g__Haemophilus.s__Haemophilus_parainfluenzae	C00064	-0.0294123	0.80611	1	0.19959	0.486274	L-Glutamine	0	0	Inconsistent	Inconsistent	-1	5	0	5	0	Degradation	Amino acid	Glutamate metabolism	L-Glutamine	-120.158	0.0481929	0	1	Depleted	g__Haemophilus.s__Haemophilus_parainfluenzae	g__Haemophilus	0.631896	1	g__Haemophilus	K01886	0.963619	C00064	C02282	1	1	0	2
g__Haemophilus.s__Haemophilus_parainfluenzae	C00065	-0.012701	0.647218	1	0.354082	0.765275	L-Serine	0	0	Inconsistent	Inconsistent	-1	8	0	8	0	Degradation	Amino acid	Glycine, serine and threonine metabolism	L-Serine	795.899	0.0732937	1	0	Enriched	g__Haemophilus.s__Haemophilus_parainfluenzae	g__Haemophilus	0.57884	1	g__Haemophilus	K00998	0.99612	C00065	C02737	1	1	0	2
g__Haemophilus.s__Haemophilus_parainfluenzae	C00065	-0.012701	0.647218	1	0.354082	0.765275	L-Serine	0	0	Inconsistent	Inconsistent	-1	8	0	8	0	Degradation	Amino acid	Glycine, serine and threonine metabolism	L-Serine	795.899	0.0732937	1	0	Enriched	g__Haemophilus.s__Haemophilus_parainfluenzae	g__Haemophilus	0.57884	1	g__Haemophilus	K01696	0.985879	C00065	C00078	1	1	0	2
g__Haemophilus.s__Haemophilus_parainfluenzae	C00065	-0.012701	0.647218	1	0.354082	0.765275	L-Serine	0	0	Inconsistent	Inconsistent	-1	8	0	8	0	Degradation	Amino acid	Glycine, serine and threonine metabolism	L-Serine	795.899	0.0732937	1	0	Enriched	g__Haemophilus.s__Haemophilus_parainfluenzae	g__Haemophilus	0.57884	1	g__Haemophilus	K01752	0.964284	C00065	C02218	1	1	0	2
g__Haemophilus.s__Haemophilus_parainfluenzae	C00065	-0.012701	0.647218	1	0.354082	0.765275	L-Serine	0	0	Inconsistent	Inconsistent	-1	8	0	8	0	Degradation	Amino acid	Glycine, serine and threonine metabolism	L-Serine	795.899	0.0732937	1	0	Enriched	g__Haemophilus.s__Haemophilus_parainfluenzae	g__Haemophilus	0.57884	1	g__Haemophilus	K01875	0.926886	C00065	C02553	1	1	0	2
g__Haemophilus.s__Haemophilus_parainfluenzae	C00065	-0.012701	0.647218	1	0.354082	0.765275	L-Serine	0	0	Inconsistent	Inconsistent	-1	8	0	8	0	Degradation	Amino acid	Glycine, serine and threonine metabolism	L-Serine	795.899	0.0732937	1	0	Enriched	g__Haemophilus.s__Haemophilus_parainfluenzae	g__Haemophilus	0.57884	1	g__Haemophilus	K01875	0.926886	C00065	C06481	1	1	0	2
g__Klebsiella.s__Klebsiella_pneumoniae	C00106	0.0731082	0.0121494	0.0397078	0.988851	1	Uracil	0	0	Inconsistent	Consistent	1	2	1	0	1	Synthesis	Nucleotide	Pyrimidine metabolism, uracil containing	Uracil	1876.49	1.17e-08	1	0	Enriched	g__Klebsiella.s__Klebsiella_pneumoniae	g__Klebsiella	0.568192	1	g__Klebsiella	K01485	-0.210824	C00380	C00106	1	1	0	1
g__Klebsiella.s__Klebsiella_pneumoniae	C00106	0.0731082	0.0121494	0.0397078	0.988851	1	Uracil	0	0	Inconsistent	Consistent	1	2	1	0	1	Synthesis	Nucleotide	Pyrimidine metabolism, uracil containing	Uracil	1876.49	1.17e-08	1	0	Enriched	g__Klebsiella.s__Klebsiella_pneumoniae	g__Klebsiella	0.568192	1	g__Klebsiella	K09018	0.902331	C00106	C20231	1	1	0	0
g__Klebsiella.s__Klebsiella_pneumoniae	C00106	0.0731082	0.0121494	0.0397078	0.988851	1	Uracil	0	0	Inconsistent	Consistent	1	2	1	0	1	Synthesis	Nucleotide	Pyrimidine metabolism, uracil containing	Uracil	1876.49	1.17e-08	1	0	Enriched	g__Klebsiella.s__Klebsiella_pneumoniae	g__Klebsiella	0.568192	1	g__Klebsiella	K09024	0.781196	C00106	C20231	1	1	0	0
g__Klebsiella.s__Klebsiella_pneumoniae	C00311	0.036851	0.167042	0.385924	0.840908	1	Isocitrate	0	0	Inconsistent	Inconsistent	-1	1	0	1	0	Degradation	NA	NA	Isocitrate	-562.857	0.421332	0	0	None	g__Klebsiella.s__Klebsiella_pneumoniae	g__Klebsiella	0.539867	1	g__Klebsiella	K01637	NA	C00311	C00042	1	1	0	1
g__Klebsiella.s__Klebsiella_pneumoniae	C02376	0.0378843	0.113594	0.287201	0.887056	1	5-Methylcytosine	0	0	Inconsistent	Inconsistent	-1	1	0	1	0	Degradation	NA	NA	5-Methylcytosine	-0.355931	0.137834	0	0	None	g__Klebsiella.s__Klebsiella_pneumoniae	g__Klebsiella	0.742306	1	g__Klebsiella	K01485	NA	C02376	C00178	1	1	0	1
g__Lactobacillus.s__Lactobacillus_fermentum	C01571	0.00692066	0.416129	0.87127	0.588821	1	Decanoic acid	0	0	Inconsistent	Inconsistent	1	0	1	0	1	Synthesis	Lipid	Medium chain fatty acid	Decanoic acid	0.798619	0.486815	0	0	None	g__Lactobacillus.s__Lactobacillus_fermentum	g__Lactobacillus	0.647753	1	g__Lactobacillus	K01071	NA	C05755	C01571	1	1	0	1
g__Lactobacillus.s__Lactobacillus_fermentum	C01762	0.0207517	0.260987	0.564069	0.737763	1	Xanthosine	0	0	Inconsistent	Inconsistent	-1	1	0	1	0	Degradation	Nucleotide	Purine metabolism (hypo)xanthine-inosine containing	Xanthosine	0.600924	0.674016	0	0	None	g__Lactobacillus.s__Lactobacillus_fermentum	g__Lactobacillus	0.76387	1	g__Lactobacillus	K01239	NA	C01762	C00385	1	1	0	1
g__Lactobacillus.s__Lactobacillus_salivarius	C00262	-0.0407868	0.910054	1	0.0873956	0.254587	Hypoxanthine	0	0	Inconsistent	Inconsistent	0	6	5	6	5	Combination	Nucleotide	Purine metabolism, (hypo)xanthine/inosine containing	Hypoxanthine	455.042	1.32e-06	1	0	Enriched	g__Lactobacillus.s__Lactobacillus_salivarius	g__Lactobacillus	0.524383	1	g__Lactobacillus	K01239	0.959821	C00294	C00262	1	1	0	2
g__Lactobacillus.s__Lactobacillus_salivarius	C00262	-0.0407868	0.910054	1	0.0873956	0.254587	Hypoxanthine	0	0	Inconsistent	Inconsistent	0	6	5	6	5	Combination	Nucleotide	Purine metabolism, (hypo)xanthine/inosine containing	Hypoxanthine	455.042	1.32e-06	1	0	Enriched	g__Lactobacillus.s__Lactobacillus_salivarius	g__Lactobacillus	0.524383	1	g__Lactobacillus	K01486	0.905616	C00147	C00262	1	1	0	2
g__Lactobacillus.s__Lactobacillus_salivarius	C01762	0.0207517	0.260987	0.564069	0.737763	1	Xanthosine	0	0	Inconsistent	Inconsistent	-1	1	0	1	0	Degradation	Nucleotide	Purine metabolism (hypo)xanthine-inosine containing	Xanthosine	0.600924	0.674016	0	0	None	g__Lactobacillus.s__Lactobacillus_salivarius	g__Lactobacillus	0.6298	1	g__Lactobacillus	K01239	NA	C01762	C00385	1	1	0	1
g__Megamonas.s__Megamonas_funiformis	C00078	-0.0450101	0.882256	1	0.116444	0.318439	L-Tryptophan	0	0	Inconsistent	Inconsistent	0	3	3	3	3	Combination	Amino acid	Tryptophan metabolism	L-Tryptophan	454.029	0.00984427	1	0	Enriched	g__Megamonas.s__Megamonas_funiformis	g__Megamonas	0.600788	1	g__Megamonas	K01695	0.724756	C00065	C00078	1	1	0	2
g__Megamonas.s__Megamonas_funiformis	C00078	-0.0450101	0.882256	1	0.116444	0.318439	L-Tryptophan	0	0	Inconsistent	Inconsistent	0	3	3	3	3	Combination	Amino acid	Tryptophan metabolism	L-Tryptophan	454.029	0.00984427	1	0	Enriched	g__Megamonas.s__Megamonas_funiformis	g__Megamonas	0.600788	1	g__Megamonas	K01696	0.591088	C00065	C00078	1	1	0	2
g__Megamonas.s__Megamonas_funiformis	C00199	0.0469763	0.162942	0.383056	0.836458	1	D-Ribulose 5-phosphate	0	0	Inconsistent	Inconsistent	-1	2	0	2	0	Degradation	NA	NA	D-Ribulose 5-phosphate	-3.50577	0.287088	0	0	None	g__Megamonas.s__Megamonas_funiformis	g__Megamonas	0.522722	1	g__Megamonas	K06215	0.893539	C00199	C00018	1	1	0	2
g__Megamonas.s__Megamonas_funiformis	C00199	0.0469763	0.162942	0.383056	0.836458	1	D-Ribulose 5-phosphate	0	0	Inconsistent	Inconsistent	-1	2	0	2	0	Degradation	NA	NA	D-Ribulose 5-phosphate	-3.50577	0.287088	0	0	None	g__Megamonas.s__Megamonas_funiformis	g__Megamonas	0.522722	1	g__Megamonas	K08681	0.941481	C00199	C00018	1	1	0	2
g__Megamonas.s__Megamonas_hypermegale	C00078	-0.0450101	0.882256	1	0.116444	0.318439	L-Tryptophan	0	0	Inconsistent	Inconsistent	0	3	3	3	3	Combination	Amino acid	Tryptophan metabolism	L-Tryptophan	454.029	0.00984427	1	0	Enriched	g__Megamonas.s__Megamonas_hypermegale	g__Megamonas	0.541303	1	g__Megamonas	K01695	0.724756	C00065	C00078	1	1	0	2
g__Megamonas.s__Megamonas_hypermegale	C00078	-0.0450101	0.882256	1	0.116444	0.318439	L-Tryptophan	0	0	Inconsistent	Inconsistent	0	3	3	3	3	Combination	Amino acid	Tryptophan metabolism	L-Tryptophan	454.029	0.00984427	1	0	Enriched	g__Megamonas.s__Megamonas_hypermegale	g__Megamonas	0.541303	1	g__Megamonas	K01696	0.591088	C00065	C00078	1	1	0	2
g__Megamonas.s__Megamonas_hypermegale	C00199	0.0469763	0.162942	0.383056	0.836458	1	D-Ribulose 5-phosphate	0	0	Inconsistent	Inconsistent	-1	2	0	2	0	Degradation	NA	NA	D-Ribulose 5-phosphate	-3.50577	0.287088	0	0	None	g__Megamonas.s__Megamonas_hypermegale	g__Megamonas	0.601767	1	g__Megamonas	K06215	0.893539	C00199	C00018	1	1	0	2
g__Megamonas.s__Megamonas_hypermegale	C00199	0.0469763	0.162942	0.383056	0.836458	1	D-Ribulose 5-phosphate	0	0	Inconsistent	Inconsistent	-1	2	0	2	0	Degradation	NA	NA	D-Ribulose 5-phosphate	-3.50577	0.287088	0	0	None	g__Megamonas.s__Megamonas_hypermegale	g__Megamonas	0.601767	1	g__Megamonas	K08681	0.941481	C00199	C00018	1	1	0	2
g__Megamonas.s__Megamonas_hypermegale	C02656	-0.0411969	0.889756	1	0.114794	0.318439	Pimelate	0	0	Inconsistent	Inconsistent	-1	1	0	1	0	Degradation	NA	NA	Pimelate	-86.034	0.00896352	0	1	Depleted	g__Megamonas.s__Megamonas_hypermegale	g__Megamonas	0.933681	1	g__Megamonas	K01906	NA	C02656	C01063	1	1	0	1
g__Megasphaera.s__Megasphaera_elsdenii	C00431	0.0489756	0.127644	0.310986	0.873356	1	5-Aminopentanoate	0	0	Inconsistent	Inconsistent	1	0	2	0	2	Synthesis	Amino acid	Urea cycle; arginine-, proline-, metabolism	5-Aminopentanoate	-7750.15	0.000225062	0	1	Depleted	g__Megasphaera.s__Megasphaera_elsdenii	g__Megasphaera	0.950721	1	g__Megasphaera	K10793	0.866093	C00763	C00431	1	1	0	2
g__Methanobrevibacter.s__Methanobrevibacter_smithii	C00630	-0.0408164	0.899555	1	0.102995	0.293645	2-Methylpropanoyl-CoA	0	0	Inconsistent	Inconsistent	1	0	3	0	3	Synthesis	NA	NA	2-Methylpropanoyl-CoA	14.8601	0.000240519	1	0	Enriched	g__Methanobrevibacter.s__Methanobrevibacter_smithii	g__Methanobrevibacter	0.973156	1	g__Methanobrevibacter	K00187	0.818095	C00141	C00630	1	1	0	2
g__Methanobrevibacter.s__Methanobrevibacter_smithii	C00630	-0.0408164	0.899555	1	0.102995	0.293645	2-Methylpropanoyl-CoA	0	0	Inconsistent	Inconsistent	1	0	3	0	3	Synthesis	NA	NA	2-Methylpropanoyl-CoA	14.8601	0.000240519	1	0	Enriched	g__Methanobrevibacter.s__Methanobrevibacter_smithii	g__Methanobrevibacter	0.973156	1	g__Methanobrevibacter	K00188	0.95502	C00141	C00630	1	1	0	2
g__Olsenella.s__Olsenella_uli	C00065	-0.012701	0.647218	1	0.354082	0.765275	L-Serine	0	0	Inconsistent	Inconsistent	-1	8	0	8	0	Degradation	Amino acid	Glycine, serine and threonine metabolism	L-Serine	795.899	0.0732937	1	0	Enriched	g__Olsenella.s__Olsenella_uli	g__Olsenella	0.503599	1	g__Olsenella	K01695	0.994262	C00065	C00078	1	1	0	2
g__Olsenella.s__Olsenella_uli	C00065	-0.012701	0.647218	1	0.354082	0.765275	L-Serine	0	0	Inconsistent	Inconsistent	-1	8	0	8	0	Degradation	Amino acid	Glycine, serine and threonine metabolism	L-Serine	795.899	0.0732937	1	0	Enriched	g__Olsenella.s__Olsenella_uli	g__Olsenella	0.503599	1	g__Olsenella	K01752	0.964284	C00065	C02218	1	1	0	2
g__Olsenella.s__Olsenella_uli	C00065	-0.012701	0.647218	1	0.354082	0.765275	L-Serine	0	0	Inconsistent	Inconsistent	-1	8	0	8	0	Degradation	Amino acid	Glycine, serine and threonine metabolism	L-Serine	795.899	0.0732937	1	0	Enriched	g__Olsenella.s__Olsenella_uli	g__Olsenella	0.503599	1	g__Olsenella	K01875	0.926886	C00065	C02553	1	1	0	2
g__Olsenella.s__Olsenella_uli	C00065	-0.012701	0.647218	1	0.354082	0.765275	L-Serine	0	0	Inconsistent	Inconsistent	-1	8	0	8	0	Degradation	Amino acid	Glycine, serine and threonine metabolism	L-Serine	795.899	0.0732937	1	0	Enriched	g__Olsenella.s__Olsenella_uli	g__Olsenella	0.503599	1	g__Olsenella	K01875	0.926886	C00065	C06481	1	1	0	2
g__Parabacteroides.s__Parabacteroides_distasonis	C00086	0.0633814	0.0502975	0.14181	0.952602	1	Urea	0	0	Inconsistent	Inconsistent	1	0	1	0	1	Synthesis	Amino acid	Urea cycle; arginine-, proline-, metabolism	Urea	-6582.43	2.71e-06	0	1	Depleted	g__Parabacteroides.s__Parabacteroides_distasonis	g__Parabacteroides	0.988219	1	g__Parabacteroides	K01476	NA	C00062	C00086	1	1	0	1
g__Streptococcus.s__Streptococcus_gordonii	C00064	-0.0294123	0.80611	1	0.19959	0.486274	L-Glutamine	0	0	Inconsistent	Inconsistent	-1	5	0	5	0	Degradation	Amino acid	Glutamate metabolism	L-Glutamine	-120.158	0.0481929	0	1	Depleted	g__Streptococcus.s__Streptococcus_gordonii	g__Streptococcus	0.535245	1	g__Streptococcus	K00820	0.978025	C00064	C00352	1	1	0	2
g__Streptococcus.s__Streptococcus_gordonii	C00064	-0.0294123	0.80611	1	0.19959	0.486274	L-Glutamine	0	0	Inconsistent	Inconsistent	-1	5	0	5	0	Degradation	Amino acid	Glutamate metabolism	L-Glutamine	-120.158	0.0481929	0	1	Depleted	g__Streptococcus.s__Streptococcus_gordonii	g__Streptococcus	0.535245	1	g__Streptococcus	K01956	0.982515	C00064	C00169	1	1	0	2
g__Streptococcus.s__Streptococcus_lutetiensis	C00092	0.0315113	0.216989	0.484609	0.781911	1	D-Glucose 6-phosphate	0	0	Inconsistent	Inconsistent	1	0	5	0	5	Synthesis	NA	NA	D-Glucose 6-phosphate	-54.0018	0.00293256	0	1	Depleted	g__Streptococcus.s__Streptococcus_lutetiensis	g__Streptococcus	0.525245	1	g__Streptococcus	K01193	0.905819	C16688	C00092	1	1	0	2
g__Streptococcus.s__Streptococcus_lutetiensis	C00092	0.0315113	0.216989	0.484609	0.781911	1	D-Glucose 6-phosphate	0	0	Inconsistent	Inconsistent	1	0	5	0	5	Synthesis	NA	NA	D-Glucose 6-phosphate	-54.0018	0.00293256	0	1	Depleted	g__Streptococcus.s__Streptococcus_lutetiensis	g__Streptococcus	0.525245	1	g__Streptococcus	K01223	0.964759	C04534	C00092	1	1	0	2
g__Streptococcus.s__Streptococcus_lutetiensis	C01571	0.00692066	0.416129	0.87127	0.588821	1	Decanoic acid	0	0	Inconsistent	Inconsistent	1	0	1	0	1	Synthesis	Lipid	Medium chain fatty acid	Decanoic acid	0.798619	0.486815	0	0	None	g__Streptococcus.s__Streptococcus_lutetiensis	g__Streptococcus	0.760497	1	g__Streptococcus	K01071	NA	C05755	C01571	1	1	0	1
g__Streptococcus.s__Streptococcus_lutetiensis	C01762	0.0207517	0.260987	0.564069	0.737763	1	Xanthosine	0	0	Inconsistent	Inconsistent	-1	1	0	1	0	Degradation	Nucleotide	Purine metabolism (hypo)xanthine-inosine containing	Xanthosine	0.600924	0.674016	0	0	None	g__Streptococcus.s__Streptococcus_lutetiensis	g__Streptococcus	0.623134	1	g__Streptococcus	K01239	NA	C01762	C00385	1	1	0	1
g__Streptococcus.s__Streptococcus_mutans	C00064	-0.0294123	0.80611	1	0.19959	0.486274	L-Glutamine	0	0	Inconsistent	Inconsistent	-1	5	0	5	0	Degradation	Amino acid	Glutamate metabolism	L-Glutamine	-120.158	0.0481929	0	1	Depleted	g__Streptococcus.s__Streptococcus_mutans	g__Streptococcus	0.64054	1	g__Streptococcus	K00820	0.978025	C00064	C00352	1	1	0	2
g__Streptococcus.s__Streptococcus_mutans	C00064	-0.0294123	0.80611	1	0.19959	0.486274	L-Glutamine	0	0	Inconsistent	Inconsistent	-1	5	0	5	0	Degradation	Amino acid	Glutamate metabolism	L-Glutamine	-120.158	0.0481929	0	1	Depleted	g__Streptococcus.s__Streptococcus_mutans	g__Streptococcus	0.64054	1	g__Streptococcus	K01956	0.982515	C00064	C00169	1	1	0	2
g__Streptococcus.s__Streptococcus_mutans	C00065	-0.012701	0.647218	1	0.354082	0.765275	L-Serine	0	0	Inconsistent	Inconsistent	-1	8	0	8	0	Degradation	Amino acid	Glycine, serine and threonine metabolism	L-Serine	795.899	0.0732937	1	0	Enriched	g__Streptococcus.s__Streptococcus_mutans	g__Streptococcus	0.56092	1	g__Streptococcus	K01695	0.994262	C00065	C00078	1	1	0	2
g__Streptococcus.s__Streptococcus_mutans	C00065	-0.012701	0.647218	1	0.354082	0.765275	L-Serine	0	0	Inconsistent	Inconsistent	-1	8	0	8	0	Degradation	Amino acid	Glycine, serine and threonine metabolism	L-Serine	795.899	0.0732937	1	0	Enriched	g__Streptococcus.s__Streptococcus_mutans	g__Streptococcus	0.56092	1	g__Streptococcus	K01696	0.985879	C00065	C00078	1	1	0	2
g__Streptococcus.s__Streptococcus_mutans	C00065	-0.012701	0.647218	1	0.354082	0.765275	L-Serine	0	0	Inconsistent	Inconsistent	-1	8	0	8	0	Degradation	Amino acid	Glycine, serine and threonine metabolism	L-Serine	795.899	0.0732937	1	0	Enriched	g__Streptococcus.s__Streptococcus_mutans	g__Streptococcus	0.56092	1	g__Streptococcus	K01875	0.926886	C00065	C02553	1	1	0	2
g__Streptococcus.s__Streptococcus_mutans	C00065	-0.012701	0.647218	1	0.354082	0.765275	L-Serine	0	0	Inconsistent	Inconsistent	-1	8	0	8	0	Degradation	Amino acid	Glycine, serine and threonine metabolism	L-Serine	795.899	0.0732937	1	0	Enriched	g__Streptococcus.s__Streptococcus_mutans	g__Streptococcus	0.56092	1	g__Streptococcus	K01875	0.926886	C00065	C06481	1	1	0	2
g__Streptococcus.s__Streptococcus_mutans	C02504	-0.0955358	0.99525	1	0.00654967	0.0265956	alpha-Isopropylmalate	0	0	Inconsistent	Contrasting	-1	2	0	2	0	Degradation	NA	NA	alpha-Isopropylmalate	-15.3068	0.00377081	0	1	Depleted	g__Streptococcus.s__Streptococcus_mutans	g__Streptococcus	0.510858	1	g__Streptococcus	K01703	0.912832	C02504	C04411	1	1	0	2
g__Streptococcus.s__Streptococcus_mutans	C02504	-0.0955358	0.99525	1	0.00654967	0.0265956	alpha-Isopropylmalate	0	0	Inconsistent	Contrasting	-1	2	0	2	0	Degradation	NA	NA	alpha-Isopropylmalate	-15.3068	0.00377081	0	1	Depleted	g__Streptococcus.s__Streptococcus_mutans	g__Streptococcus	0.510858	1	g__Streptococcus	K01704	0.916441	C02504	C04411	1	1	0	2
g__Streptococcus.s__Streptococcus_parasanguinis	C00020	-0.00182585	0.522174	1	0.473176	0.960691	AMP	0	0	Inconsistent	Inconsistent	1	6	2	0	1	Synthesis	Nucleotide	Purine metabolism, adenine containing	AMP	-34.4977	1.2e-05	0	1	Depleted	g__Streptococcus.s__Streptococcus_parasanguinis	g__Streptococcus	0.539303	1	g__Streptococcus	K01756	0.450529	C03794	C00020	1	1	0	1
g__Streptococcus.s__Streptococcus_salivarius	C00020	-0.00182585	0.522174	1	0.473176	0.960691	AMP	0	0	Inconsistent	Inconsistent	1	6	2	0	1	Synthesis	Nucleotide	Purine metabolism, adenine containing	AMP	-34.4977	1.2e-05	0	1	Depleted	g__Streptococcus.s__Streptococcus_salivarius	g__Streptococcus	0.563336	1	g__Streptococcus	K01756	0.450529	C03794	C00020	1	1	0	1
g__Streptococcus.s__Streptococcus_salivarius	C00055	-0.0860098	0.988901	1	0.0111994	0.0416868	CMP	0	0	Inconsistent	Contrasting	1	5	2	0	1	Synthesis	Nucleotide	Pyrimidine metabolism cytidine containing	CMP	-8.09986	0.0192065	0	1	Depleted	g__Streptococcus.s__Streptococcus_salivarius	g__Streptococcus	0.548561	1	g__Streptococcus	K00876	-0.0645686	C00475	C00055	1	1	0	1
g__Streptococcus.s__Streptococcus_salivarius	C00064	-0.0294123	0.80611	1	0.19959	0.486274	L-Glutamine	0	0	Inconsistent	Inconsistent	-1	5	0	5	0	Degradation	Amino acid	Glutamate metabolism	L-Glutamine	-120.158	0.0481929	0	1	Depleted	g__Streptococcus.s__Streptococcus_salivarius	g__Streptococcus	0.601161	1	g__Streptococcus	K00764	0.965518	C00064	C03090	1	1	0	2
g__Streptococcus.s__Streptococcus_salivarius	C00064	-0.0294123	0.80611	1	0.19959	0.486274	L-Glutamine	0	0	Inconsistent	Inconsistent	-1	5	0	5	0	Degradation	Amino acid	Glutamate metabolism	L-Glutamine	-120.158	0.0481929	0	1	Depleted	g__Streptococcus.s__Streptococcus_salivarius	g__Streptococcus	0.601161	1	g__Streptococcus	K00820	0.978025	C00064	C00352	1	1	0	2
g__Streptococcus.s__Streptococcus_salivarius	C00065	-0.012701	0.647218	1	0.354082	0.765275	L-Serine	0	0	Inconsistent	Inconsistent	-1	8	0	8	0	Degradation	Amino acid	Glycine, serine and threonine metabolism	L-Serine	795.899	0.0732937	1	0	Enriched	g__Streptococcus.s__Streptococcus_salivarius	g__Streptococcus	0.524338	1	g__Streptococcus	K01695	0.994262	C00065	C00078	1	1	0	2
g__Streptococcus.s__Streptococcus_salivarius	C00065	-0.012701	0.647218	1	0.354082	0.765275	L-Serine	0	0	Inconsistent	Inconsistent	-1	8	0	8	0	Degradation	Amino acid	Glycine, serine and threonine metabolism	L-Serine	795.899	0.0732937	1	0	Enriched	g__Streptococcus.s__Streptococcus_salivarius	g__Streptococcus	0.524338	1	g__Streptococcus	K01696	0.985879	C00065	C00078	1	1	0	2
g__Streptococcus.s__Streptococcus_salivarius	C00065	-0.012701	0.647218	1	0.354082	0.765275	L-Serine	0	0	Inconsistent	Inconsistent	-1	8	0	8	0	Degradation	Amino acid	Glycine, serine and threonine metabolism	L-Serine	795.899	0.0732937	1	0	Enriched	g__Streptococcus.s__Streptococcus_salivarius	g__Streptococcus	0.524338	1	g__Streptococcus	K01875	0.926886	C00065	C02553	1	1	0	2
g__Streptococcus.s__Streptococcus_salivarius	C00065	-0.012701	0.647218	1	0.354082	0.765275	L-Serine	0	0	Inconsistent	Inconsistent	-1	8	0	8	0	Degradation	Amino acid	Glycine, serine and threonine metabolism	L-Serine	795.899	0.0732937	1	0	Enriched	g__Streptococcus.s__Streptococcus_salivarius	g__Streptococcus	0.524338	1	g__Streptococcus	K01875	0.926886	C00065	C06481	1	1	0	2
g__Streptococcus.s__Streptococcus_salivarius	C00065	-0.012701	0.647218	1	0.354082	0.765275	L-Serine	0	0	Inconsistent	Inconsistent	-1	8	0	8	0	Degradation	Amino acid	Glycine, serine and threonine metabolism	L-Serine	795.899	0.0732937	1	0	Enriched	g__Streptococcus.s__Streptococcus_salivarius	g__Streptococcus	0.524338	1	g__Streptococcus	K17103	0.990559	C00065	C02737	1	1	0	2
g__Streptococcus.s__Streptococcus_salivarius	C00085	0.0475202	0.104345	0.268888	0.900605	1	D-Fructose 6-phosphate	0	0	Inconsistent	Inconsistent	-1	1	3	1	0	Degradation	NA	NA	D-Fructose 6-phosphate	-13.4212	0.00985627	0	1	Depleted	g__Streptococcus.s__Streptococcus_salivarius	g__Streptococcus	0.505576	1	g__Streptococcus	K00820	0.423128	C00085	C00352	1	1	0	1
g__Streptococcus.s__Streptococcus_salivarius	C00085	0.0475202	0.104345	0.268888	0.900605	1	D-Fructose 6-phosphate	0	0	Inconsistent	Inconsistent	-1	1	3	1	0	Degradation	NA	NA	D-Fructose 6-phosphate	-13.4212	0.00985627	0	1	Depleted	g__Streptococcus.s__Streptococcus_salivarius	g__Streptococcus	0.505576	1	g__Streptococcus	K02564	0.915125	C00352	C00085	1	1	0	0
g__Streptococcus.s__Streptococcus_salivarius	C00105	0.0380614	0.159992	0.382838	0.843508	1	UMP	0	0	Inconsistent	Inconsistent	0	5	3	5	3	Combination	NA	NA	UMP	-44.6738	2.73e-06	0	1	Depleted	g__Streptococcus.s__Streptococcus_salivarius	g__Streptococcus	0.508874	1	g__Streptococcus	K00876	0.848264	C00299	C00105	1	1	0	2
g__Streptococcus.s__Streptococcus_salivarius	C00105	0.0380614	0.159992	0.382838	0.843508	1	UMP	0	0	Inconsistent	Inconsistent	0	5	3	5	3	Combination	NA	NA	UMP	-44.6738	2.73e-06	0	1	Depleted	g__Streptococcus.s__Streptococcus_salivarius	g__Streptococcus	0.508874	1	g__Streptococcus	K01591	0.757515	C01103	C00105	1	1	0	2
g__Veillonella.s__Veillonella_atypica	C00020	-0.00182585	0.522174	1	0.473176	0.960691	AMP	0	0	Inconsistent	Inconsistent	1	6	2	0	1	Synthesis	Nucleotide	Purine metabolism, adenine containing	AMP	-34.4977	1.2e-05	0	1	Depleted	g__Veillonella.s__Veillonella_atypica	g__Veillonella	0.591554	1	g__Veillonella	K01756	0.450529	C03794	C00020	1	1	0	1
g__Veillonella.s__Veillonella_atypica	C00047	-0.069037	0.974451	1	0.0252487	0.0825203	L-Lysine	0	0	Inconsistent	Contrasting	-1	3	1	1	0	Degradation	Amino acid	Lysine metabolism	L-Lysine	1993.2	0.607744	0	0	None	g__Veillonella.s__Veillonella_atypica	g__Veillonella	0.561805	1	g__Veillonella	K04567	0.149766	C00047	C01931	1	1	0	1
g__Veillonella.s__Veillonella_atypica	C00064	-0.0294123	0.80611	1	0.19959	0.486274	L-Glutamine	0	0	Inconsistent	Inconsistent	-1	5	0	5	0	Degradation	Amino acid	Glutamate metabolism	L-Glutamine	-120.158	0.0481929	0	1	Depleted	g__Veillonella.s__Veillonella_atypica	g__Veillonella	0.682911	1	g__Veillonella	K00764	0.965518	C00064	C03090	1	1	0	2
g__Veillonella.s__Veillonella_atypica	C00064	-0.0294123	0.80611	1	0.19959	0.486274	L-Glutamine	0	0	Inconsistent	Inconsistent	-1	5	0	5	0	Degradation	Amino acid	Glutamate metabolism	L-Glutamine	-120.158	0.0481929	0	1	Depleted	g__Veillonella.s__Veillonella_atypica	g__Veillonella	0.682911	1	g__Veillonella	K00820	0.978025	C00064	C00352	1	1	0	2
g__Veillonella.s__Veillonella_atypica	C00064	-0.0294123	0.80611	1	0.19959	0.486274	L-Glutamine	0	0	Inconsistent	Inconsistent	-1	5	0	5	0	Degradation	Amino acid	Glutamate metabolism	L-Glutamine	-120.158	0.0481929	0	1	Depleted	g__Veillonella.s__Veillonella_atypica	g__Veillonella	0.682911	1	g__Veillonella	K01956	0.982515	C00064	C00169	1	1	0	2
g__Veillonella.s__Veillonella_atypica	C00065	-0.012701	0.647218	1	0.354082	0.765275	L-Serine	0	0	Inconsistent	Inconsistent	-1	8	0	8	0	Degradation	Amino acid	Glycine, serine and threonine metabolism	L-Serine	795.899	0.0732937	1	0	Enriched	g__Veillonella.s__Veillonella_atypica	g__Veillonella	0.657836	1	g__Veillonella	K01695	0.994262	C00065	C00078	1	1	0	2
g__Veillonella.s__Veillonella_atypica	C00065	-0.012701	0.647218	1	0.354082	0.765275	L-Serine	0	0	Inconsistent	Inconsistent	-1	8	0	8	0	Degradation	Amino acid	Glycine, serine and threonine metabolism	L-Serine	795.899	0.0732937	1	0	Enriched	g__Veillonella.s__Veillonella_atypica	g__Veillonella	0.657836	1	g__Veillonella	K01696	0.985879	C00065	C00078	1	1	0	2
g__Veillonella.s__Veillonella_atypica	C00065	-0.012701	0.647218	1	0.354082	0.765275	L-Serine	0	0	Inconsistent	Inconsistent	-1	8	0	8	0	Degradation	Amino acid	Glycine, serine and threonine metabolism	L-Serine	795.899	0.0732937	1	0	Enriched	g__Veillonella.s__Veillonella_atypica	g__Veillonella	0.657836	1	g__Veillonella	K01875	0.926886	C00065	C02553	1	1	0	2
g__Veillonella.s__Veillonella_atypica	C00065	-0.012701	0.647218	1	0.354082	0.765275	L-Serine	0	0	Inconsistent	Inconsistent	-1	8	0	8	0	Degradation	Amino acid	Glycine, serine and threonine metabolism	L-Serine	795.899	0.0732937	1	0	Enriched	g__Veillonella.s__Veillonella_atypica	g__Veillonella	0.657836	1	g__Veillonella	K01875	0.926886	C00065	C06481	1	1	0	2
g__Veillonella.s__Veillonella_atypica	C00085	0.0475202	0.104345	0.268888	0.900605	1	D-Fructose 6-phosphate	0	0	Inconsistent	Inconsistent	-1	1	3	1	0	Degradation	NA	NA	D-Fructose 6-phosphate	-13.4212	0.00985627	0	1	Depleted	g__Veillonella.s__Veillonella_atypica	g__Veillonella	0.655041	1	g__Veillonella	K00820	0.423128	C00085	C00352	1	1	0	1
g__Veillonella.s__Veillonella_dispar	C00064	-0.0294123	0.80611	1	0.19959	0.486274	L-Glutamine	0	0	Inconsistent	Inconsistent	-1	5	0	5	0	Degradation	Amino acid	Glutamate metabolism	L-Glutamine	-120.158	0.0481929	0	1	Depleted	g__Veillonella.s__Veillonella_dispar	g__Veillonella	0.548503	1	g__Veillonella	K00764	0.965518	C00064	C03090	1	1	0	2
g__Veillonella.s__Veillonella_dispar	C00064	-0.0294123	0.80611	1	0.19959	0.486274	L-Glutamine	0	0	Inconsistent	Inconsistent	-1	5	0	5	0	Degradation	Amino acid	Glutamate metabolism	L-Glutamine	-120.158	0.0481929	0	1	Depleted	g__Veillonella.s__Veillonella_dispar	g__Veillonella	0.548503	1	g__Veillonella	K00820	0.978025	C00064	C00352	1	1	0	2
g__Veillonella.s__Veillonella_dispar	C00064	-0.0294123	0.80611	1	0.19959	0.486274	L-Glutamine	0	0	Inconsistent	Inconsistent	-1	5	0	5	0	Degradation	Amino acid	Glutamate metabolism	L-Glutamine	-120.158	0.0481929	0	1	Depleted	g__Veillonella.s__Veillonella_dispar	g__Veillonella	0.548503	1	g__Veillonella	K01886	0.963619	C00064	C02282	1	1	0	2
g__Veillonella.s__Veillonella_dispar	C00064	-0.0294123	0.80611	1	0.19959	0.486274	L-Glutamine	0	0	Inconsistent	Inconsistent	-1	5	0	5	0	Degradation	Amino acid	Glutamate metabolism	L-Glutamine	-120.158	0.0481929	0	1	Depleted	g__Veillonella.s__Veillonella_dispar	g__Veillonella	0.548503	1	g__Veillonella	K01956	0.982515	C00064	C00169	1	1	0	2
g__Veillonella.s__Veillonella_dispar	C00065	-0.012701	0.647218	1	0.354082	0.765275	L-Serine	0	0	Inconsistent	Inconsistent	-1	8	0	8	0	Degradation	Amino acid	Glycine, serine and threonine metabolism	L-Serine	795.899	0.0732937	1	0	Enriched	g__Veillonella.s__Veillonella_dispar	g__Veillonella	0.549073	1	g__Veillonella	K01695	0.994262	C00065	C00078	1	1	0	2
g__Veillonella.s__Veillonella_dispar	C00065	-0.012701	0.647218	1	0.354082	0.765275	L-Serine	0	0	Inconsistent	Inconsistent	-1	8	0	8	0	Degradation	Amino acid	Glycine, serine and threonine metabolism	L-Serine	795.899	0.0732937	1	0	Enriched	g__Veillonella.s__Veillonella_dispar	g__Veillonella	0.549073	1	g__Veillonella	K01696	0.985879	C00065	C00078	1	1	0	2
g__Veillonella.s__Veillonella_dispar	C00065	-0.012701	0.647218	1	0.354082	0.765275	L-Serine	0	0	Inconsistent	Inconsistent	-1	8	0	8	0	Degradation	Amino acid	Glycine, serine and threonine metabolism	L-Serine	795.899	0.0732937	1	0	Enriched	g__Veillonella.s__Veillonella_dispar	g__Veillonella	0.549073	1	g__Veillonella	K01752	0.964284	C00065	C02218	1	1	0	2
g__Veillonella.s__Veillonella_dispar	C00065	-0.012701	0.647218	1	0.354082	0.765275	L-Serine	0	0	Inconsistent	Inconsistent	-1	8	0	8	0	Degradation	Amino acid	Glycine, serine and threonine metabolism	L-Serine	795.899	0.0732937	1	0	Enriched	g__Veillonella.s__Veillonella_dispar	g__Veillonella	0.549073	1	g__Veillonella	K01875	0.926886	C00065	C02553	1	1	0	2
g__Veillonella.s__Veillonella_dispar	C00065	-0.012701	0.647218	1	0.354082	0.765275	L-Serine	0	0	Inconsistent	Inconsistent	-1	8	0	8	0	Degradation	Amino acid	Glycine, serine and threonine metabolism	L-Serine	795.899	0.0732937	1	0	Enriched	g__Veillonella.s__Veillonella_dispar	g__Veillonella	0.549073	1	g__Veillonella	K01875	0.926886	C00065	C06481	1	1	0	2
g__Veillonella.s__Veillonella_dispar	C00065	-0.012701	0.647218	1	0.354082	0.765275	L-Serine	0	0	Inconsistent	Inconsistent	-1	8	0	8	0	Degradation	Amino acid	Glycine, serine and threonine metabolism	L-Serine	795.899	0.0732937	1	0	Enriched	g__Veillonella.s__Veillonella_dispar	g__Veillonella	0.549073	1	g__Veillonella	K17103	0.990559	C00065	C02737	1	1	0	2
g__Veillonella.s__Veillonella_dispar	C00085	0.0475202	0.104345	0.268888	0.900605	1	D-Fructose 6-phosphate	0	0	Inconsistent	Inconsistent	-1	1	3	1	0	Degradation	NA	NA	D-Fructose 6-phosphate	-13.4212	0.00985627	0	1	Depleted	g__Veillonella.s__Veillonella_dispar	g__Veillonella	0.526628	1	g__Veillonella	K00820	0.423128	C00085	C00352	1	1	0	1
g__Veillonella.s__Veillonella_parvula	C00064	-0.0294123	0.80611	1	0.19959	0.486274	L-Glutamine	0	0	Inconsistent	Inconsistent	-1	5	0	5	0	Degradation	Amino acid	Glutamate metabolism	L-Glutamine	-120.158	0.0481929	0	1	Depleted	g__Veillonella.s__Veillonella_parvula	g__Veillonella	0.594864	1	g__Veillonella	K00764	0.965518	C00064	C03090	1	1	0	2
g__Veillonella.s__Veillonella_parvula	C00064	-0.0294123	0.80611	1	0.19959	0.486274	L-Glutamine	0	0	Inconsistent	Inconsistent	-1	5	0	5	0	Degradation	Amino acid	Glutamate metabolism	L-Glutamine	-120.158	0.0481929	0	1	Depleted	g__Veillonella.s__Veillonella_parvula	g__Veillonella	0.594864	1	g__Veillonella	K00820	0.978025	C00064	C00352	1	1	0	2
g__Veillonella.s__Veillonella_parvula	C00064	-0.0294123	0.80611	1	0.19959	0.486274	L-Glutamine	0	0	Inconsistent	Inconsistent	-1	5	0	5	0	Degradation	Amino acid	Glutamate metabolism	L-Glutamine	-120.158	0.0481929	0	1	Depleted	g__Veillonella.s__Veillonella_parvula	g__Veillonella	0.594864	1	g__Veillonella	K01886	0.963619	C00064	C02282	1	1	0	2
g__Veillonella.s__Veillonella_parvula	C00064	-0.0294123	0.80611	1	0.19959	0.486274	L-Glutamine	0	0	Inconsistent	Inconsistent	-1	5	0	5	0	Degradation	Amino acid	Glutamate metabolism	L-Glutamine	-120.158	0.0481929	0	1	Depleted	g__Veillonella.s__Veillonella_parvula	g__Veillonella	0.594864	1	g__Veillonella	K01956	0.982515	C00064	C00169	1	1	0	2
g__Veillonella.s__Veillonella_parvula	C00065	-0.012701	0.647218	1	0.354082	0.765275	L-Serine	0	0	Inconsistent	Inconsistent	-1	8	0	8	0	Degradation	Amino acid	Glycine, serine and threonine metabolism	L-Serine	795.899	0.0732937	1	0	Enriched	g__Veillonella.s__Veillonella_parvula	g__Veillonella	0.590174	1	g__Veillonella	K01695	0.994262	C00065	C00078	1	1	0	2
g__Veillonella.s__Veillonella_parvula	C00065	-0.012701	0.647218	1	0.354082	0.765275	L-Serine	0	0	Inconsistent	Inconsistent	-1	8	0	8	0	Degradation	Amino acid	Glycine, serine and threonine metabolism	L-Serine	795.899	0.0732937	1	0	Enriched	g__Veillonella.s__Veillonella_parvula	g__Veillonella	0.590174	1	g__Veillonella	K01696	0.985879	C00065	C00078	1	1	0	2
g__Veillonella.s__Veillonella_parvula	C00065	-0.012701	0.647218	1	0.354082	0.765275	L-Serine	0	0	Inconsistent	Inconsistent	-1	8	0	8	0	Degradation	Amino acid	Glycine, serine and threonine metabolism	L-Serine	795.899	0.0732937	1	0	Enriched	g__Veillonella.s__Veillonella_parvula	g__Veillonella	0.590174	1	g__Veillonella	K01752	0.964284	C00065	C02218	1	1	0	2
g__Veillonella.s__Veillonella_parvula	C00065	-0.012701	0.647218	1	0.354082	0.765275	L-Serine	0	0	Inconsistent	Inconsistent	-1	8	0	8	0	Degradation	Amino acid	Glycine, serine and threonine metabolism	L-Serine	795.899	0.0732937	1	0	Enriched	g__Veillonella.s__Veillonella_parvula	g__Veillonella	0.590174	1	g__Veillonella	K01875	0.926886	C00065	C02553	1	1	0	2
g__Veillonella.s__Veillonella_parvula	C00065	-0.012701	0.647218	1	0.354082	0.765275	L-Serine	0	0	Inconsistent	Inconsistent	-1	8	0	8	0	Degradation	Amino acid	Glycine, serine and threonine metabolism	L-Serine	795.899	0.0732937	1	0	Enriched	g__Veillonella.s__Veillonella_parvula	g__Veillonella	0.590174	1	g__Veillonella	K01875	0.926886	C00065	C06481	1	1	0	2
g__Veillonella.s__Veillonella_parvula	C00065	-0.012701	0.647218	1	0.354082	0.765275	L-Serine	0	0	Inconsistent	Inconsistent	-1	8	0	8	0	Degradation	Amino acid	Glycine, serine and threonine metabolism	L-Serine	795.899	0.0732937	1	0	Enriched	g__Veillonella.s__Veillonella_parvula	g__Veillonella	0.590174	1	g__Veillonella	K17103	0.990559	C00065	C02737	1	1	0	2
g__Veillonella.s__Veillonella_parvula	C00085	0.0475202	0.104345	0.268888	0.900605	1	D-Fructose 6-phosphate	0	0	Inconsistent	Inconsistent	-1	1	3	1	0	Degradation	NA	NA	D-Fructose 6-phosphate	-13.4212	0.00985627	0	1	Depleted	g__Veillonella.s__Veillonella_parvula	g__Veillonella	0.507684	1	g__Veillonella	K00820	0.423128	C00085	C00352	1	1	0	1
unclassified	C00431	0.0489756	0.127644	0.310986	0.873356	1	5-Aminopentanoate	0	0	Inconsistent	Inconsistent	1	0	2	0	2	Synthesis	Amino acid	Urea cycle; arginine-, proline-, metabolism	5-Aminopentanoate	-7750.15	0.000225062	0	1	Depleted	unclassified	unclassified	0.57896	1	unclassified	K10793	0.866093	C00763	C00431	1	1	0	2
unclassified	C00431	0.0489756	0.127644	0.310986	0.873356	1	5-Aminopentanoate	0	0	Inconsistent	Inconsistent	1	0	2	0	2	Synthesis	Amino acid	Urea cycle; arginine-, proline-, metabolism	5-Aminopentanoate	-7750.15	0.000225062	0	1	Depleted	unclassified	unclassified	0.57896	1	unclassified	K10794	0.642052	C00763	C00431	1	1	0	2
unclassified	C00630	-0.0408164	0.899555	1	0.102995	0.293645	2-Methylpropanoyl-CoA	0	0	Inconsistent	Inconsistent	1	0	3	0	3	Synthesis	NA	NA	2-Methylpropanoyl-CoA	14.8601	0.000240519	1	0	Enriched	unclassified	unclassified	0.652273	1	unclassified	K00188	0.95502	C00141	C00630	1	1	0	2
	Contrasting	enrichment of bacteria were contrasting with the enrichment of metabolite in gastrectomy
	Consistent	enrichment of bacteria were consistent with the enrichment of metabolite in gastrectomy
